# Supplementary material for: In Silico Search for Drug Candidates Targeting the PAX8–PPARγ Fusion Protein in Thyroid Cancer
Source: Preprints.org preprint supplement (doi:10.20944/preprints202404.0199.v1), 2024-04-03
Supplement: Supplementary file 1 [file supplementary]

## Sheet: Table S1
UAP
OC1C(O)C(O)COC1O
OC1C(O)C(O)OC(C)C1O
OC1C(O)C(O)OC(C)C1O
O=C([O-])C(=CC(=O)[O-])CC(=O)[O-]
O=[N+]([O-])c1cc(CC(=O)[O-])ccc1
Clc1ccc(C2(O)CCN(CCCC3(c4ccc(F)cc4)SCCS3)CC2)cc1
O=S1(=O)N(Cc2ccccc2)C(COc2ccccc2)C(O)C(O)C(COc2ccccc2)N1[CH-]c1ccccc1
O(CC1N(Cc2ccccc2)C(=O)N(Cc2ccccc2)C(COc2ccccc2)C(O)C1O)c1ccccc1
[NH2+]=C1N=C(N)c2c3c(n(C(CC)CC)cc3)ccc2N1
O=C(NC(C(=O)NC(C(O)CC(=O)OCC)CCCC[NH3+])C(C)C)C(NC(=O)CC(C)C)C(C)C
O=C(NC(C(=O)NC(C(O)CC(=O)OCC)CC(C)C)C(C)C)C(NC(=O)CC(C)C)C(C)C
Brc1ccc([CH-]SCC(NC(=O)CCC([NH3+])C(=O)[O-])C(=O)NCC(=O)[O-])cc1
SCC(NC(=O)CCC([NH3+])C(=O)[O-])C(=O)NCC(=O)[O-]
S(CC(NC(=O)CCC([NH3+])C(=O)[O-])C(=O)NCC(=O)[O-])C1C([N+](=O)[O-])=CC([N+](=O)[O-])=CC1[N+](=O)[O-]
SCC(C(=O)NC(C(=O)[O-])Cc1ccc(OC)cc1)CC(C)C
O=C([O-])c1cc(NC(CC)CC)c(N2C(=O)CCC2(CO)CO)cc1
O=C([O-])C(NC(=O)C(NC(=O)C([NH3+])CCCC[NH3+])Cc1ccc(O)cc1)CCCC[NH3+]
FC(F)(F)C(=O)NC(C(=O)N[N+](CC(=O)Nc1ccc(C(C)C)cc1)(Cc1ccccc1)C)CC(C)C
SCC([NH3+])C(=O)NC(C(=O)NC(C(=O)N)CS)CO
O=C(Nc1scc[nH+]1)c1cc(CN2C(=O)N(Cc3cc(C(=O)Nc4scc[nH+]4)ccc3)C(Cc3ccccc3)C(O)C(O)C2Cc2ccccc2)ccc1
O(C1C(O)C(O)C(OC2C(O)C(O)C(O)OC2CO)OC1CO)C1C(O)C(O)C(OC2C(O)C(O)C(O)C(CO)O2)C(CO)O1
O=C1NCc2c3c4n(C5(C)C(OC)C([NH2+]C)CC(O5)n5c4c(c4c5cccc4)c12)c1c3cccc1
O=C1N(C)C(=O)C2C3(C)C(C)(C)C(C)(C(C)=C3C)C12
S(=O)(=O)(O)c1c2c(c(S(=O)(=O)[O-])c(NC(=O)C)cc2)ccc1
O=C([O-])C(=O)Nc1c(C(=O)[O-])cc2c([nH]cc2)c1
O=C([O-])C=C(C=CC=C(C=CC=1C(C)(C)CCCC=1C)C)C
O=C([O-])C(CC(=O)[O-])Cc1ccccc1
O(C1C(O)C(O)C(O)OC1CO)C1C(O)C(O)C(O)C(CO)O1
[NH+](c1cc(C)ccc1)=C1NC=Nc2n(C)cnc12
O=C(OC1CC2C(C)(C3C(C4C(C)(C(C(CCCC(C)C)C)CC4)CC3)C[CH-]2)CC1)CCCCCCCC=CCC=CCCCCC
O=C([O-])C(=O)CC1(C(=O)[O-])C=CC(O)C=C1
O=C1C2(C)C(C3C(C4(C)C(=CC3)CC(O)CC4)CC2)CC1
S(#N)([N-2])(CC(C(=O)[O-])CC1[CH-][CH-][CH-][CH-][CH-]1)C
O=C([O-])CCCC=CCC=CCC=CCC=CCCCCC
S(=O)(=O)(OC1C(O)C(NC(=O)C)C(OC2C(CO)[NH2+]C(C(=O)NCC=S(=O)([O-])[O-])C2)OC1CO)[O-]
FC(F)(F)c1ccc(NC(=O)C(C#N)C(O)C)cc1
O=C(OCc1ccccc1)NC(C(=O)[O-])C
O=C(NCc1cc2OCOc2cc1)CC1[N+](=C2NC(=[N+]3C=NC=C3)N=C[CH-]2)CCN(C(=O)OC)C1
O(C)c1c(OC)cc(Cc2c(N)nc(N)nc2)cc1OC
O=C([O-])C(NC(=O)c1ccc(NCC2N=C3C(=O)NC(=[NH2+])NC3N[CH-]2)cc1)CCC(=O)[O-]
FC(F)(C(O)(O)C(NC(=O)C(NC(=O)N(Cc1ncccc1)C)C(C)C)Cc1ccccc1)C(NC(=O)C(NC(=O)N(Cc1ncccc1)C)C(C)C)Cc1ccccc1
OCC1C(O)C(O)C(O)C[NH2+]1
O=C1[NH+]=C(N)NC2=NC=C(C(O)C(O)C)NC12
O=C(OCc1ccccc1)NC(C(=O)[O-])C(O)C
P(=O)(O)([O-])CC(=O)N[O-]
O=C(OC(C)(C)C)NC(C(O)CCC(=O)NC(C(O)CC(=O)NC(C(=O)N)CC(C)C)CC1CCCCC1)Cc1ccccc1
O=C(NCc1ccc(NC(=[NH2+])N)cc1)NC12CC3CC(C1)CC(C2)C3
O=C([O-])C=C(C=CC=C(C=CC=1C(C)(C)CCCC=1C)C)C
FC(F)(C(=O)NC)C(O)(O)C(NC(=O)C(NC(=O)C(NC(=O)N1CCOCC1)Cc1ccccc1)CCCC)CC1CCCCC1
S(=O)(=O)(NCC(=O)NC(C(=O)N1CCCCC1)Cc1ccc(C(=[NH2+])N)cc1)c1cc2c(cc1)cccc2
S(=O)(=O)(NC1C(=O)N(Cc2cc3C(=[NH2+])NC=Cc3cc2)CC1)C1=[S+]C=2C(N[CH-][CH-]C=2)[CH-]1
S(=O)(=O)(NC1C(=O)N(CC=2NC3C=NC=CC3C=2)CC1)c1[s+]c2-c([nH]ccc2)c1
[NH+](CC=1C=CC(N)[CH-]C=1)=C1NCCCC1
C(C=C[CH-]C(C)[CH-][CH-]C=1C(C)(C)CCCC=1C)(=CC)C
O=C(C(CC)(C)C)C(=O)N1C(C(=O)OC(CCc2ccccc2)c2ccccc2)CCCC1
O=C1C(=O)N2C(C(=O)OCCCCCCCCCCCC(=O)OCC1(C)C)CCCC2
O=C([O-])CCCC(=O)Nc1ccc(C=Cc2ccccc2)cc1
S(=O)([O-])([O-])=CC(NC(=O)CCC([NH3+])C(=O)[O-])C(=O)NCC(=O)[O-]
O=C(OC1C(C)(C)C2C(C)(C3C(=O)C=C4C(C)(C3(C)CC2)CCC2(C)C4CC(C(=O)[O-])(C)CC2)CC1)CCC(=O)[O-]
O=C(NC)C(NC(=O)C(CC(=O)N[O-])CC(C)C)Cc1ccccc1
P(=O)(O)(C(NC(=O)C(NC(=O)OCc1ccccc1)C(C)C)Cc1ccccc1)C(NC(=O)C(NC(=O)OCc1ccccc1)C(C)C)Cc1ccccc1
S(=O)(=O)(N(CC(O)C(NC(=O)OC1COCC1)CC1=CC=C[CH-][CH-]1)CC(C)C)c1ccc(N)cc1
S(CC(NC(=O)COc1c2c(cncc2)ccc1)C(=O)NC(C(O)C(=O)N1C(C(=O)NC(C)(C)C)CSC1)Cc1ccccc1)C
O=C(NC(C=O)C)C(NC(=O)C([NH3+])C)C(C)C
O=C([O-])C([NH3+])Cc1nc[nH]c1
O=C(NCc1ccccc1)C(NC(=O)Cc1ccccc1)C1SC(C)(C)C(C(=O)[O-])N1
O=C(NCc1ccccc1)C(NC(=O)Cc1ccccc1)C1SC(C)(C)C(C(=O)NC(CO)Cc2ccccc2)N1
O=C(NCc1ccccc1)C(NC(=O)Cc1ccccc1)C1SC(C)(C)C(C(=O)NC(CO)Cc2ccccc2)N1
O=C(NCc1ccccc1)C(NC(=O)Cc1ccccc1)C1SC(C)(C)C(C(=O)NC(CO)Cc2ccccc2)N1
O=C(NCc1ccccc1)C(NC(=O)Cc1ccccc1)C1SC(C)(C)C(C(=O)NC(C(O)CC(=O)NCC=2[NH+]=C3C([NH+]=2)C=CC=C3)Cc2ccccc2)N1
O=C(N(Cc1ncccc1)C)NC(C(=O)NC(C(O)C(O)C(NC(=O)C(NC(=O)N(Cc1ncccc1)C)C(C)C)Cc1ccccc1)Cc1ccccc1)C(C)C
O=C1N(Cc2cc3c(cc2)cccc3)C(Cc2ccccc2)C(O)C(O)C(Cc2ccccc2)N1Cc1cc2c(cc1)cccc2
O=C(NC(C(O)CN1C(C(=O)NC(C)(C)C)CC2C(C1)CCCC2)Cc1ccccc1)C(NC(=O)C1NC2C([CH-][CH-]1)[CH-][CH-][CH-][CH-]2)CC(=O)N
O=C(OCc1sc[nH+]c1)NC(C(O)CC(NC(=O)C(NC(=O)[N+](=C)Cc1[nH+]c(C(C)C)sc1)C(C)C)Cc1ccccc1)Cc1ccccc1
O=C([O-])C(CC(=O)[O-])Cc1ccccc1
S(Cc1cnccc1)C1CC(C(=O)NC(C)(C)C)[NH+](CC(O)C(NC(=O)C(NC(=O)c2nc3c(cc2)cccc3)C(C)C)Cc2ccccc2)CC1
O=[N+]([O-])C1C(NC(=O)C)C(O)=CC(C(=O)[O-])=C1
O=C(NCC1N[CH-][CH-][CH-][CH-]1)C(NC(=O)C(C(O)C(=O)C(NC(=O)C(NC(=O)COc1c2c(ccc1)cccc2)Cc1[nH+][cH-][nH+]c1)=CC1CCCCC1)C(C)C)C(CC)C
O=C(NCC(=O)N[O-])C(NC(=O)C1[NH2+]CCC1)CC(C)C
O=C(NC(C(O)CNC(=O)C(C(C)(C)C)CC(O)=[NH+]C(CC)CC)Cc1ccccc1)C(NC(=O)C1NC2C([CH-][CH-]1)[CH-][CH-][CH-][CH-]2)C(O)C
O=C([O-])C([NH3+])CCC[NH3+]
O=C(OCc1ccccc1)NC(C(=O)[O-])C
P(=O)(O)([O-])C([NH3+])CC(C)C
O=C([O-])C(=O)N
S(=O)([O-])([O-])=CCCCCCCCCCCCCCCC
O=C([O-])C(NC(=O)C([NH3+])C(C)C)CCCC[NH3+]
O=C([O-])C([NH3+])CCCC[NH3+]
O=C(OCc1ccccc1)NC(C(=O)[O-])C(O)C
[nH]1cncc1
O=C([O-])C(O)(C)c1ccccc1
O=C1N(Cc2ccc(CO)cc2)C(Cc2ccccc2)C(O)C(O)C(Cc2ccccc2)N1Cc1ccc(CO)cc1
O=C(OCC)C=1C(=O)Oc2c(ccc(O)c2)C=1
O=C([O-])C(O)(CC(=O)[O-])CC(=O)[O-]
O=C(NC1C(=O)NCCCCCCn2c3c(c(c2)C1)cccc3)C(CC(=O)N[O-])CC(C)C
NC=1N=CNC2NC=[NH+]C=12
O=C([O-])C(Cc1cc2c(ccc(C(=[NH2+])N)c2)cc1)c1ccc(OC2CCN(C(N)C)CC2)cc1
C(CC)(C)C=1SCCN=1
O=C(OC1C(OC2C([NH2+]C)C(O)C(O)C(C)O2)C=2C(=C1)CCC1(C3OC(=O)OC3)OC1C#CC=2)c1c(O)ccc2c(C)cc(OC)cc12
O=[N+]([O-])c1c([O-])ccc(CC(=O)[O-])c1
O=[N+]([O-])CC(O)(C(=O)[O-])CC(=O)[O-]
O=C(OC(C)(C)C)NC(C(O)C[NH2+]CC(O)C(NC(=O)OC(C)(C)C)Cc1ccccc1)Cc1ccccc1
S(=O)([O-])(=N)c1c2c(c(N(C)C)ccc2)ccc1
O=C([O-])c1ccc(N)cc1
P(=O)(OCC(=O)O)(O)[O-]
S(CC(NC(=O)CCC([NH3+])C(=O)[O-])C(=O)NCC(=O)[O-])CCCCCC
C1(C2C=C[CH-][CH-][CH-]2)NC=N[CH-]1
O=C(C(C)(C)C1=CN[CH-][CH-][CH-]1)C1=CN[CH-][CH-][CH-]1
P([OH2+])(=O)(OCC(OP([OH2+])(=O)CCCCCCC)COCCCCCCCC)OCC[NH3+]
S(=O)(=O)(NCC(=O)NC(C(=O)N1CCCCC1)Cc1ccc(C(=[NH2+])N)cc1)c1cc2c(cc1)cccc2
S(=O)(=O)(NC(C(=O)N1CCCCC1)Cc1cc(C(=[NH2+])N)ccc1)c1ccc(C)cc1
O(C)c1c(O)ccc(CN2N(Cc3ccccc3)CC(O)C(Cc3ccccc3)N(Cc3cc(OC)c(O)cc3)C2=O)c1
O=C(NC(C(=O)NC(C(O)CC(=O)NC(C(=O)NC(C(O)CC(=O)[O-])CC(C)C)C)CC(C)C)C(C)C)C(NC(=O)CC(C)C)C(C)C
O=C(Nc1[s+]cc[nH]1)c1cc(CN2C(=O)N(Cc3cc(C(=O)Nc4[s+]cc[nH]4)ccc3)C(Cc3ccccc3)C(O)C(O)C2Cc2ccccc2)ccc1
O=C(Nc1[s+]cc[nH]1)c1cc(CN2C(=O)N(CC3CC3)C(Cc3ccccc3)C(O)C(O)C2Cc2ccccc2)ccc1
O=C([O-])c1c(C(=O)[O-])cccn1
O=C(NC)C(NC(=O)C(C(O)C(=O)NO)CC(C)C)C(C)(C)C
P([OH2+])(=O)(OCC1C(O)C(O)C(N2C(=O)N=C(N)C=C2)O1)OC1C(F)C(n2c3NC(=[NH2+])NC(=O)c3nc2)OC1CO
S(=O)(=O)(C(C)(C)C)CC(C(=O)NC(C(=O)NC(C(O)CC(C(=O)NCCCC)C(C)C)CC1CCCCC1)Cc1[nH]cnc1)Cc1ccccc1
P(=O)(OC1C(O)C(CO)OC1n1c2N=C(N)NC(=O)c2nc1)(O)[O-]
P(=O)(OC1C(O)C(CO)OC1[N+]=1C(=O)NC(N)=CC=1)(O)[O-]
P(=O)(OCC1C(OP(=O)(O)[O-])CC(N2C(=O)NC(=O)C(C)=C2)O1)(O)[O-]
O=C([O-])c1c(N=Nc2c3c(c(O)cc2)cccc3)cccc1
P([OH2+])(=O)(OC1C(O)C(O)C(O)C(C)O1)NC(C(=O)NC(C(=O)[O-])CC1=C2C([NH+]=C1)=C[CH-][CH-][CH-]2)CC(C)C
O=C([O-])C([NH2+]C(C(=O)NC(C(=O)[O-])Cc1c2c([nH]c1)cccc2)CC(C)C)CCc1ccccc1
[NH3+]CC1CCCCC1
Fc1ccc(C[NH3+])cc1
[NH3+]CCCCc1ccccc1
[NH3+]C1C(c2ccccc2)C1
O=C(Nc1ccc(O)cc1)C
O=C1C(O)C(=O)OC1C(O)CO
OCC1C(O)C(O)C(O)CO1
P([OH2+])(OCc1ccc([N+](=O)[O-])cc1)([O-])=CCCC(=O)[NH+]=CC(=O)[O-]
P(=O)(OC1C(O)C(CO)OC1n1c2N=C(N)NC(=O)c2nc1)(O)[O-]
Oc1cc([N+](CC)(C)C)ccc1
OCC1C(O)C(O)C(n2c3N=CNC(O)c3nc2)O1
O=C([O-])C12C=CC(O)C(OC(C(=O)[O-])C1)C2
O=C([O-])C(O)(CC(=O)[O-])CC(=O)[O-]
O=C1C2(C)C(C)(C)C(C1)CC2
O=C([O-])C(O)Cc1ccccc1
P(=O)(OCC(O)C(O)C(O)CN1c2c([NH+]=C3C(O)NC(=O)N=C13)cc(C)c(C)c2)(O)[O-]
OCC1C(O)C(O)C(O)C(O)O1
Clc1c(Cl)c(C(=O)C(=C)CC)ccc1OCC(=O)[O-]
O=C([O-])CCCCCCCCCCCCCCC
S(CC(NC(=O)CCC([NH3+])C(=O)[O-])C(=O)NCC(=O)[O-])C1C(O)c2c(-c3c1cccc3)cccc2
O=C([O-])CCCCC[NH3+]
O=C(NC1C(OC(CC)CC)C=C(C(=O)[O-])CC1[NH3+])C
P(=O)(O)([O-])NC(C(=O)N)CC(C)C
O=C(OC(C)(C)C)NCCC(=O)Nc1cc(C(C=2C(=O)OC(C(CC)Cc3ccccc3)=CC=2O)C2CC2)ccc1
O=[N+]([O-])C=1C=CC(C(O)C(NC(=O)C(C)C)CO)[CH-]C=1
O=C([O-])C(NC(=O)C[NH3+])Cc1ccc(O)cc1
Oc1ccc(C(=C(CC)c2ccc(O)cc2)CC)cc1
O(CC[NH+](C)C)c1ccc(C(=C(CC)c2ccccc2)c2ccc(O)cc2)cc1
S(CC(NC(=O)CCC([NH3+])C(=O)[O-])C(=O)NCC(=O)[O-])C1C(O)C(=O)C(=O)c2c1c1c3c4c(cc1)cccc4ccc3c2
O=C([O-])C(NC(=O)C([NH3+])C(CC)C)C(C)C
O=C([O-])C1=[NH+]C2=C3C(C(=O)[O-])[CH-]C(C(=O)[O-])N=C3C(=O)C(=O)C2=C1
FC(F)(C(=O)NCCc1ccccc1)C([O-])([O-])C(NC(=O)C1N(C(=O)C(NC(=O)C)C)CCC1)C(C)C
Fc1c(NC(=O)C(O)c2cc3C(C)(C)CCC(C)(C)c3cc2)ccc(C(=O)[O-])c1
O=C(NC1C(O)Cc2c1cccc2)C(CC(O)CC(C(=O)NC1C(O)Cc2c1cccc2)Cc1ccccc1)Cc1ccccc1
OCC1C(O)C(O)C(O)C(O)O1
OCC1C(O)C(O)C(O)C(O)O1
O=C1C2CC3CC1CC(C2)C3
O=C(OC)C(NC(=O)C(NC(=O)C(NCC(O)C([NH3+])CC(C)C)C(C)C)C(CC)C)Cc1ccccc1
P([OH2+])(=O)(OC1C(O)C(CO)OC1N1C=NC2=C(N)NC=NC12)O
P(=O)(OCC(=O)NO)(O)[O-]
S(CC(NC(=O)CCC([NH3+])C(=O)[O-])C(=O)NC(C(=O)[O-])c1ccccc1)Cc1ccccc1
Clc1c(Cl)c(C(=O)C(CSCC(NC(=O)CCC([NH3+])C(=O)[O-])C(=O)NCC(=O)[O-])CC)ccc1OCC(=O)[O-]
S(CC(NC(=O)CCC([NH3+])C(=O)[O-])C(=O)NCC(=O)[O-])CCCCCCCCC
S(CC(NC(=O)CCC([NH3+])C(=O)[O-])C(=O)NCC(=O)[O-])c1c([N+](=O)[O-])cc(N([O-])[O-])cc1
S(=O)(=O)([O-])C1C(N)=C2C(=O)c3c(C(=O)C2C(N)=C1)cccc3
ClCCN(CCCl)c1ccc(CCCC(=O)[O-])cc1
O=C(NC1C(C(O)C(O)CO)OC(C(=O)[O-])=CC1NC(=[NH2+])N)C
O=C(NC1C(C(=O)N(CCC)CCc2ccccc2)OC(C(=O)[O-])=CC1[NH3+])C
O=C(C)C1C2(C)C(C3C(C4(C)C(=CC(=O)CC4)CC3)CC2)CC1
S(=O)([O-])(=N)C=1[S+]=C2S(=O)(=O)N(CCOCC)CC([NH2+]CC)C2C=1
OC1C(O)C(O)COC1O

## Sheet: Table S2
Generic Name	SMILES
Troglitazone	O(CC1(C)Oc2c(C)c(C)c(O)c(C)c2CC1)c1ccc(CC2C(=O)NC(=O)S2)cc1
Flucloxacillin	Clc1c(-c2c(C(=O)N[C@@H]3C(=O)N4[C@@H](C(=O)O)C(C)(C)S[C@H]34)c(C)on2)c(F)ccc1
Piperacillin	O=C(N[C@@H]1C(=O)N2[C@@H](C(=O)O)C(C)(C)S[C@H]12)[C@H](NC(=O)N1C(=O)C(=O)N(CC)CC1)c1ccccc1
Rosiglitazone	O(CCN(C)c1ncccc1)c1ccc(CC2C(=O)NC(=O)S2)cc1
Ampicillin	O=C(N[C@@H]1C(=O)N2[C@@H](C(=O)O)C(C)(C)S[C@H]12)[C@H](N)c1ccccc1
Phenoxymethylpenicillin	O=C(N[C@@H]1C(=O)N2[C@@H](C(=O)O)C(C)(C)S[C@H]12)COc1ccccc1
Dicloxacillin	Clc1c(-c2c(C(=O)N[C@@H]3C(=O)N4[C@@H](C(=O)O)C(C)(C)S[C@H]34)c(C)on2)c(Cl)ccc1
Carbenicillin	O=C(O)C(C(=O)N[C@@H]1C(=O)N2[C@@H](C(=O)O)C(C)(C)S[C@H]12)c1ccccc1
Nafcillin	O=C(O)[C@H]1C(C)(C)S[C@@H]2[C@H](NC(=O)c3c(OCC)ccc4c3cccc4)C(=O)N12
Oxacillin	O=C(O)[C@H]1C(C)(C)S[C@@H]2[C@H](NC(=O)c3c(C)onc3-c3ccccc3)C(=O)N12
Hetacillin	O=C(O)[C@H]1C(C)(C)S[C@@H]2[C@H](N3C(=O)[C@@H](c4ccccc4)NC3(C)C)C(=O)N12
Levamisole	[C@@H]1(c2ccccc2)N=C2SCCN2C1
Mezlocillin	S(=O)(=O)(C)N1C(=O)N(C(=O)N[C@@H](C(=O)N[C@@H]2C(=O)N3[C@@H](C(=O)O)C(C)(C)S[C@H]23)c2ccccc2)CC1
Cyclacillin	O=C(O)[C@H]1C(C)(C)S[C@@H]2[C@H](NC(=O)C3(N)CCCCC3)C(=O)N12
Benzylpenicillin	O=C(N[C@@H]1C(=O)N2[C@@H](C(=O)O)C(C)(C)S[C@H]12)Cc1ccccc1
Amoxicillin	O=C(N[C@@H]1C(=O)N2[C@@H](C(=O)O)C(C)(C)S[C@H]12)[C@H](N)c1ccc(O)cc1
Azlocillin	O=C(N[C@@H]1C(=O)N2[C@@H](C(=O)O)C(C)(C)S[C@H]12)[C@H](NC(=O)N1C(=O)NCC1)c1ccccc1
Pioglitazone	O(CCc1ncc(CC)cc1)c1ccc(CC2C(=O)NC(=O)S2)cc1
Cloxacillin	Clc1c(-c2c(C(=O)N[C@@H]3C(=O)N4[C@@H](C(=O)O)C(C)(C)S[C@H]34)c(C)on2)cccc1
Amdinocillin	O=C(O)[C@H]1C(C)(C)S[C@@H]2[C@H](N=CN3CCCCCC3)C(=O)N12
Bacampicillin	O=C(OC(OC(=O)[C@H]1C(C)(C)S[C@@H]2[C@H](NC(=O)[C@H](N)c3ccccc3)C(=O)N12)C)OCC
Meticillin	O=C(O)[C@H]1C(C)(C)S[C@@H]2[C@H](NC(=O)c3c(OC)cccc3OC)C(=O)N12
Pivampicillin	O=C(N[C@@H]1C(=O)N2[C@@H](C(=O)OCOC(=O)C(C)(C)C)C(C)(C)S[C@H]12)[C@H](N)c1ccccc1
Pivmecillinam	O=C(OCOC(=O)[C@H]1C(C)(C)S[C@@H]2[C@H](N=CN3CCCCCC3)C(=O)N12)C(C)(C)C
Tazobactam	O=C(O)[C@H]1[C@@](Cn2nncc2)(C)S(=O)(=O)[C@H]2N1C(=O)C2
Ticarcillin	O=C(O)[C@@H](C(=O)N[C@@H]1C(=O)N2[C@@H](C(=O)O)C(C)(C)S[C@H]12)c1cscc1
2,2-Dimethylthiazolidine-4-Carboxylic Acid;(Dmt)Thiazolidine	O=C(O)[C@H]1NC(C)(C)SC1
Latrunculin A	O=C1SC[C@@H]([C@]2(O)O[C@H]3C[C@@H](OC(=O)/C=C(/C)\CC/C=C/C=C\[C@@H](C)CC3)C2)N1
JE-2147	O=C([C@@H](O)[C@@H](NC(=O)c1c(C)c(O)ccc1)Cc1ccccc1)N1[C@H](C(=O)NCc2c(C)cccc2)C(C)(C)SC1
L-thioproline	O=C(O)[C@H]1NCSC1
Tricyclazole	Cc1c2-n3c(Sc2ccc1)nnc3
(2R,4S)-2-[(1R)-1-{[(2Z)-2-(2-Amino-1,3-thiazol-4-yl)-2-(methoxyimino)acetyl]amino}-2-oxoethyl]-5,5-dimethyl-1,3-thiazolidine-4-carboxylic acid	O=C(N[C@H](C=O)[C@H]1SC(C)(C)[C@H](C(=O)O)N1)/C(=N\OC)/c1nc(N)sc1
Isopenicillin N	O=C(O)[C@@H](N)CCCC(=O)N[C@@H]1C(=O)N2[C@@H](C(=O)O)C(C)(C)S[C@H]12
(2R,4S)-2-[(1R)-1-{[(2R)-2-Amino-2-(4-hydroxyphenyl)acetyl]amino}-2-oxoethyl]-5,5-dimethyl-1,3-thiazolidine-4-carboxylic acid	O=C(N[C@H](C=O)[C@H]1SC(C)(C)[C@H](C(=O)O)N1)[C@H](N)c1ccc(O)cc1
(2S,5R,6R)-6-({(6S)-6-[(Ammonioacetyl)amino]-6-carboxylatohexanoyl}amino)-3,3-dimethyl-7-oxo-4-thia-1-azabicyclo[3.2.0]heptane-2-carboxylate	O=C([O-])[C@@H](NC(=O)C[NH3+])CCCCC(=O)N[C@@H]1C(=O)N2[C@@H](C(=O)[O-])C(C)(C)S[C@H]12
5-QUINOXALIN-6-YLMETHYLENE-THIAZOLIDINE-2,4-DIONE	O=C1/C(=C/c2cc3nccnc3cc2)/SC(=O)N1
NGX267	O=C1[C@H](CC)SC2(N1)CCN(C)CC2
Edaglitazone	O(CCc1c(C)oc(-c2ccccc2)n1)c1c2c(c(CC3C(=O)NC(=O)S3)cc1)scc2
[(5R)-5-(2,3-dibromo-5-ethoxy-4-hydroxybenzyl)-4-oxo-2-thioxo-1,3-thiazolidin-3-yl]acetic acid	Brc1c(Br)c(C[C@@H]2C(=O)N(CC(=O)O)C(=S)S2)cc(OCC)c1O
5R-(3,4-DICHLOROPHENYLMETHYL)-3-(2-THIOPHENESULFONYLAMINO)-4-OXO-2-THIONOTHIAZOLIDINE	Clc1c(Cl)ccc(C[C@@H]2C(=O)N(NS(=O)(=O)c3sccc3)C(=S)S2)c1
(R)-(+)9B-(3-METHYL)PHENYL-2,3-DIHYDROTHIAZOLO[2,3-A]ISOINDOL-5(9BH)-ONE	O=C1N2[C@](c3cc(C)ccc3)(SCC2)c2c1cccc2
(R)-(+) 5(9BH)-OXO-9B-PHENYL-2,3-DIHYDROTHIAZOLO[2,3-A]ISOINDOL-3-CARBOXYLIC ACID METHYL ESTER	O=C(OC)[C@H]1N2C(=O)c3c([C@@]2(c2ccccc2)SC1)cccc3
(5E)-5-[(2,2-DIFLUORO-1,3-BENZODIOXOL-5-YL)METHYLENE]-1,3-THIAZOLIDINE-2,4-DIONE	FC1(F)Oc2c(O1)ccc(/C=C\1/C(=O)NC(=O)S/1)c2
(5E)-2-Amino-5-(2-pyridinylmethylene)-1,3-thiazol-4(5H)-one	O=C1/C(=C\c2ncccc2)/SC(=N)N1
4-{5-[(Z)-(2,4-DIOXO-1,3-THIAZOLIDIN-5-YLIDENE)METHYL]FURAN-2-YL}BENZENESULFONAMIDE	S(=O)(=O)(N)c1ccc(-c2oc(/C=C\3/C(=O)NC(=O)S/3)cc2)cc1
4-{5-[(Z)-(2-IMINO-4-OXO-1,3-THIAZOLIDIN-5-YLIDENE)METHYL]-2-FURYL}-N-METHYLBENZENESULFONAMIDE	S(=O)(=O)(NC)c1ccc(-c2oc(/C=C\3/C(=O)NC(=N)S/3)cc2)cc1
4-{5-[(Z)-(2-IMINO-4-OXO-1,3-THIAZOLIDIN-5-YLIDENE)METHYL]FURAN-2-YL}BENZENESULFONAMIDE	S(=O)(=O)(N)c1ccc(-c2oc(/C=C\3/C(=O)NC(=N)S/3)cc2)cc1
4-{5-[(Z)-(2-IMINO-4-OXO-1,3-THIAZOLIDIN-5-YLIDENE)METHYL]FURAN-2-YL}-2-(TRIFLUOROMETHYL)BENZENESULFONAMIDE	S(=O)(=O)(N)c1c(C(F)(F)F)cc(-c2oc(/C=C\3/C(=O)NC(=N)S/3)cc2)cc1
4-{5-[(Z)-(2-IMINO-4-OXO-1,3-THIAZOLIDIN-5-YLIDENE)METHYL]FURAN-2-YL}BENZOIC ACID	O=C(O)c1ccc(-c2oc(/C=C\3/C(=O)NC(=N)S/3)cc2)cc1
4-{5-[(1Z)-1-(2-IMINO-4-OXO-1,3-THIAZOLIDIN-5-YLIDENE)ETHYL]-2-FURYL}BENZENESULFONAMIDE	S(=O)(=O)(N)c1ccc(-c2oc(/C(/C)=C\3/C(=O)NC(=N)S/3)cc2)cc1
(2R,4S)-2-[(R)-BENZYLCARBAMOYL-PHENYLACETYL-METHYL]-5,5-DIMETHYL-THIAZOLIDINE-4-CARBOXYLIC ACID	O=C(NCc1ccccc1)[C@@H](NC(=O)Cc1ccccc1)[C@H]1SC(C)(C)[C@H](C(=O)O)N1
(Z)-3-BENZYL-5-(2-HYDROXY-3-NITROBENZYLIDENE)-2-THIOXOTHIAZOLIDIN-4-ONE	S=C1N(Cc2ccccc2)C(=O)/C(=C/c2c(O)c([N+](=O)[O-])ccc2)/S1
Latrunculin B	O=C1SC[C@@H]([C@]2(O)O[C@H]3C[C@@H](OC(=O)/C=C(/C)\CC/C=C\[C@@H](C)CC3)C2)N1
(E)-3-(5((5-(4-CHLOROPHENYL)FURAN-2-YL)METHYLENE)-4-OXO-2-THIOXOTHIAZOLIDIN-3-YL)PROPANOIC ACID	Clc1ccc(-c2oc(/C=C/3\C(=O)N(CCC(=O)O)C(=S)S\3)cc2)cc1
(2S)-2-(3-bromophenyl)-3-(5-chloro-2-hydroxyphenyl)-1,3-thiazolidin-4-one	Brc1cc([C@H]2N(c3c(O)ccc(Cl)c3)C(=O)CS2)ccc1
N-[(2S,4S,6R)-2-(dihydroxymethyl)-4-hydroxy-3,3-dimethyl-7-oxo-4lambda~4~-thia-1-azabicyclo[3.2.0]hept-6-yl]-2-phenylacetamide	O=C(N[C@@H]1C(=O)[N@@]2[C@@H](C(=O)O)C(C)(C)[S@+](O)[C@H]12)Cc1ccccc1
(5R)-2-sulfanyl-5-[4-(trifluoromethyl)benzyl]-1,3-thiazol-4(5H)-one	S=C1S[C@H](Cc2ccc(C(F)(F)F)cc2)C(=O)N1
(5R)-5-(4-{[(2R)-6-HYDROXY-2,5,7,8-TETRAMETHYL-3,4-DIHYDRO-2H-CHROMEN-2-YL]METHOXY}BENZYL)-1,3-THIAZOLIDINE-2,4-DIONE	O(C[C@]1(C)Oc2c(C)c(C)c(O)c(C)c2CC1)c1ccc(C[C@@H]2C(=O)NC(=O)S2)cc1
Azidocillin	O=C(N[C@@H]1C(=O)N2[C@@H](C(=O)O)C(C)(C)S[C@H]12)[C@H](N=[N+]=[N-])c1ccccc1
Letosteine	S(CC(=O)OCC)CCC1SCC(C(=O)O)N1
Etozoline	O=C(OCC)/C=C\1/N(C)C(=O)C(N2CCCCC2)S/1
Lobeglitazone	O(CCN(C)c1ncnc(Oc2ccc(OC)cc2)c1)c1ccc(CC2C(=O)NC(=O)S2)cc1
Netoglitazone	Fc1c(COc2cc3c(cc(CC4C(=O)NC(=O)S4)cc3)cc2)cccc1
Rivoglitazone	O(Cc1n(C)c2c(n1)ccc(OC)c2)c1ccc(CC2C(=O)NC(=O)S2)cc1
Ciglitazone	O(CC1(C)CCCCC1)c1ccc(CC2C(=O)NC(=O)S2)cc1
Carindacillin	O=C(Oc1cc2c(cc1)CCC2)C(C(=O)N[C@@H]1C(=O)N2[C@@H](C(=O)O)C(C)(C)S[C@H]12)c1ccccc1
Sulbactam	O=C(O)[C@H]1C(C)(C)S(=O)(=O)[C@H]2N1C(=O)C2
Pidotimod	O=C(O)[C@H]1N(C(=O)[C@H]2NC(=O)CC2)CSC1
Mitoglitazone	O=C(COc1ccc(CC2C(=O)NC(=O)S2)cc1)c1ncc(CC)cc1
Efatutazone	O(Cc1n(C)c2c(n1)ccc(Oc1cc(C)c(N)c(C)c1)c2)c1ccc(CC2C(=O)NC(=O)S2)cc1
2,4-thiazolidinedione	O=C1SCC(=O)N1
Teneligliptin	O=C(N1CSCC1)[C@H]1NC[C@@H](N2CCN(c3n(-c4ccccc4)nc(C)c3)CC2)C1
GSK-1059615	O=C1/C(=C/c2cc3c(-c4ccncc4)ccnc3cc2)/SC(=O)N1
Sultamicillin	O=C(N[C@@H]1C(=O)N2[C@@H](C(=O)OCOC(=O)[C@H]3C(C)(C)S(=O)(=O)[C@H]4N3C(=O)C4)C(C)(C)S[C@H]12)[C@H](N)c1ccccc1
Oxothiazolidinecarboxylic acid	O=C(O)[C@H]1NC(=O)SC1
Temocillin	O=C(O)C(C(=O)N[C@]1(OC)C(=O)N2[C@@H](C(=O)O)C(C)(C)S[C@H]12)c1cscc1
Balaglitazone	O(CC=1N(C)C(=O)c2c(N=1)cccc2)c1ccc(CC2C(=O)NC(=O)S2)cc1
Timonacic	O=C(O)C1NCSC1
Piprozolin	O=C(OCC)/C=C\1/N(CC)C(=O)C(N2CCCCC2)S/1
Epicillin	O=C(N[C@@H]1C(=O)N2[C@@H](C(=O)O)C(C)(C)S[C@H]12)[C@H](N)C1=CCC=CC1
Pheneticillin	O=C(N[C@@H]1C(=O)N2[C@@H](C(=O)O)C(C)(C)S[C@H]12)C(Oc1ccccc1)C
Carfecillin	O=C(Oc1ccccc1)C(C(=O)N[C@@H]1C(=O)N2[C@@H](C(=O)O)C(C)(C)S[C@H]12)c1ccccc1
Propicillin	O=C(N[C@@H]1C(=O)N2[C@@H](C(=O)O)C(C)(C)S[C@H]12)C(Oc1ccccc1)CC
Clometocillin	Clc1c(Cl)ccc(C(OC)C(=O)N[C@@H]2C(=O)N3[C@@H](C(=O)O)C(C)(C)S[C@H]23)c1
Sulbenicillin	S(=O)(=O)(O)[C@@H](C(=O)N[C@@H]1C(=O)N2[C@@H](C(=O)O)C(C)(C)S[C@H]12)c1ccccc1
Penamecillin	O=C(N[C@@H]1C(=O)N2[C@@H](C(=O)OCOC(=O)C)C(C)(C)S[C@H]12)Cc1ccccc1
Talampicillin	O=C(N[C@@H]1C(=O)N2[C@@H](C(=O)OC3OC(=O)c4c3cccc4)C(C)(C)S[C@H]12)[C@H](N)c1ccccc1
Aspoxicillin	O=C(N[C@@H](C(=O)N[C@@H]1C(=O)N2[C@@H](C(=O)O)C(C)(C)S[C@H]12)c1ccc(O)cc1)[C@H](N)CC(=O)NC
Metampicillin	O=C(N[C@@H]1C(=O)N2[C@@H](C(=O)O)C(C)(C)S[C@H]12)[C@H](N=C)c1ccccc1
Darglitazone	O=C(CCc1c(C)oc(-c2ccccc2)n1)c1ccc(CC2C(=O)NC(=O)S2)cc1
Englitazone	O=C1C(Cc2cc3c(O[C@@H](Cc4ccccc4)CC3)cc2)SC(=O)N1
Leriglitazone	O(CCc1ncc(C(O)C)cc1)c1ccc(CC2C(=O)NC(=O)S2)cc1
Epalrestat	S=C1N(CC(=O)O)C(=O)/C(=C/C(=C/c2ccccc2)/C)/S1
Sulbactam pivoxil	O=C(OCOC(=O)[C@H]1C(C)(C)S(=O)(=O)[C@H]2N1C(=O)C2)C(C)(C)C
Azemiglitazone	O=C(COc1ccc(CC2C(=O)NC(=O)S2)cc1)c1cc(OC)ccc1
Ebopiprant	S(=O)(=O)(N1[C@H](C(=O)N[C@@H](CCOC(=O)[C@@H](N)C(C)C)c2ccc(F)cc2)SCC1)c1ccc(-c2ccccc2)cc1
Tetramisole	c1(C2N=C3SCCN3C2)ccccc1

## Sheet: Table S3
	IC50			Kd		Ki
	All 1331	TZD 77	PA 55	All 31	TZD 2	All 366	All 346	TZD 30	PA 31
Clc1ccc(cc1C(=O)Nc1ccccc1)[N+](=O)[O-]	✓
Clc1ccc(cc1C(=O)Nc1ccncc1)[N+](=O)[O-]	✓
O=C(c1cn(nc1c1ccccc1)c1ccccc1)Oc1ccc(cc1)[N+](=O)[O-]	✓
O=C1NC(=O)C(=Cc2ccc(cc2)N(CCOc2ccc(cc2)[N+](=O)[O-])CCOc2ccc(cc2)[N+](=O)[O-])C(=O)N1	✓
OC(=O)[C@@]1(C)CCc2c(O1)cc(cc2)OCCCOc1ccc(cc1Cl)C1CCC2(CC1)CC2	✓
Clc1cc(ccc1OCCCOc1ccc2c(c1)O[C@@](CC2)(C)C(=O)O)C1CCCC1	✓
Clc1cc(ccc1OCCCOc1ccc2c(c1)O[C@@](CC2)(C)C(=O)O)C1CCCCC1	✓
Fc1ccc(cc1)Oc1ccc(c(c1)Cl)OCCCOc1ccc2c(c1)O[C@@](CC2)(C)C(=O)O	✓
OC(=O)[C@@]1(C)CCc2c(O1)cc(cc2)OCCCOc1ccc(cc1Cl)Oc1ccccc1	✓
Clc1cc(ccc1OCCCOc1ccc2c(c1)O[C@@](CC2)(C)C(=O)O)OCC(F)(F)F	✓
OC(=O)[C@@]1(C)CCc2c(O1)cc(cc2)OCCCOc1ccc(cc1Cl)OCC1CCC1	✓
O=C1NC(=O)[C@@](O1)(C)c1cccc(c1)Cn1c(=O)n(c2c1cccc2)c1noc2c1ccc(c2)Cl	✓
O=C(c1ccc2c(c1)c(C)c(n2Cc1ccc(cc1)c1ccccc1C(=O)O)C)NC[C@@H](c1ccccc1)C	✓
Brc1ccc(cc1)[C@H](NC(=O)c1ccc2c(c1)c(C)c(n2Cc1ccc(cc1)c1ccccc1C(=O)O)C)C	✓
O=C(c1ccc2c(c1)c(C)c(n2Cc1ccc(cc1)c1ccccc1C(=O)O)C)N[C@@H](c1ccc(cc1)[N+](=O)[O-])C	✓
Fc1ccc(cc1)[C@H](NC(=O)c1ccc2c(c1)c(C)c(n2Cc1ccc(cc1)c1ccccc1C(=O)O)C)C	✓
OC(=O)[C@H](Oc1cc(ccc1Cl)Cn1c(=O)n(c2c1cc(cc2)C(F)(F)F)C(=O)c1ccc(cc1)Cl)C	✓
OC(=O)[C@H](Oc1cc(ccc1Cl)Cn1c(=O)n(c2c1cc(cc2)C(F)(F)F)c1noc2c1cccc2C)C	✓
OC(=O)[C@H](Oc1cc(ccc1Cl)Cn1c(=O)n(c2c1cc(cc2)C(F)(F)F)c1noc2c1ccc(c2)C)C	✓
OC(=O)[C@H](Oc1cc(ccc1Cl)Cn1c(=O)n(c2c1cc(cc2)C(F)(F)F)c1noc2c1ccc(c2)Cl)C	✓
OC(=O)[C@H](Oc1cc(ccc1Cl)Cn1c(=O)n(c2c1cc(cc2)C(F)(F)F)c1noc2c1cc(C)cc2)C	✓
OC(=O)[C@H](Oc1cc(ccc1Cl)Cn1c(=O)n(c2c1cc(cc2)C(F)(F)F)c1noc2c1cc(Cl)cc2)C	✓
OC(=O)[C@H](Oc1cc(ccc1Cl)Cn1c(=O)n(c2c1cc(cc2)C(F)(F)F)c1ccc(cc1)C(C)(C)C)C	✓
OC(=O)[C@H](Oc1cc(ccc1Cl)Cn1c(=O)n(c2c1cc(cc2)C(F)(F)F)c1nc2c(s1)cc(cc2)Cl)C	✓
OC(=O)[C@H](Oc1cc(ccc1Cl)Cn1c(=O)n(c2c1cc(cc2)C(F)(F)F)Cc1ccc(cc1)Cl)C	✓
OC(=O)[C@H](Oc1cccc(c1)Cn1c2cc(ccc2c(c1C)C(=O)c1ccc(cc1)Cl)OC(F)(F)F)C	✓
OC(=O)[C@]1(C)CCc2c(O1)cc(cc2)OCCCOc1ccc(cc1Cl)Oc1ccccc1	✓
Clc1cc(ccc1OCCCOc1ccc2c(c1)O[C@](CC2)(C)C(=O)O)OCC(F)(F)F	✓
OC(=O)CCc1ccc(cc1C)OCC[C@H](Oc1ccc(cc1c1ccccn1)C(F)(F)F)C	✓
OC(=O)CCc1ccc(cc1C)OCC[C@H](Oc1ccc(cc1Oc1ccccc1)C(F)(F)F)C	✓
OC(=O)CCc1ccc(cc1C)OCC[C@H](Oc1ccc(cc1c1ccccn1)Cl)C	✓
OC(=O)CCc1ccc(cc1C)OCC[C@H](Oc1ccc(cc1Oc1ccccc1)Cl)C	✓
OC(=O)CCc1ccc(cc1C)OCC[C@H](Oc1ccc(cc1Oc1ccccc1)OC(F)(F)F)C	✓
OC(=O)CCc1ccc(cc1C(F)(F)F)OCC[C@H](Oc1ccc(cc1Oc1ccccc1)Cl)C	✓
OC(=O)CCc1ccc(cc1F)OCC[C@H](Oc1ccc(cc1Oc1ccccc1)Cl)C	✓
OC(=N[C@H](c1cccc(c1Cl)Cl)C)c1ccc2c(c1)c(C)c(n2Cc1ccc(cc1)c1ccccc1)C	✓
C[C@@H](c1ccncc1)N=C(c1ccc2c(c1)c(C)c(n2Cc1ccc(cc1)c1ccccc1)C)O	✓
OC(=O)[C@@H](Oc1cccc(c1)C(n1c(C)c(c2c1ccc(c2)C(=O)N[C@H](c1cccc(c1)C1CC1)C)C)C)C	✓
Brc1ccc(cc1)[C@@H](NC(=O)c1ccc2c(c1)c(C)c(n2Cc1ccc(cc1)C1(CC1)C(=O)O)C)C	✓		✓
C[C@@H]([C@@H]1CCCN1C(=O)OCc1ccccc1)NC(=O)c1ccc2c(c1)c(C)c(n2Cc1ccc(cc1)c1ccccc1)C	✓
C[C@@H]([C@@H]1CCN(C1)C(=O)OCc1ccccc1)NC(=O)c1ccc2c(c1)c(C)c(n2Cc1ccc(cc1)c1ccccc1)C	✓
C[C@@H]([C@H]1CCCN1C(=O)OCc1ccccc1)NC(=O)c1ccc2c(c1)c(C)c(n2Cc1ccc(cc1)c1ccccc1)C	✓
O=C(c1ccc2c(c1)c(C)c(n2Cc1ccc(cc1)c1ccccc1)C)N[C@H](c1c(Cl)cccc1Cl)C	✓
O=C(c1ccc2c(c1)c(C)c(n2Cc1ccc(cc1)c1ccccc1)C)N[C@H](c1c(F)ccc(c1F)F)C	✓
O=C(c1ccc2c(c1)c(C)c(n2Cc1ccc(cc1)c1ccccc1)C)N[C@H](c1cc(ccc1C(F)(F)F)C(F)(F)F)C	✓
Fc1ccc(c(c1)[C@@H](NC(=O)c1ccc2c(c1)c(C)c(n2Cc1ccc(cc1)c1ccccc1)C)C)C(F)(F)F	✓
O=C(c1ccc2c(c1)c(C)c(n2Cc1ccc(cc1)c1ccccc1)C)N[C@H](c1ccc(c(c1)F)C(F)(F)F)C	✓
Cc1ccc(cc1)[C@@H](NC(=O)c1ccc2c(c1)c(C)c(n2Cc1ccc(cc1)c1ccccc1)C)C	✓
O=C(c1ccc2c(c1)c(C)c(n2Cc1ccc(cc1)c1ccccc1)C)N[C@H](c1ccc(cc1)C(C)(C)C)C	✓
O=C(c1ccc2c(c1)c(C)c(n2Cc1ccc(cc1)c1ccccc1)C)N[C@H](c1ccc(cc1)C(F)(F)F)C	✓
Clc1ccc(c(c1)C)[C@@H](NC(=O)c1ccc2c(c1)c(C)c(n2Cc1ccc(cc1)c1ccccc1)C)C	✓
O=C(c1ccc2c(c1)c(C)c(n2Cc1ccc(cc1)c1ccccc1)C)N[C@H](c1ccc(c(c1)F)F)C	✓
Fc1ccc(c(c1)C(F)(F)F)[C@@H](NC(=O)c1ccc2c(c1)c(C)c(n2Cc1ccc(cc1)c1ccccc1)C)C	✓
Fc1ccc(c(c1)F)[C@@H](NC(=O)c1ccc2c(c1)c(C)c(n2Cc1ccc(cc1)c1ccccc1)C)C	✓
O=C(c1ccc2c(c1)c(C)c(n2Cc1ccc(cc1)c1ccccc1)C)N[C@H](c1ccc(cc1)OC(F)(F)F)C	✓
O=C(c1ccc2c(c1)c(C)c(n2Cc1ccc(cc1)c1ccccc1)C)N[C@H](c1cccc(c1)C(C)(C)C)C	✓
O=C(c1ccc2c(c1)c(C)c(n2Cc1ccc(cc1)c1ccccc1)C)N[C@H](c1cccc(c1)C(F)(F)F)C	✓
O=C(c1ccc2c(c1)c(C)c(n2Cc1ccc(cc1)c1ccccc1)C)N[C@H](c1cccc(c1Cl)C(F)(F)F)C	✓
Clc1cccc(c1)[C@@H](NC(=O)c1ccc2c(c1)c(C)c(n2Cc1ccc(cc1)c1ccccc1)C)C	✓
O=C(c1ccc2c(c1)c(C)c(n2Cc1ccc(cc1)c1ccccc1)C)N[C@H](c1cccc(c1F)Cl)C	✓
Fc1cccc(c1)[C@@H](NC(=O)c1ccc2c(c1)c(C)c(n2Cc1ccc(cc1)c1ccccc1)C)C	✓
O=C(c1ccc2c(c1)c(C)c(n2Cc1ccc(cc1)c1ccccc1)C)N[C@H](c1cccc(c1Cl)F)C	✓
O=C(c1ccc2c(c1)c(C)c(n2Cc1ccc(cc1)c1ccccc1)C)N[C@H](c1cccc(c1F)F)C	✓
O=C(c1ccc2c(c1)c(C)c(n2Cc1ccc(cc1)c1ccccc1)C)N[C@H](c1cccc2c1cccc2)C	✓
O=C(c1ccc2c(c1)c(C)c(n2Cc1ccc(cc1)c1ccccc1)C)N[C@H](c1cccc2c1OCO2)C	✓
O=C(c1ccc2c(c1)c(C)c(n2Cc1ccc(cc1)c1ccccc1)C)N[C@H](c1ccccc1F)C	✓
O=C(c1ccc2c(c1)c(C)c(n2Cc1ccc(cc1)c1ccccc1)C)N[C@H](c1ccccn1)C	✓
O=C(c1ccc2c(c1)c(C)c(n2Cc1ccc(cc1)c1ccccc1)C)N[C@H](c1ccnc2c1cccc2)C	✓
O=C(c1ccc2c(c1)c(C)c(n2Cc1ccc(cc1)c1ccccc1)C)N[C@H](c1ccncc1Cl)C	✓
N#Cc1ccccc1c1ccc(cc1)Cn1c2ccc(cc2c(c1C)C)C(=O)N[C@H](c1ccc(cc1)Br)C	✓
O=C(c1ccc2c(c1)c(C)c(n2Cc1ccc(cc1)c1ccccc1C(=O)O)C)N[C@H](c1c(F)cccc1C(F)(F)F)C	✓
O=C(c1ccc2c(c1)c(C)c(n2Cc1ccc(cc1)c1ccccc1C(=O)O)C)N[C@H](c1c(F)cncc1F)C	✓
Cc1ccc(c(c1)[C@@H](NC(=O)c1ccc2c(c1)c(C)c(n2Cc1ccc(cc1)c1ccccc1C(=O)O)C)C)F	✓
O=C(c1ccc2c(c1)c(C)c(n2Cc1ccc(cc1)c1ccccc1C(=O)O)C)N[C@H](c1cc(ccc1Cl)C(F)(F)F)C	✓
O=C(c1ccc2c(c1)c(C)c(n2Cc1ccc(cc1)c1ccccc1C(=O)O)C)N[C@H](c1cc(ccc1F)C(F)(F)F)C	✓
O=C(c1ccc2c(c1)c(C)c(n2Cc1ccc(cc1)c1ccccc1C(=O)O)C)N[C@H](c1nccc(c1)C1CC1)C	✓
Clc1cc(Cl)cc(c1)[C@@H](NC(=O)c1ccc2c(c1)c(C)c(n2Cc1ccc(cc1)c1ccccc1C(=O)O)C)C	✓
Clc1ccnc(c1)[C@@H](NC(=O)c1ccc2c(c1)c(C)c(n2Cc1ccc(cc1)c1ccccc1C(=O)O)C)C	✓
O=C(c1ccc2c(c1)c(C)c(n2Cc1ccc(cc1)c1ccccc1C(=O)O)C)N[C@H](c1cc(F)c(cc1F)F)C	✓
Brc1ccc(cc1)[C@@H](NC(=O)c1ccc2c(c1)c(C)c(n2Cc1ccc(cc1)c1ccccc1C(=O)O)C)C	✓
Brc1ccc(nc1)[C@@H](NC(=O)c1ccc2c(c1)c(C)c(n2Cc1ccc(cc1)c1ccccc1C(=O)O)C)C	✓
Cc1ccc(cc1)[C@@H](NC(=O)c1ccc2c(c1)c(C)c(n2Cc1ccc(cc1)c1ccccc1C(=O)O)C)C	✓
O=C(c1ccc2c(c1)c(C)c(n2Cc1ccc(cc1)c1ccccc1C(=O)O)C)N[C@H](c1ccc(cc1)[N+](=O)[O-])C	✓
O=C(c1ccc2c(c1)c(C)c(n2Cc1ccc(cc1)c1ccccc1C(=O)O)C)N[C@H](c1ccc(cc1)C(C)(C)C)C	✓
O=C(c1ccc2c(c1)c(C)c(n2Cc1ccc(cc1)c1ccccc1C(=O)O)C)N[C@H](c1ccc(cc1)C1CC1)C	✓
O=C(c1ccc2c(c1)c(C)c(n2Cc1ccc(cc1)c1ccccc1C(=O)O)C)N[C@H](c1ccc(cc1)S(=O)(=O)C)C	✓
O=C(c1ccc2c(c1)c(C)c(n2Cc1ccc(cc1)c1ccccc1C(=O)O)C)N[C@H](c1ccc(cc1C(F)(F)F)C(F)(F)F)C	✓
O=C(c1ccc2c(c1)c(C)c(n2Cc1ccc(cc1)c1ccccc1C(=O)O)C)N[C@H](c1ccc(cc1F)C(F)(F)F)C	✓
O=C(c1ccc2c(c1)c(C)c(n2Cc1ccc(cc1)c1ccccc1C(=O)O)C)N[C@H](c1ccc(c(c1)C(F)(F)F)Cl)C	✓
O=C(c1ccc2c(c1)c(C)c(n2Cc1ccc(cc1)c1ccccc1C(=O)O)C)N[C@H](c1ccc(c(c1)Cl)Cl)C	✓
Clc1ccc(cc1)[C@@H](NC(=O)c1ccc2c(c1)c(C)c(n2Cc1ccc(cc1)c1ccccc1C(=O)O)C)C	✓
Clc1ccc(c(c1)Cl)[C@@H](NC(=O)c1ccc2c(c1)c(C)c(n2Cc1ccc(cc1)c1ccccc1C(=O)O)C)C	✓
Clc1ccc(cn1)[C@@H](NC(=O)c1ccc2c(c1)c(C)c(n2Cc1ccc(cc1)c1ccccc1C(=O)O)C)C	✓
O=C(c1ccc2c(c1)c(C)c(n2Cc1ccc(cc1)c1ccccc1C(=O)O)C)N[C@H](c1ccc(cn1)C1CC1)C	✓
Fc1ccc(cc1)[C@@H](NC(=O)c1ccc2c(c1)c(C)c(n2Cc1ccc(cc1)c1ccccc1C(=O)O)C)C	✓
Nc1ccc(cc1)[C@@H](NC(=O)c1ccc2c(c1)c(C)c(n2Cc1ccc(cc1)c1ccccc1C(=O)O)C)C	✓
O=C(c1ccc2c(c1)c(C)c(n2Cc1ccc(cc1)c1ccccc1C(=O)O)C)N[C@H](c1ccc(nc1)C(F)(F)F)C	✓
O=C(c1ccc2c(c1)c(C)c(n2Cc1ccc(cc1)c1ccccc1C(=O)O)C)N[C@H](c1ccc(nc1)C1CC1)C	✓
O=C(c1ccc2c(c1)c(C)c(n2Cc1ccc(cc1)c1ccccc1C(=O)O)C)N[C@H](c1ccc(cc1)OC(C)(C)C)C	✓
O=C(c1ccc2c(c1)c(C)c(n2Cc1ccc(cc1)c1ccccc1C(=O)O)C)N[C@H](c1ccc2c(c1)CCO2)C	✓
Brc1cccc(c1)[C@@H](NC(=O)c1ccc2c(c1)c(C)c(n2Cc1ccc(cc1)c1ccccc1C(=O)O)C)C	✓
Brc1cccc(n1)[C@@H](NC(=O)c1ccc2c(c1)c(C)c(n2Cc1ccc(cc1)c1ccccc1C(=O)O)C)C	✓
Cc1cccc(c1)[C@@H](NC(=O)c1ccc2c(c1)c(C)c(n2Cc1ccc(cc1)c1ccccc1C(=O)O)C)C	✓
O=C(c1ccc2c(c1)c(C)c(n2Cc1ccc(cc1)c1ccccc1C(=O)O)C)N[C@H](c1cccc(c1)C(C)(C)C)C	✓
O=C(c1ccc2c(c1)c(C)c(n2Cc1ccc(cc1)c1ccccc1C(=O)O)C)N[C@H](c1cccc(c1)C(O)(C)C)C	✓
O=C(c1ccc2c(c1)c(C)c(n2Cc1ccc(cc1)c1ccccc1C(=O)O)C)N[C@H](c1cccc(c1)C(F)(F)F)C	✓
O=C(c1ccc2c(c1)c(C)c(n2Cc1ccc(cc1)c1ccccc1C(=O)O)C)N[C@H](c1cccc(c1)C1CC1)C	✓
O=C(c1ccc2c(c1)c(C)c(n2Cc1ccc(cc1)c1ccccc1C(=O)O)C)N[C@H](c1cccc(c1F)C(F)(F)F)C	✓
Clc1cccc(c1)[C@@H](NC(=O)c1ccc2c(c1)c(C)c(n2Cc1ccc(cc1)c1ccccc1C(=O)O)C)C	✓
O=C(c1ccc2c(c1)c(C)c(n2Cc1ccc(cc1)c1ccccc1C(=O)O)C)N[C@H](c1cccc(n1)C1CC1)C	✓
C[C@@H](C1CCCCC1)NC(=O)c1ccc2c(c1)c(C)c(n2Cc1ccc(cc1)c1ccccc1C(=O)O)C	✓
O=C(c1ccc2c(c1)c(C)c(n2Cc1ccc(cc1)c1ccccc1C(=O)O)C)N[C@H](c1ccccc1Br)C	✓
O=C(c1ccc2c(c1)c(C)c(n2Cc1ccc(cc1)c1ccccc1C(=O)O)C)N[C@H](c1ccccc1C)C	✓
O=C(c1ccc2c(c1)c(C)c(n2Cc1ccc(cc1)c1ccccc1C(=O)O)C)N[C@H](c1ccccc1C(F)(F)F)C	✓
O=C(c1ccc2c(c1)c(C)c(n2Cc1ccc(cc1)c1ccccc1C(=O)O)C)N[C@H](c1ccccc1OC(F)(F)F)C	✓
C[C@@H](C1CCN(CC1)C(=O)NCc1ccccc1)NC(=O)c1ccc2c(c1)c(C)c(n2Cc1ccc(cc1)c1ccccc1C(=O)O)C	✓
C[C@@H](C1CCN(CC1)C(=O)OCc1ccccc1)NC(=O)c1ccc2c(c1)c(C)c(n2Cc1ccc(cc1)c1ccccc1C(=O)O)C	✓
Brc1nccc(c1)[C@@H](NC(=O)c1ccc2c(c1)c(C)c(n2Cc1ccc(cc1)c1ccccc1C(=O)O)C)C	✓
O=C(c1ccc2c(c1)c(C)c(n2Cc1ccc(cc1)c1ccccc1C(=O)O)C)N[C@H](c1ccnc(c1)C1CC1)C	✓
C[C@@H](C1COc2c(O1)cccc2)NC(=O)c1ccc2c(c1)c(C)c(n2Cc1ccc(cc1)c1ccccc1C(=O)O)C	✓
C[C@@H](c1cccc(c1)C1CC1)NC(=O)c1ccc2c(c1)c(C)c(n2Cc1ccc(cc1)c1ccccc1c1[nH]nnn1)C	✓
O=C(c1ccc2c(c1)c(C)c(n2Cc1ccc(cc1)c1cccnc1)C)N[C@H](c1ccc(cc1)[N+](=O)[O-])C	✓
OC(=O)COc1ccc(cc1)Cn1c(C)c(c2c1ccc(c2)C(=O)N[C@H](c1ccc(cc1)C(C)(C)C)C)C	✓
OC(=O)COc1ccc(cc1)Cn1c2ccc(cc2c(c1C)C)C(=O)N[C@H](c1cccc(c1)C1CC1)C	✓
O=C(c1ccc2c(c1)c(C)c(n2Cc1cccc(c1)C(=O)O)C)N[C@H](c1cccc(c1)C1CC1)C	✓
N#CC(c1cccc(c1)Cn1c(C)c(c2c1ccc(c2)C(=O)N[C@H](c1cccc(c1)C1CC1)C)C)(C)C	✓
NC(=O)C(c1cccc(c1)Cn1c(C)c(c2c1ccc(c2)C(=O)N[C@H](c1cccc(c1)C1CC1)C)C)(C)C	✓
OC(=O)C1(CC1)c1cccc(c1)Cn1c(C)c(c2c1ccc(c2)C(=O)N[C@H](c1cccc(c1)C1CC1)C)C	✓		✓
OC(=O)C(Oc1cccc(c1)Cn1c(C)c(c2c1ccc(c2)C(=O)N[C@H](c1ccc(cc1)C(C)(C)C)C)C)(C)C	✓
N#CCOc1cccc(c1)Cn1c(C)c(c2c1ccc(c2)C(=O)N[C@H](c1ccc(cc1)C(C)(C)C)C)C	✓
OC(=O)COc1cccc(c1)Cn1c(C)c(c2c1ccc(c2)C(=O)N[C@H](c1ccc(cc1)C(C)(C)C)C)C	✓
OC(=O)COc1cccc(c1)Cn1c(C)c(c2c1ccc(c2)C(=O)N[C@H](c1cccc(c1)C1CC1)C)C	✓
Brc1ccc(cc1)[C@@H](NC(=O)c1ccc2c(c1)c(C)cn2Cc1ccc(cc1)c1ccccc1C(=O)O)C	✓
O=C(c1ccc2c(c1)c(C)cn2Cc1ccc(cc1)c1ccccc1C(=O)O)N[C@H](c1ccc(cc1)[N+](=O)[O-])C	✓
Brc1ccc(cc1)[C@@H](NC(=O)c1ccc2c(c1)cc(n2Cc1ccc(cc1)c1ccccc1C(=O)O)C)C	✓
Oc1ccc(cc1)c1ccc(cc1)Cn1ccc2c1ccc(c2)C(=O)N[C@H](c1ccc(cc1)[N+](=O)[O-])C	✓
Brc1ccc(cc1)[C@@H](NC(=O)c1ccc2c(c1)ccn2Cc1ccc(cc1)c1ccccc1C(=O)O)C	✓
O=C(c1ccc2c(c1)ccn2Cc1ccc(cc1)c1ccccc1C(=O)O)N[C@H](c1ccc(cc1)[N+](=O)[O-])C	✓
Brc1ccc(cc1)[C@@H](NC(=O)c1ccc2c(c1)ccn2Cc1ccc(cc1F)F)C	✓
Fc1ccc(c(c1)F)Cn1ccc2c1ccc(c2)C(=O)N[C@H](c1ccc(cc1)[N+](=O)[O-])C	✓
Fc1ccc(cc1)[C@@H](NC(=O)c1ccc2c(c1)ccn2Cc1ccc(cc1F)F)C	✓
OC(=O)COc1ccc(c2c1CCCC2)Sc1ccc(cc1OCC#C[C@@H](O)C)COc1ccc(cc1)C(F)(F)F						✓	✓
Clc1cc(cc(c1)Cn1c(C)c(c2c1ccc(c2)C(=O)N[C@H](c1ccc(cc1)C(C)(C)C)C)C)O[C@H](C(=O)O)C	✓
Clc1cc(cc(c1)Cn1c(C)c(c2c1ccc(c2)C(=O)N[C@H](c1cccc(c1)C1CC1)C)C)O[C@H](C(=O)O)C	✓
Clc1cc(cc(c1)O[C@H](C(=O)O)C)Oc1c2cc(ccc2n(c1C)c1noc2c1ccc(c2)Cl)OC(F)(F)F	✓
OC(=O)[C@@H](Oc1cc(ccc1Cl)Cn1c(C)c(c2c1ccc(c2)C(=O)N[C@H](c1ccc(cc1)Br)C)C)C	✓
OC(=O)[C@@H](Oc1cc(ccc1Cl)Cn1c(C)c(c2c1ccc(c2)C(=O)N[C@H](c1ccc(cc1)C(C)(C)C)C)C)C	✓
OC(=O)[C@@H](Oc1cc(ccc1F)Cn1c(C)c(c2c1ccc(c2)C(=O)N[C@H](c1ccc(cc1)C(C)(C)C)C)C)C	✓
OC(=O)[C@@H](Oc1cc(ccc1Cl)Cn1c(C)c(c2c1ccc(c2)C(=O)N[C@H](c1cccc(c1)C(C)(C)C)C)C)C	✓
OC(=O)[C@@H](Oc1cc(ccc1Cl)Cn1c(C)c(c2c1ccc(c2)C(=O)N[C@H](c1cccc(c1)C1CC1)C)C)C	✓
OC(=O)[C@@H](Oc1cc(ccc1F)Cn1c(C)c(c2c1ccc(c2)C(=O)N[C@H](c1cccc(c1)C1CC1)C)C)C	✓
OC(=O)[C@@H](Oc1cc(ccc1Cl)Cn1c2nc(Cl)ccc2c(c1C)Oc1ccc(cc1)Cl)C	✓
OC(=O)[C@@H](Oc1cc(ccc1Cl)Cn1c2nc(F)ccc2c(c1C)Oc1ccc(cc1)Cl)C	✓
OC(=O)[C@@H](Oc1cc(ccc1F)Cn1c2nc(F)ccc2c(c1C)Oc1ccc(cc1)Cl)C	✓
OC(=O)[C@@H](Oc1cc(ccc1Cl)Cn1c2nc(ccc2c(c1C)Oc1ccc(cc1)Cl)C(F)(F)F)C	✓
OC(=O)[C@@H](Oc1cc(ccc1Cl)Cn1c2cc(ccc2c(c1C)Oc1ccc(cc1)Cl)OC(F)(F)F)C	✓
OC(=O)[C@@H](Oc1cc(ccc1F)Cn1c2ncccc2c(c1C)Oc1ccc(cc1)Cl)C	✓
OC(=O)[C@@H](Oc1cc(ccc1Cl)Oc1c(C)n(c2c1cc(cc2)OC(F)(F)F)c1noc2c1ccc(c2)Cl)C	✓
OC(=O)[C@@H](Oc1ccc(c(c1)Cn1c(C)c(c2c1ccc(c2)C(=O)N[C@H](c1ccc(cc1)Br)C)C)Cl)C	✓
C[C@@H](C(=O)O)Oc1ccc(c(c1)Cn1c(C)c(c2c1ccc(c2)C(=O)N[C@H](c1ccc(cc1)C(C)(C)C)C)C)Cl	✓
OC(=O)[C@@H](Oc1ccc(c(c1)Cn1c(C)c(c2c1ccc(c2)C(=O)N[C@H](c1cccc(c1)C(C)(C)C)C)C)Cl)C	✓
OC(=O)[C@@H](Oc1ccc(c(c1)Cn1c(C)c(c2c1ccc(c2)C(=O)N[C@H](c1cccc(c1)C1CC1)C)C)Cl)C	✓
OC(=O)[C@@H](Oc1ccc(c(c1)Cn1c2nc(F)ccc2c(c1C)Oc1ccc(cc1)Cl)Cl)C	✓
OC(=O)[C@@H](Oc1ccc(c(c1)Cn1c2ncccc2c(c1C)Oc1ccc(cc1)Cl)Cl)C	✓
OC(=O)[C@@H](Oc1ccc(c(c1)Oc1c(C)n(c2c1cc(cc2)OC(F)(F)F)c1noc2c1ccc(c2)Cl)Cl)C	✓
OC(=O)[C@@H](Oc1ccc(cc1Cl)Cn1c(C)c(c2c1ccc(c2)C(=O)N[C@H](c1ccc(cc1)C(C)(C)C)C)C)C	✓
OC(=O)[C@@H](Oc1ccc(cc1Cl)Cn1c2ccc(cc2c(c1C)C)C(=O)N[C@H](c1cccc(c1)C1CC1)C)C	✓
C[C@@H](C(=O)O)Oc1ccc(c(c1)Cn1c(C)c(c2c1ccc(c2)C(=O)N[C@H](c1ccc(cc1)C(C)(C)C)C)C)F	✓
OC(=O)[C@@H](Oc1ccc(c(c1)Cn1c2ncccc2c(c1C)Oc1ccc(cc1)Cl)F)C	✓
OC(=O)[C@@H](Oc1cccc(c1)C(n1c(C)c(c2c1ccc(c2)C(=O)N[C@H](c1ccc(cc1)C(C)(C)C)C)C)C)C	✓
OC(=O)[C@@H](Oc1cccc(c1)Cc1c(C)n(c2c1cc(cc2)OC(F)(F)F)c1ccccn1)C	✓
OC(=O)[C@@H](Oc1cccc(c1)Cn1c2cc(ccc2c(c1C)C(=O)c1ccc(cc1)Cl)OC(F)(F)F)C	✓
OC(=O)[C@@H](Oc1cccc(c1)Cn1c(C)c(c2c1ccc(c2)C(=O)N[C@H](c1ccc(cc1)Br)C)C)C	✓
OC(=O)[C@@H](Oc1cccc(c1)Cn1c(C)c(c2c1ccc(c2)C(=O)N[C@H](c1ccc(cc1)C(C)(C)C)C)C)C	✓
OC(=O)[C@@H](Oc1cccc(c1Cl)Cn1c(C)c(c2c1ccc(c2)C(=O)N[C@H](c1ccc(cc1)C(C)(C)C)C)C)C	✓
OC(=O)[C@@H](Oc1cccc(c1)Cn1c(C)c(c2c1ccc(c2)C(=O)N[C@H](c1ccc(cc1)C(F)(F)F)C)C)C	✓
OC(=O)[C@@H](Oc1cccc(c1)Cn1c(C)c(c2c1ccc(c2)C(=O)N[C@H](c1ccc(cc1)Cl)C)C)C	✓
OC(=O)[C@@H](Oc1cccc(c1)Cn1c(C)c(c2c1ccc(c2)C(=O)N[C@H](c1cccc(c1)C(C)(C)C)C)C)C	✓
OC(=O)[C@@H](Oc1cccc(c1)Cn1c(C)c(c2c1ccc(c2)C(=O)N[C@H](c1cccc(c1)C1CC1)C)C)C	✓
OC(=O)[C@@H](Oc1cccc(c1Cl)Cn1c(C)c(c2c1ccc(c2)C(=O)N[C@H](c1cccc(c1)C1CC1)C)C)C	✓
OC(=O)[C@@H](Oc1cccc(c1)Cn1c2ccc(cc2c(c1C)C)C(=O)N[C@H](c1cccc(c1)Cl)C)C	✓
OC(=O)[C@@H](Oc1cccc(c1)Cn1c2ccc(cc2c(c1C)C)C(=O)N[C@H](c1ccccc1Cl)C)C	✓
OC(=O)[C@@H](Oc1cccc(c1)Oc1c(C)n(c2c1cc(cc2)OC(F)(F)F)c1noc2c1ccc(c2)Cl)C	✓
C/C(=C\C(=O)c1ccccc1)/N[C@H](C(=O)N)Cc1ccc(cc1)OCc1ccccc1						✓
C/C(=C\C(=O)c1ccccc1)/N[C@H](C(=O)O)Cc1ccc(cc1)OCc1ccccc1						✓
OC(=O)[C@H](Cc1ccc(cc1)OCc1ccccc1)/N=C(/C=C(\O)/C)\C						✓	✓
C/C(=C/C(=O)c1ccccc1)/N[C@H](C(=O)O)Cc1ccc(cc1)OCCc1nc(oc1C)c1ccccc1						✓	✓
C/C(=N\[C@H](C(=O)N)Cc1ccc(cc1)OCc1ccccc1)/C=C(/c1ccccc1)\O						✓	✓
C/C(=N\[C@H](C(=O)O)Cc1ccc(cc1)OCc1ccccc1)/C=C(/c1ccccc1)\O						✓	✓
O=C1SC(C(=O)N1)Cc1cccc(c1)OCCO/N=C(\c1ccc(cc1)c1ccccc1)/C	✓	✓
C/C=C/CC(=O)N(CCOc1ccc(cc1)CC1SC(=O)NC1=O)C						✓	✓	✓
C=CCC/C=C/C(=O)NCCOc1ccc(cc1)CC1SC(=O)NC1=O						✓	✓	✓
CC#CCOc1cc(ccc1Sc1ccc(c2c1CCCC2)OCC(=O)O)COc1ccc(cc1)C(F)(F)F						✓	✓
C/C(=C\Cc1c(O)cc(cc1O)/C=C/c1cc(F)cc(c1)F)/CCC=C(C)C	✓
O=Cc1ccc(cc1)/C=C/c1cc(O)c(c(c1)O)C/C=C(/CCC=C(C)C)\C	✓
N#Cc1ccc(cc1)/C=C/c1cc(O)c(c(c1)O)C/C=C(/CCC=C(C)C)\C	✓
C/C(=C\Cc1c(O)cc(cc1O)/C=C/c1ccc(cc1)C(F)(F)F)/CCC=C(C)C	✓
C/C(=C\Cc1c(O)cc(cc1O)/C=C/c1ccc(cc1)Cl)/CCC=C(C)C	✓
C/C(=C\Cc1c(O)cc(cc1O)/C=C/c1ccc(cc1)F)/CCC=C(C)C	✓
C/C(=C\Cc1c(O)cc(cc1O)/C=C/c1ccc(cc1)O)/CCC=C(C)C	✓
C/C(=C\Cc1c(O)cc(cc1O)/C=C/c1cccc(c1)C(F)(F)F)/CCC=C(C)C	✓
C/C(=C\Cc1c(O)cc(cc1O)/C=C/c1ccccc1)/CCC=C(C)C	✓
C/C(=C\Cc1c(O)cc(cc1O)/C=C/c1cscc1)/CCC=C(C)C	✓
C/C(=C\Cc1c(O)cc(cc1O)/C=C/c1cocc1)/CCC=C(C)C	✓
OC(=O)[C@H](Cc1ccc(cc1)OCc1ccccc1)N/C(=C/C(=O)C)/C						✓
Clc1ccc(c(c1)Cl)S(=O)(=O)Nc1cc(Cl)c(c(c1)C(=O)C)Oc1cncc(c1)Cl	✓
Clc1ccc(c(c1)Cl)S(=O)(=O)Nc1ccc(c(c1)C(=O)C)Oc1cnc2c(c1)cccc2	✓
Clc1ccc(c(c1)Cl)S(=O)(=O)Nc1ccc(c(c1)C(=O)C)Oc1cncc(c1)Cl	✓
OC(=O)[C@@H](Nc1ccccc1C(=O)c1ccccc1)Cc1ccc(cc1)OCCOc1ccc(cc1)C(=O)C						✓	✓
OC(=O)[C@@H](Nc1ccccc1C(=O)C)Cc1ccc(cc1)OCCc1nc(oc1C)c1ccccc1	✓
Clc1ccc(c(c1)Cl)S(=O)(=O)Nc1cc(Cl)c(c(c1)Cl)Oc1cncc(c1)C(=O)C	✓
CC(=O)N[C@H](C(=O)O)Cc1ccc(cc1)OCCc1nc(oc1C)c1ccccc1						✓	✓
CC(=O)NC[C@@H](Nc1ccccc1C(=O)c1ccccc1)Cc1ccc(cc1)OCCc1nc(oc1C)c1ccccc1	✓					✓	✓
CC(=O)Nc1ccc(cc1)OS(=O)(=O)/C=C/c1ccccc1	✓
CC(=O)NCCOC(=O)C(c1ccc(cc1)Cl)Oc1cccc(c1)C(F)(F)F	✓		✓
C=CCn1cc(s/c/1=N\C(=O)C(C)(C)C)[N+](=O)[O-]	✓
Clc1ccc2c(c1)c(Oc1cc(cc(c1)C(F)(F)F)C(F)(F)F)c(n2c1ccc(cc1)C(C)(C)C)C(=O)O	✓
OC(=O)c1c(Oc2ccc(cc2)c2[nH]cc(c2)C(F)(F)F)c2c(n1c1ccc(cc1)C(C)(C)C)nccc2	✓
Clc1ccc2c(c1)c(Oc1ccc(c(c1)C(F)(F)F)Cl)c(n2c1ccc(cc1)C(C)(C)C)C(=O)O	✓
Clc1ccc(cc1)Oc1c(C(=O)O)n(c2c1ccc(c2)OC(F)(F)F)c1ccc(cc1)C(C)(C)C	✓
OC(=O)c1c(Oc2ccc(cc2)OC(F)(F)F)c2c(n1c1ccc(cc1)C(C)(C)C)cccc2	✓
Clc1ccc2c(c1)c(Oc1cccc(c1)C(F)(F)F)c(n2c1ccc(cc1)C(C)(C)C)C(=O)O	✓
Oc1ccc2c(c1)c(Oc1cccc(c1)C(F)(F)F)c(n2c1ccc(cc1)C(C)(C)C)C(=O)O	✓
OC(=O)c1n(c2ccc(cc2)C(C)(C)C)c2c(c1Oc1cccc(c1)C(F)(F)F)cc(cc2)Oc1[nH]cc(c1)C(F)(F)F	✓
Clc1c[nH]c(c1)Oc1ccc2c(c1)c(Oc1cccc(c1)C(F)(F)F)c(n2c1ccc(cc1)C(C)(C)C)C(=O)O	✓
OC(=O)c1c(Oc2cccc(c2)C(F)(F)F)c2c(n1c1ccc(cc1)C(C)(C)C)ccc(c2)Oc1ccc[nH]1	✓
Clc1ccc2c(c1)n(c1ccc(cc1)C(C)(C)C)c(c2Oc1cccc(c1)C(F)(F)F)C(=O)O	✓
Clc1ccc2c(n1)n(c1ccc(cc1)C(C)(C)C)c(c2Oc1cccc(c1)C(F)(F)F)C(=O)O	✓
OC(=O)c1c(Oc2cccc(c2)C(F)(F)F)c2c(n1c1ccc(cc1)C(C)(C)C)cccc2	✓
OC(=O)c1c(Oc2cccc(c2)C(F)(F)F)c2c(n1c1ccc(cc1)C(C)(C)C)nccc2	✓
Clc1ccc2c(n1)n(c1ccc(cc1)C(C)(C)C)c(c2Oc1cccc(c1)c1[nH]cc(c1)C(F)(F)F)C(=O)O	✓
Clc1ccc2c(n1)n(c1ccc(cc1)C(C)(C)C)c(c2Oc1cccc(c1)S(=O)(=O)C)C(=O)O	✓
Oc1cccc(c1)Oc1c(C(=O)O)n(c2c1cccc2)c1ccc(cc1)C(C)(C)C	✓
O=C(c1cc2c(n1Cc1ccc(cc1)C(C)(C)C)cccc2)NS(=O)(=O)c1cccc(c1)C(F)(F)F	✓
CC(c1ccc(cc1)OCC1OC1)(c1ccc(cc1)OCC1OC1)C	✓
OC(=O)C(Cc1ccc(cc1)OCCCOc1ccc2c(c1)OC(C=C2c1cccc(c1)C(F)(F)F)(C)C)(C)C	✓
Fc1ccc(c(c1)F)Cn1ccc2c1ccc(c2)C(=O)NC(c1ccccc1)(C)C	✓
OC(=O)COc1ccc(c2c1CCCC2)Sc1ccc(cc1OCC#CC(O)(C)C)COc1ccc(cc1)C(F)(F)F						✓	✓
Clc1ccc(cc1)C(=O)c1ccc(cc1)OC(C(=O)O)(C)C	✓
Fc1ccc(cc1)Oc1ccc(c(c1)Cl)OCCCCOc1ccc(cc1)OC(C(=O)O)(C)C	✓
Fc1ccc(cc1)Oc1ccc(c(c1)Cl)OCCCOc1ccc(cc1)OC(C(=O)O)(C)C	✓
O=C(N(CCc1ccc(cc1)SC(C(=O)O)(C)C)CCCCC1CCCCC1)NC1CCCCC1				✓
CC([C@H](C(=O)O)Oc1cccc(c1)Cn1c2cc(ccc2c(c1C)C(=O)c1ccc(cc1)Cl)OC(F)(F)F)C	✓
CC([C@@H](c1cccc(c1)C(C)C)NC(=O)c1ccc2c(c1)c(C)c(n2Cc1ccc(cc1)c1ccccc1)C)C	✓
CC([C@@H](c1cccc(c1)C(C)C)NC(=O)c1ccc2c(c1)c(C)c(n2Cc1ccc(cc1)c1ccccc1C(=O)O)C)C	✓
CC([C@@H](C(=O)O)Oc1cccc(c1)Cn1c2cc(ccc2c(c1C)C(=O)c1ccc(cc1)Cl)OC(F)(F)F)C	✓
O=C(C(C)C)O[C@@H]1C[C@@]2(C)O[C@](C[C@@H]2O)([C@H](C[C@@H]2[C@@H]1C(=C)C(=O)O2)C)O	✓
O=C(C(C)C)O[C@@H]1C[C@]2(C)CC[C@@](O2)([C@H](C[C@@H]2[C@@H]1C(=C)C(=O)O2)C)O	✓
CC(C(C(=O)O)Cc1ccc(nc1)OCCc1nc(oc1C)c1ccccc1)C						✓	✓
OC(=O)[C@@H](Nc1ccccc1C(=O)c1ccccc1)Cc1ccc(cc1)OCC(c1ccccc1)C(C)C						✓	✓
CC(C[C@@H](C(=O)O)NC(=O)[C@H](Cc1c[nH]c2c1cccc2)N)C	✓
CC(C[C@@H](c1cccc(c1)C(C)C)NC(=O)c1ccc2c(c1)c(C)c(n2Cc1ccc(cc1)c1ccccc1)C)C	✓
CC(C[C@@H](c1cccc(c1)C(C)C)NC(=O)c1ccc2c(c1)c(C)c(n2Cc1ccc(cc1)c1ccccc1C(=O)O)C)C	✓
OC(=O)C(Cc1ccc(cc1)OCCCOc1cc2OC(C)(C)C=C(c2cc1Cl)C(C)C)(C)C	✓
OC(=O)C1(CC1)c1ccc(cc1)Cn1c(C)c(c2c1ccc(c2)C(=O)N[C@H](c1ccc(cc1)C(C)C)C)C	✓		✓
O=C(c1ccc2c(c1)c(C)c(n2Cc1ccc(cc1)c1ccccc1)C)N[C@H](c1ccc(cc1)C(C)C)C	✓
O=C(c1ccc2c(c1)c(C)c(n2Cc1ccc(cc1)c1ccccc1C(=O)O)C)N[C@H](c1ccc(cc1)C(C)C)C	✓
OC(=O)[C@H](Cc1ccc(c2c1scc2)OCCc1nc(oc1C)c1ccc(cc1)C(C)C)OCC1CC1	✓
OC(=O)CN(C(=O)Oc1ccc(cc1)C)Cc1cccc(c1)OCc1nc(oc1C)c1ccc(cc1)C(C)C	✓
O=C(c1ccc2c(c1)c(C)c(n2Cc1ccc(cc1)c1ccccc1C(=O)O)C)NCc1ccc(cc1)C(C)C	✓
CC(c1ccc(cc1)COc1ccc(cc1)C[C@@H](C(=O)O)Nc1ccccc1C(=O)c1ccccc1)C						✓	✓
OC(=O)[C@@]1(C)CCc2c(O1)cc(cc2)OCCCOc1ccc(cc1Cl)C(C)C	✓
O=C(c1ccc2c(c1)c(C)c(n2Cc1ccc(cc1)c1ccccc1)C)N[C@H](c1cccc(c1)C(C)C)C1CC1	✓
O=C(c1ccc2c(c1)c(C)c(n2Cc1ccc(cc1)c1ccccc1C(=O)O)C)N[C@H](c1cccc(c1)C(C)C)C1CC1	✓
OC(=O)[C@@H](Oc1ccc(c(c1)Cn1c(C)c(c2c1ccc(c2)C(=O)N[C@H](c1cccc(c1)C(C)C)C)C)Cl)C	✓
OC(=O)C1(CC1)c1ccc(cc1)Cn1c(C)c(c2c1ccc(c2)C(=O)N[C@H](c1cccc(c1)C(C)C)C)C	✓		✓
O=C(c1ccc2c(c1)c(C)c(n2Cc1ccc(cc1)c1ccccc1)C)N[C@H](c1cccc(c1)C(C)C)C	✓
O=C(c1ccc2c(c1)c(C)c(n2Cc1ccc(cc1)c1ccccc1C(=O)N)C)N[C@H](c1cccc(c1)C(C)C)C	✓
C[C@@H](c1cccc(c1)C(C)C)NC(=O)c1ccc2c(c1)c(C)c(n2Cc1ccc(cc1)c1ccccc1C(=O)N(C)C)C	✓
C[C@@H](c1cccc(c1)C(C)C)NC(=O)c1ccc2c(c1)c(C)c(n2Cc1ccc(cc1)c1ccccc1C(=O)NC1CC1)C	✓
OCCNC(=O)c1ccccc1c1ccc(cc1)Cn1c2ccc(cc2c(c1C)C)C(=O)N[C@H](c1cccc(c1)C(C)C)C	✓
ONC(=O)c1ccccc1c1ccc(cc1)Cn1c(C)c(c2c1ccc(c2)C(=O)N[C@H](c1cccc(c1)C(C)C)C)C	✓
C[C@@H](c1cccc(c1)C(C)C)NC(=O)c1ccc2c(c1)c(C)c(n2Cc1ccc(cc1)c1ccccc1C(=O)NS(=O)(=O)C)C	✓
O=C(c1ccc2c(c1)c(C)c(n2Cc1ccc(cc1)c1ccccc1C(=O)O)C)N[C@H](c1cccc(c1)C(C)C)C	✓
O=c1[nH]nc(o1)c1ccccc1c1ccc(cc1)Cn1c(C)c(c2c1ccc(c2)C(=O)N[C@H](c1cccc(c1)C(C)C)C)C	✓
O=c1onc([nH]1)c1ccccc1c1ccc(cc1)Cn1c(C)c(c2c1ccc(c2)C(=O)N[C@H](c1cccc(c1)C(C)C)C)C	✓
C[C@@H](c1cccc(c1)C(C)C)NC(=O)c1ccc2c(c1)c(C)c(n2Cc1ccc(cc1)c1ccccc1c1nn[nH]n1)C	✓
OC(=O)[C@@H](Oc1cc(ccc1Cl)Cn1c(C)c(c2c1ccc(c2)C(=O)N[C@H](c1cccc(c1)C(C)C)C)C)C	✓
OC(=O)[C@@H](Oc1ccc(cc1)Cn1c2ccc(cc2c(c1C)C)C(=O)N[C@H](c1cccc(c1)C(C)C)C)C	✓
OC(=O)[C@H](Oc1ccc(cc1)Cn1c2ccc(cc2c(c1C)C)C(=O)N[C@H](c1cccc(c1)C(C)C)C)C	✓
OC(=O)C(Oc1ccc(cc1)Cn1c2ccc(cc2c(c1C)C)C(=O)N[C@H](c1cccc(c1)C(C)C)C)(C)C	✓
OC(=O)COc1ccc(cc1)Cn1c2ccc(cc2c(c1C)C)C(=O)N[C@H](c1cccc(c1)C(C)C)C	✓
OC(=O)[C@@H](Oc1cccc(c1)Cn1c(C)c(c2c1ccc(c2)C(=O)N[C@H](c1cccc(c1)C(C)C)C)C)C	✓
OC(=O)[C@H](Oc1cccc(c1)Cn1c(C)c(c2c1ccc(c2)C(=O)N[C@H](c1cccc(c1)C(C)C)C)C)C	✓
OC(=O)C(Oc1cccc(c1)Cn1c(C)c(c2c1ccc(c2)C(=O)N[C@H](c1cccc(c1)C(C)C)C)C)(C)C	✓
N#CCOc1cccc(c1)Cn1c(C)c(c2c1ccc(c2)C(=O)N[C@H](c1cccc(c1)C(C)C)C)C	✓
OC(=O)COc1cccc(c1)Cn1c(C)c(c2c1ccc(c2)C(=O)N[C@H](c1cccc(c1)C(C)C)C)C	✓
CC(c1cccc(c1)[C@@H](NC(=O)c1ccc2c(c1)c(C)c(n2Cc1ccc(cc1)c1ccccc1)C)Cc1ccccc1)C	✓
O=C(c1ccc2c(c1)c(C)c(n2Cc1ccc(cc1)c1ccccc1C(=O)O)C)N[C@H](c1cccc(c1)C(C)C)Cc1ccccc1	✓
OC(=N[C@H](C(F)(F)F)c1cccc(c1)C(C)C)c1ccc2c(c1)c(C)c(n2Cc1ccc(cc1)c1ccccc1)C	✓
O=C(c1ccc2c(c1)c(C)c(n2Cc1ccc(cc1)c1ccccc1C(=O)O)C)N[C@H](C(F)(F)F)c1cccc(c1)C(C)C	✓
OC(=O)c1c(Oc2ccc(cc2)C(F)(F)F)c2c(n1c1cccc(c1)C(C)C)cccc2	✓
CC(c1cccc(c1)n1c2ccccc2c(c1C(=O)O)Oc1cccc(c1)C(F)(F)F)C	✓
Oc1cccc(c1)Oc1c(C(=O)O)n(c2c1cccc2)c1cccc(c1)C(C)C	✓
O=C(c1ccc2c(c1)c(C)c(n2Cc1ccc(cc1)c1ccccc1)C)NCc1cccc(c1)C(C)C	✓
O=C(c1ccc2c(c1)c(C)c(n2Cc1ccc(cc1)c1ccccc1C(=O)O)C)NCc1cccc(c1)C(C)C	✓
Clc1ccc2c(c1)n(c1ccc(cc1)C(C)(C)C)c(c2Oc1cccc(c1)C(C)C)C(=O)O	✓
CC(CC(C(=O)O)Cc1ccc(nc1)OCCc1nc(oc1C)c1ccccc1)C						✓	✓
CC(Cc1cc(ccc1OCCCOc1ccc(cc1)[C@@H]1SC(=O)NC1=O)Oc1ccccc1)C	✓	✓
CC(Cc1cc(ccc1OCCCOc1ccc(cc1)C1SC(=O)NC1=O)Oc1ccccc1)C	✓	✓
CC(Cc1ccc(c(c1)Cl)OCCCOc1ccc2c(c1)O[C@@](CC2)(C)C(=O)O)C	✓
CC(CCN(S(=O)(=O)c1ccc(c(c1)C)OCC(=O)O)c1cccc(c1)c1ccc(cc1)C(F)(F)F)C	✓
CC(CCS(=O)(=O)NC(=O)/C=C/c1cc(nn1Cc1ccc(cc1Cl)C(F)(F)F)OC(C)C)C	✓
CC(COC(=O)N1CCC(=C(C1)c1cccc(c1)OCCc1nc(oc1C)c1ccccc1)CC(=O)O)C	✓
CC(COC(=O)N1CCC(=C(C1)Cc1ccc(cc1)OCCc1nc(oc1C)c1ccccc1)C(=O)O)C	✓
CC(COC(=O)N1CCC(=C(C1)Cc1cccc(c1)OCCc1nc(oc1C)c1ccccc1)C(=O)O)C	✓
CC(COC(=O)N1CCC(=C(C1)CCc1ccc(cc1)OCCc1nc(oc1C)c1ccccc1)C(=O)O)C	✓
CC(COC(=O)N1CCC(C(=C1)Cc1cccc(c1)OCCc1nc(oc1C)c1ccccc1)C(=O)O)C	✓
CC(COC(=O)N1CCC(C(C1)c1cccc(c1)OCCc1nc(oc1C)c1ccccc1)C(=O)O)C	✓
CC(COC(=O)N1CCC(C(C1)Cc1ccc(cc1)OCCc1nc(oc1C)c1ccccc1)C(=O)O)C	✓
CC(COC(=O)N1CCC(C(C1)Cc1cccc(c1)OCCc1nc(oc1C)c1ccccc1)C(=O)O)C	✓
CC(COC(=O)N1CCC(C(C1)CCc1ccc(cc1)OCCc1nc(oc1C)c1ccccc1)C(=O)O)C	✓
CC(COC(=O)N1CCc2c(C1)c(CCC(=O)O)ccc2OCCc1nc(oc1C)c1ccccc1)C	✓
CC(COC(C(=O)O)Cc1ccc(c2c1scc2)OCCc1nc(oc1C)c1ccccc1)C	✓
CC(COc1ccc2c(c1)c(Oc1cccc(c1)C(F)(F)F)c(n2c1ccc(cc1)C(C)(C)C)C(=O)O)C	✓
OC(=O)CCc1ccc(cc1)CN(C(=O)c1cccc(c1)CNC(=O)c1ccccc1)C(C)C	✓
CC(O[C@@H](C(=O)O)Cc1ccc2c(c1)ccn2Cc1nc(oc1C)c1ccc(cc1)C(F)(F)F)C	✓
CC(OC(=O)c1ccccc1NC(C(=O)O)Cc1ccc(cc1)OCCc1nc(oc1C)c1ccccc1)C						✓	✓
OC(=O)CCc1ccc(cc1CNC(=O)OC(C)C)OCCc1nc(oc1C)c1ccc(cc1)c1ccccc1	✓
OC(=O)CCc1ccc(cc1CNC(=O)OC(C)C)OCCc1nc(oc1C)c1ccc(cc1)c1ncccn1	✓
CC(OC(=O)NCc1cc(OCCc2nc(oc2C)c2ccc(cc2)Oc2ccccc2)ccc1CCC(=O)O)C	✓
OC(=O)CCc1ccc(cc1CNC(=O)OC(C)C)OCCc1nc(oc1C)c1ccccc1	✓
OC(=O)CCc1ccc(cc1CNC(=O)OC(C)C)OCCc1nc(sc1C)N1CCOCC1	✓
CC(OC(C(=O)O)Cc1ccc2c(c1)ccn2Cc1nc(oc1C)c1ccc(cc1)C(F)(F)F)C	✓
N#Cc1ccccc1c1ccc(cc1)Cn1c(C)c(c2c1ccc(c2)C(=O)N[C@H](c1ccc(cc1)OC(C)C)C)C	✓
CC(Oc1ccc(cc1)[C@@H](NC(=O)c1ccc2c(c1)c(C)c(n2Cc1ccc(cc1)c1ccccc1C(=O)O)C)C)C	✓
CC(Oc1cccc(c1)[C@@H](NC(=O)c1ccc2c(c1)c(C)c(n2Cc1cc(ccc1Cl)O[C@H](C(=O)O)C)C)C)C	✓
CC(Oc1cccc(c1)[C@@H](NC(=O)c1ccc2c(c1)c(C)c(n2Cc1ccc(cc1)c1ccccc1C(=O)O)C)C)C	✓
CC(Oc1cccc(c1)[C@@H](NC(=O)c1ccc2c(c1)c(C)c(n2Cc1ccc(c(c1)O[C@H](C(=O)O)C)Cl)C)C)C	✓
CC(Oc1cccc(c1)[C@@H](NC(=O)c1ccc2c(c1)c(C)c(n2Cc1cccc(c1)O[C@H](C(=O)O)C)C)C)C	✓
CC(Oc1ccccc1[C@@H](NC(=O)c1ccc2c(c1)c(C)c(n2Cc1ccc(cc1)c1ccccc1C(=O)O)C)C)C	✓
O=C(CC(C(=O)O)C)NC[C@@H](Nc1ccccc1C(=O)c1ccccc1)Cc1ccc(cc1)OCCc1nc(oc1C)c1ccccc1	✓					✓	✓
CC(C(=O)NC[C@@H](Nc1ccccc1C(=O)c1ccccc1)Cc1ccc(cc1)OCCc1nc(oc1C)c1ccccc1)CC(C(=O)O)C						✓	✓
OC(=O)C(Cc1ccc(nc1)OCCc1nc(oc1C)c1ccccc1)C						✓	✓
OC(=O)C(Cc1ccc(cc1)OCCN(c1nc2c(o1)cccc2)C)C						✓	✓
Clc1ccc(cc1)OC(C(=O)O)(Cc1ccccc1)C	✓
CC(NC(=O)c1ccc2c(c1)c(C)c(n2Cc1ccc(cc1)c1ccccc1C(=O)O)C)CCc1ccccc1	✓
CC(Cc1ccccc1)COc1ccc(cc1)C[C@@H](C(=O)O)Nc1ccccc1C(=O)c1ccccc1						✓	✓
O=C(c1ccc2c(c1)c(C)c(n2Cc1ccc(cc1)c1ccccc1C(=O)O)C)NC(c1cccc2c1cccc2)C	✓
Brc1cncc(c1)C(NC(=O)c1ccc2c(c1)c(C)c(n2Cc1ccc(cc1)c1ccccc1C(=O)O)C)C	✓
O=C(c1ccc2c(c1)c(C)c(n2Cc1ccc(cc1)c1ccccc1C(=O)O)C)NC(c1cncc(c1)C1CC1)C	✓
Fc1ccc(c(c1)F)Cn1ccc2c1ccc(c2)C(=O)NC(c1cccc2c1cccc2)C	✓
Clc1ccc(cc1)c1cccc(c1C)N(S(=O)(=O)c1ccc(c(c1C)C)OC(C(=O)O)C)CC1CC1	✓
Clc1ccc(cc1)c1cccc(c1C)N(S(=O)(=O)c1ccc(c(c1C)C)OC(C(=O)O)C)CC1CCC1	✓
Clc1ccc(cc1)c1cccc(c1C)N(S(=O)(=O)c1ccc(c(c1C)C)OC(C(=O)O)C)CCCC(F)(F)F	✓
OC(=O)C(Oc1ccc(cc1)OCCc1nc(oc1C)c1ccccc1)C	✓
CC[C@](C(=O)O)(Cc1ccc(cc1)OCCCOc1ccc(cc1Cl)C1CCC(CC1)(C)C)C	✓
CC[C@](C(=O)O)(Cc1ccc(cc1)OCCCOc1ccc(cc1Cl)C1CCCCC1)C	✓
CC[C@](C(=O)O)(Cc1ccc(cc1)OCCCOc1ccccc1Cl)C	✓
CC[C@](C(=O)O)(Oc1cccc(c1)Cn1c2cc(ccc2c(c1C)C(=O)c1ccc(cc1)Cl)OC(F)(F)F)C	✓
CC[C@](C(=O)O)(Oc1ccccc1)Cc1ccc(cc1)OCCc1nc(oc1C)c1ccccc1	✓
CC[C@@]1(CCc2c(O1)cc(cc2)OCCCOc1ccc(cc1Cl)CC(C)C)C(=O)O	✓
CC[C@@]1(CCc2c(O1)cc(cc2)OCCCOc1ccc(cc1Cl)C(C)(C)C)C(=O)O	✓
CC[C@@]1(CCc2c(O1)cc(cc2)OCCCOc1ccc(cc1Cl)C(C)C)C(=O)O	✓
CC[C@@]1(CCc2c(O1)cc(cc2)OCCCOc1ccc(cc1Cl)C(F)(F)F)C(=O)O	✓
CC[C@@]1(CCc2c(O1)cc(cc2)OCCCOc1ccc(cc1Cl)C1CCC(CC1)(C)C)C(=O)O	✓
CC[C@@]1(CCc2c(O1)cc(cc2)OCCCOc1ccc(cc1Cl)C1CCC2(CC1)CC2)C(=O)O	✓
CC[C@@]1(CCc2c(O1)cc(cc2)OCCCOc1ccc(cc1Cl)C1CCCCC1)C(=O)O	✓
CC[C@@]1(CCc2c(O1)cc(cc2)OCCCOc1ccc(cc1Cl)Cl)C(=O)O	✓
CC[C@@]1(CCc2c(O1)cc(cc2)OCCCOc1ccc(cc1Cl)F)C(=O)O	✓
CC[C@@]1(CCc2c(O1)cc(cc2)OCCCOc1ccc(cc1Cl)OC(F)(F)F)C(=O)O	✓
CC[C@@]1(CCc2c(O1)cc(cc2)OCCCOc1ccc(cc1Cl)Oc1ccc(cc1)F)C(=O)O	✓
CC[C@@]1(CCc2c(O1)cc(cc2)OCCCOc1ccc(cc1Cl)OCC(F)(F)F)C(=O)O	✓
CC[C@H](C(=O)O)Cc1ccc(c(c1)C(=O)NCc1ccc(cc1)C(F)(F)F)OC	✓
CC[C@H](c1ccccc1)NC(=O)c1ccc2c(c1)c(C)c(n2Cc1ccc(cc1)c1ccccc1C(=O)O)C	✓
CC[C@H](C(=O)O)Oc1cccc(c1)n1c(C)c(c2c1cc(cc2)OC(F)(F)F)C(=O)c1ccc(cc1)OC	✓
CC[C@H](C(=O)O)Oc1cccc(c1)Cn1c(=O)n(c2c1cc(cc2)C(F)(F)F)c1noc2c1ccc(c2)OC	✓
CC[C@H](C(=O)O)Oc1cccc(c1)Cn1c2cc(ccc2c(c1C)C(=O)c1ccc(cc1)Cl)OC(F)(F)F	✓
CC[C@@](C(=O)O)(Cc1ccc(cc1)OCCCOc1ccc(cc1Cl)C1CCCCC1)C	✓
CC[C@]1(CCc2c(O1)cc(cc2)OCCCOc1ccc(cc1Cl)Oc1ccc(cc1)F)C(=O)O	✓
CC[C@@H](Oc1ccc(cc1C(=O)c1ccccc1)CC)CCOc1ccc(c(c1)C)CCC(=O)O	✓
CC[C@@H](c1cccc(c1)C(C)C)NC(=O)c1ccc2c(c1)c(C)c(n2Cc1ccc(cc1)c1ccccc1C(=O)O)C	✓
CC[C@@H](c1ccccc1)NC(=O)c1ccc2c(c1)c(C)c(n2Cc1ccc(cc1)c1ccccc1C(=O)O)C	✓
CC[C@@H](c1ccccc1)NC(=O)c1ccc2c(c1)c(C)c(n2Cc1ccccc1c1ccc(cc1)C(=O)O)C	✓
CC[C@@H](c1ccccc1)NC(=O)c1ccc2c(c1)c(C)c(n2Cc1ccccc1c1cccc(c1)C(=O)O)C	✓
CC[C@@H](c1ccccc1)NC(=O)c1ccc2c(c1)ccn2Cc1ccccc1c1ccc(cc1)C(=O)O	✓
CC[C@@H](c1ccccc1)NC(=O)c1ccc2c(c1)ccn2Cc1ccccc1c1cccc(c1)C(=O)O	✓
CC[C@@H](C(=O)O)Oc1cccc(c1)Cn1c2cc(ccc2c(c1C)C(=O)c1ccc(cc1)Cl)OC(F)(F)F	✓
CC/C=C\C/C=C\C/C=C\C/C=C\C/C=C\CCCC(=O)O	✓			✓
CC/C=C\C/C=C\C/C=C\CCCCCCCC(=O)O	✓			✓
CC/C=C/C(=O)N(CCOc1ccc(cc1)CC1SC(=O)NC1=O)C						✓	✓	✓
OC(=O)[C@@]1(C)CCc2c(O1)cc(cc2)OCCCOc1ccc(cc1Cl)C1CCC(CC1)(C)C	✓
OC(=O)C1(C)CCc2c(O1)cc(cc2)OCCCOc1ccc(cc1Cl)Oc1ccccc1	✓
OC(=O)[C@@H](Nc1ccccc1C(=O)c1ccccc1)Cc1ccc(cc1)OCC1(C)CCCCC1						✓
O=C1NC(=O)C(S1)Cc1ccc(cc1)OCC1(C)CCCCC1					✓	✓	✓	✓
OC(=O)[C@@H](Nc1ccccc1C(=O)c1ccccc1)Cc1ccc(cc1)OCCc1nc([nH]c1C)c1ccccc1						✓	✓
O=C1NC(=C(C(N1)c1ccc(cc1)OCCCn1ccc2c1nccc2)C(=O)O)C	✓
O=C1NC(=C(C(N1)c1ccc(cc1)OCCCOc1cc(C)nc2c1cccc2)C(=O)O)C	✓
O=C1NC(=C(C(N1)c1ccc(cc1)OCCCOc1cccc2c1c1ccccc1[nH]2)C(=O)O)C	✓
O=C1NC(=C(C(N1)c1ccc(cc1)OCCn1c2ccccc2c2c1cccc2)C(=O)O)C	✓
O=C1NC(=C(C(N1)c1ccc(cc1)OCCn1ccc2c1nccc2)C(=O)O)C	✓
O=C1NC(=C(C(N1)c1ccc(cc1)OCCOc1cc(C)nc2c1cccc2)C(=O)O)C	✓
O=C1NC(=C(C(N1)c1ccc(cc1)OCCOc1ccc(cc1)C(=O)c1ccc(cc1)Cl)C(=O)O)C	✓
O=C1NC(=C(C(N1)c1ccc(cc1)OCCOc1cccc2c1c1ccccc1[nH]2)C(=O)O)C	✓
O=C1NC(=C(C(N1)c1ccc(cc1)OCCOc1cccc2c1nc(C)cc2)C(=O)O)C	✓
O=C(Cn1c(=O)c(C)nc2c1cccc2)Nc1ccc(cc1)S(=O)(=O)NC(=O)NC1CCCCC1	✓
O=C(Cn1c(=O)c(C)nc2c1cccc2)Nc1ccc(cc1)S(=O)(=O)NC(=S)NC1CCCCC1	✓
OC(=O)[C@@H](Nc1ccccc1C(=O)c1ccccc1)Cc1ccc(cc1)OCCn1nc(C)ccc1=O						✓	✓
Clc1ccc(cc1)C(=O)c1c(C)n(c2c1ccc(c2)OC(F)(F)F)Cc1cccc(c1)OC1(CCC1)C(=O)O	✓
OC(=O)COc1cccc(c1)Cn1c2cc(ccc2c(c1C)C(=O)c1ccc(cc1)Cl)OC(F)(F)F	✓
C#CCOc1cc(ccc1Sc1ccc(c(c1C)C)OCC(=O)O)COc1ccc(cc1)C(F)(F)F						✓	✓
N#CCOc1cc(ccc1Sc1ccc(c(c1C)C)OCC(=O)O)COc1ccc(cc1)C(F)(F)F						✓	✓
OC(=O)COc1ccc(c(c1C)C)Sc1ccc(cc1OCc1cccnc1)COc1ccc(cc1)C(F)(F)F						✓	✓
OC(=O)COc1ccc(c(c1C)C)Sc1ccc(cc1OCC1CCCO1)COc1ccc(cc1)C(F)(F)F						✓	✓
OC(=O)COc1ccc(c(c1C)C)Sc1ccc(cc1OCc1ccncc1)COc1ccc(cc1)C(F)(F)F						✓	✓
OC(=O)COc1ccc(c(c1C)C)Sc1ccc(cc1OCCN1CCOCC1)COc1ccc(cc1)C(F)(F)F						✓	✓
OC(=O)[C@@H](Nc1ccccc1C(=O)c1ccccc1)Cc1ccc(cc1)OCC1(C)CCc2c(O1)c(C)c(c(c2C)O)C						✓
O=C1NC(=O)C(S1)Cc1ccc(cc1)OCC1(C)CCc2c(O1)c(C)c(c(c2C)O)C	✓	✓				✓	✓	✓
Brc1ccc(cc1)C(NC(=O)c1ccc2c(c1)c(C)c(n2Cc1ccc(cc1)c1ccccc1)C)(C)C	✓
Clc1ccc(c(c1)C(F)(F)F)CNC(=O)c1ccc2c(c1)c(C)c(n2Cc1ccc(cc1)c1ccccc1)C	✓
Fc1ccc(c(c1)F)CNC(=O)c1ccc2c(c1)c(C)c(n2Cc1ccc(cc1)c1ccccc1)C	✓
OC[C@@H](c1ccccc1)NC(=O)c1ccc2c(c1)c(C)c(n2Cc1ccc(cc1)c1ccccc1C(=O)O)C	✓
O=C(c1ccc2c(c1)c(C)c(n2Cc1ccc(cc1)c1ccccc1C(=O)O)C)N[C@@H]1C[C@H]1c1ccccc1	✓
O=C(c1ccc2c(c1)c(C)c(n2Cc1ccc(cc1)c1ccccc1C(=O)O)C)N[C@@H]1COc2c(C1)cccc2	✓
O=C(N1CC[C@@H](C1)NC(=O)c1ccc2c(c1)c(C)c(n2Cc1ccc(cc1)c1ccccc1C(=O)O)C)OCc1ccccc1	✓
O=C(c1ccc2c(c1)c(C)c(n2Cc1ccc(cc1)c1ccccc1C(=O)O)C)NC(c1ccccc1)(C)C	✓
O=C(c1ccc2c(c1)c(C)c(n2Cc1ccc(cc1)c1ccccc1C(=O)O)C)NC(c1ccccc1)c1ccccc1	✓
O=C(c1ccc2c(c1)c(C)c(n2Cc1ccc(cc1)c1ccccc1C(=O)O)C)NC1CCC1	✓
O=C(c1ccc2c(c1)c(C)c(n2Cc1ccc(cc1)c1ccccc1C(=O)O)C)NC1CCCC1	✓
O=C(c1ccc2c(c1)c(C)c(n2Cc1ccc(cc1)c1ccccc1C(=O)O)C)NC1COc2c(C1)cccc2	✓
O=C(c1ccc2c(c1)c(C)c(n2Cc1ccc(cc1)c1ccccc1C(=O)O)C)NCC(=O)c1ccccc1	✓
Brc1ccc(cc1)CNC(=O)c1ccc2c(c1)c(C)c(n2Cc1ccc(cc1)c1ccccc1C(=O)O)C	✓
[C-]#[N+]c1ccc(cc1)CNC(=O)c1ccc2c(c1)c(C)c(n2Cc1ccc(cc1)c1ccccc1C(=O)O)C	✓
O=C(c1ccc2c(c1)c(C)c(n2Cc1ccc(cc1)c1ccccc1C(=O)O)C)NCc1ccc(cc1)[N+](=O)[O-]	✓
O=C(c1ccc2c(c1)c(C)c(n2Cc1ccc(cc1)c1ccccc1C(=O)O)C)NCc1ccc(cc1)C(C)(C)C	✓
O=C(c1ccc2c(c1)c(C)c(n2Cc1ccc(cc1)c1ccccc1C(=O)O)C)NCc1ccc(cc1)C(F)(F)F	✓
O=C(c1ccc2c(c1)c(C)c(n2Cc1ccc(cc1)c1ccccc1C(=O)O)C)NCc1ccc(cc1)c1ccccc1	✓
O=C(c1ccc2c(c1)c(C)c(n2Cc1ccc(cc1)c1ccccc1C(=O)O)C)NCc1ccc(cc1)S(=O)(=O)C	✓
O=C(c1ccc2c(c1)c(C)c(n2Cc1ccc(cc1)c1ccccc1C(=O)O)C)NCc1ccc(cc1)S(=O)(=O)N	✓
Clc1ccc(cc1)CNC(=O)c1ccc2c(c1)c(C)c(n2Cc1ccc(cc1)c1ccccc1C(=O)O)C	✓
O=C(c1ccc2c(c1)c(C)c(n2Cc1ccc(cc1)c1ccccc1C(=O)O)C)NCc1ccc(c(c1)F)F	✓
Fc1ccc(cc1)CNC(=O)c1ccc2c(c1)c(C)c(n2Cc1ccc(cc1)c1ccccc1C(=O)O)C	✓
Ic1ccc(cc1)CNC(=O)c1ccc2c(c1)c(C)c(n2Cc1ccc(cc1)c1ccccc1C(=O)O)C	✓
Nc1ccc(cc1)CNC(=O)c1ccc2c(c1)c(C)c(n2Cc1ccc(cc1)c1ccccc1C(=O)O)C	✓
O=C(c1ccc2c(c1)c(C)c(n2Cc1ccc(cc1)c1ccccc1C(=O)O)C)NCc1ccc2c(c1)OCO2	✓
O=C(c1ccc2c(c1)c(C)c(n2Cc1ccc(cc1)c1ccccc1C(=O)O)C)NCc1cccc(c1)[N+](=O)[O-]	✓
O=C(c1ccc2c(c1)c(C)c(n2Cc1ccc(cc1)c1ccccc1C(=O)O)C)NCc1cccc(c1)C(F)(F)F	✓
O=C(c1ccc2c(c1)c(C)c(n2Cc1ccc(cc1)c1ccccc1C(=O)O)C)NCc1cccc(c1)S(=O)(=O)C	✓
Clc1cccc(c1)CNC(=O)c1ccc2c(c1)c(C)c(n2Cc1ccc(cc1)c1ccccc1C(=O)O)C	✓
Nc1cccc(c1)CNC(=O)c1ccc2c(c1)c(C)c(n2Cc1ccc(cc1)c1ccccc1C(=O)O)C	✓
O=C(c1ccc2c(c1)c(C)c(n2Cc1ccc(cc1)c1ccccc1C(=O)O)C)NCc1cccc(c1)OC(F)(F)F	✓
O=C(c1ccc2c(c1)c(C)c(n2Cc1ccc(cc1)c1ccccc1C(=O)O)C)NCc1cccc2c1cccc2	✓
O=C(c1ccc2c(c1)c(C)c(n2Cc1ccc(cc1)c1ccccc1C(=O)O)C)NCc1ccccc1	✓
O=C(c1ccc2c(c1)c(C)c(n2Cc1ccc(cc1)c1ccccc1C(=O)O)C)NCc1ccccc1[N+](=O)[O-]	✓
O=C(c1ccc2c(c1)c(C)c(n2Cc1ccc(cc1)c1ccccc1C(=O)O)C)NCc1ccccc1Br	✓
O=C(c1ccc2c(c1)c(C)c(n2Cc1ccc(cc1)c1ccccc1C(=O)O)C)NCc1ccccc1Cl	✓
O=C(c1ccc2c(c1)c(C)c(n2Cc1ccc(cc1)c1ccccc1C(=O)O)C)NCc1ccccc1N	✓
O=C(c1ccc2c(c1)c(C)c(n2Cc1ccc(cc1)c1ccccc1C(=O)O)C)NCc1cccs1	✓
O=C(c1ccc2c(c1)c(C)c(n2Cc1ccc(cc1)c1ccccc1C(=O)O)C)NCC1COc2c(C1)cccc2	✓
O=C(c1ccc2c(c1)c(C)c(n2Cc1ccc(cc1)c1ccccc1C(=O)O)C)NCC1COc2c(O1)cccc2	✓
O=C(c1ccc2c(c1)c(C)c(n2Cc1ccc(cc1)c1ccccc1C(=O)O)C)NCCCc1ccccc1	✓
OC(=O)COc1cccc(c1)Cc1c(C)n(c2c1cc(cc2)OC(F)(F)F)C(=O)c1ccc(cc1)Cl	✓
Clc1ccc(c(c1)C(=O)O)NC(=O)c1cccc(c1)S(=O)(=O)N1CCc2c(C1)c(C)c(cc2)Cl	✓
OC(=O)[C@@H](Nc1ccccc1C(=O)c1ccccc1)Cc1ccc(cc1)OCCc1cc(n(n1)c1ccccc1)C						✓	✓
Cc1cc(CNC(=O)c2ccc(cc2F)C(F)(F)F)cc(c1)Oc1ccc(c(c1)C)OC(C(=O)O)(C)C	✓
OC(=O)[C@@H](Nc1ccccc1C(=O)c1ccccc1)Cc1ccc(cc1)OCCn1nc(cc1C)c1ccccc1						✓	✓
Clc1ccc(c(c1)Cl)S(=O)(=O)Nc1ccc(c(c1)C)Oc1cncc(c1)Cl	✓
Fc1cc(CNC(=O)c2ccc(cc2F)C(F)(F)F)cc(c1)Oc1ccc(c(c1)C)OC(C(=O)O)(C)C	✓
OC(=O)C(Oc1ccc(cc1C)Oc1ccc(c(c1)CNC(=O)c1ccc(cc1F)C(F)(F)F)F)(C)C	✓
OC(=O)CCc1ccc(cc1C)Oc1cccc(c1)CNC(=O)c1[nH]c2c(c1C)cc(cc2)Cl	✓
OC(=O)CCc1ccc(cc1C)Oc1cccc(c1)CNC(=O)c1n(C)c2c(c1C)cc(cc2)Cl	✓
OC(=O)CCc1ccc(cc1C)Oc1cccc(c1)CNC(=O)c1cc2c([nH]1)cccc2Cl	✓
OC(=O)CCc1ccc(cc1C)Oc1cccc(c1)CNC(=O)c1[nH]c2c(c1)cc(cc2)Br	✓
OC(=O)CCc1ccc(cc1C)Oc1cccc(c1)CNC(=O)c1[nH]c2c(c1)cc(c(c2)Cl)Cl	✓
OC(=O)CCc1ccc(cc1C)Oc1cccc(c1)CNC(=O)c1[nH]c2c(c1)cc(cc2)Cl	✓
OC(=O)CCc1ccc(cc1C)Oc1cccc(c1)CNC(=O)c1cc2c(n1C)ccc(c2)Cl	✓
OC(=O)CCc1ccc(cc1C)Oc1cccc(c1)CNC(=O)c1[nH]c2c(c1)ccc(c2)Cl	✓
OC(=O)CCc1ccc(cc1C)Oc1cccc(c1)CNC(=O)c1cc2c([nH]1)c(Br)ccc2	✓
O=C(c1ccc(cc1)C(F)(F)F)NCc1cccc(c1)Oc1ccc(c(c1)C)OC(C(=O)O)(C)C	✓
Cc1cc(ccc1OC(C(=O)O)(C)C)Oc1cccc(c1)CNC(=O)c1ccc(cc1Br)C(F)(F)F	✓
Cc1cc(ccc1OC(C(=O)O)(C)C)Oc1cccc(c1)CNC(=O)c1ccc(cc1C(F)(F)F)C(F)(F)F	✓
OC(=O)CCc1ccc(cc1C)Oc1cccc(c1)CNC(=O)c1ccc(cc1C)C(F)(F)F	✓
Cc1cc(ccc1OC(C(=O)O)(C)C)Oc1cccc(c1)CNC(=O)c1ccc(cc1C)C(F)(F)F	✓
Cc1cc(ccc1OC(C(=O)O)(C)C)Oc1cccc(c1)CNC(=O)c1ccc(cc1Cl)C(F)(F)F	✓
Cc1cc(ccc1OC(C(=O)O)(C)C)Oc1cccc(c1)CNC(=O)c1ccc(cc1F)C(F)(F)F	✓
OC(=O)C(Oc1ccc(cc1C)Oc1cccc(c1)CNC(=O)c1ccc(cc1Oc1ccccc1)C(F)(F)F)(C)C	✓
Clc1ccc(c(c1)C)C(=O)NCc1cccc(c1)Oc1ccc(c(c1)C)OC(C(=O)O)(C)C	✓
Cc1cc(ccc1OC(C(=O)O)(C)C)Oc1cccc(c1)CNC(=O)c1ccc(cc1C)OC(F)(F)F	✓
OC(=O)Cc1csc2c1c(C)cc(c2)OCc1noc(c1)c1ccc(cc1)Cl	✓
OC(=O)C(c1onc(c1)C)Cc1ccc(cc1)CCCc1nc(oc1C)c1ccccc1	✓
OC(=O)COc1cc(Cl)c(cc1C)SCc1ccc(cc1)OCc1ccc(cc1)C(F)(F)F	✓
OC(=O)COc1c(C)cc(c2c1CCC2)SCc1ccc(cc1)OCc1ccc(cc1)C(F)(F)F	✓
OC(=O)COc1c(C)cc(c2c1CCCO2)SCc1ccc(cc1)OCc1ccc(cc1)C(F)(F)F	✓
OC(=O)COc1ccc(cc1C)SCc1sc(nc1C)c1ccc(cc1)C(F)(F)F	✓
OC(=O)Cc1csc2c1cc(C)c(c2)OCc1ccccc1COc1ccc(cc1)C(F)(F)F	✓
OC(=O)Cc1csc2c1cc(C)c(c2)OCc1sc(nc1C)c1ccc(cc1)C(F)(F)F	✓
Cc1ccc(c(c1)C)C(=O)NCc1cccc(c1)Oc1ccc(c(c1)C)OC(C(=O)O)(C)C	✓
Cc1ccc(cc1)c1oc(c(n1)CCOc1ccc(cn1)CC1(CCCO1)C(=O)O)C						✓	✓
Cc1ccc(cc1)S(=O)(=O)NC(=O)c1cc2c(n1Cc1cccc(c1)C(F)(F)F)cccc2	✓
OC(=O)Cn1c(CCCc2ccc(cc2)OC(C(=O)O)(C)C)nn(c1=O)Cc1ccc(cc1)C	✓
OCCn1c(CCCc2ccc(cc2)OC(C(=O)O)(C)C)nn(c1=O)Cc1ccc(cc1)C	✓
Cc1ccc(cc1)Cn1nc(nc1O)CCCc1ccc(cc1)OC(C(=O)O)(C)C	✓
OC(=O)C(Oc1ccc(cc1C)Oc1cc(CNC(=O)c2ccc(cc2F)C(F)(F)F)ccc1C)(C)C	✓
Cc1ccc(cc1)CNC(=O)c1ccc2c(c1)c(C)c(n2Cc1ccc(cc1)c1ccccc1C(=O)O)C	✓
OC(=O)CCN1C(=S)S/C(=C/c2ccccc2OCc2ccc(cc2)C)/C1=O	✓	✓
Cc1ccc(c(c1)C(=O)O)NC(=O)c1ccc(cc1Cl)Cl						✓	✓
Cc1ccc(c(c1)C(=O)O)NC(=O)c1cccc(c1)S(=O)(=O)n1ccc2c1cccc2Br	✓
Cc1ccc(c(c1)C(=O)O)NC(=O)c1cccc(c1)S(=O)(=O)n1ccc2c1cccc2C	✓
Cc1ccc(c(c1)C(=O)O)NC(=O)c1cccc(c1)S(=O)(=O)n1ccc2c1ccc(c2)C	✓
Cc1ccc(c(c1)C(=O)O)NC(=O)c1cccc(c1)S(=O)(=O)n1ccc2c1ccc(c2)Cl	✓
Cc1ccc(c(c1)C(=O)O)NC(=O)c1cccc(c1)S(=O)(=O)n1ccc2c1cc(C)cc2	✓
Cc1ccc(c(c1)C(=O)O)NC(=O)c1cccc(c1)S(=O)(=O)n1ccc2c1cc(Cl)cc2	✓
Cc1ccc(c(c1)C(=O)O)NC(=O)c1cccc(c1)S(=O)(=O)n1ccc2c1c(C)ccc2	✓
Cc1ccc(c(c1)C(=O)O)NC(=O)c1cccc(c1)S(=O)(=O)n1ccc2c1c(Cl)ccc2	✓
Cc1ccc(c(c1)C(=O)O)NC(=O)c1cccc(c1)S(=O)(=O)N1CCc2c(C1)cccc2	✓
OC(=O)CN(C(=O)Oc1ccc(cc1)C)Cc1ccc(cc1)OCc1nc(oc1C)c1ccc(cc1)Cl	✓
OC(=O)CN(C(=O)Oc1ccc(cc1)C)Cc1ccc(cc1)OCCc1nc(oc1C)c1ccc(cc1)Cl	✓
Cc1ccc(cc1)OC(=O)N(Cc1cccc(c1)OCc1nc(oc1C)c1ccc(cc1)C)CC(=O)O	✓
N#Cc1ccc(cc1)c1oc(c(n1)COc1cccc(c1)CN(C(=O)Oc1ccc(cc1)C)CC(=O)O)C	✓
OC(=O)CN(C(=O)Oc1ccc(cc1)C)Cc1cccc(c1)OCc1nc(oc1C)c1ccc(cc1)C(C)(C)C	✓
OC(=O)CN(C(=O)Oc1ccc(cc1)C)Cc1cccc(c1)OCc1nc(oc1C)c1ccc(cc1)C(F)(F)F	✓
OC(=O)CN(C(=O)Oc1ccc(cc1)C)Cc1cccc(c1)OCc1nc(oc1C)c1ccc(cc1)c1ccccc1	✓
OC(=O)CN(C(=O)Oc1ccc(cc1)C)Cc1cccc(c1)OCc1nc(oc1C)c1ccc(cc1)N1CCOCC1	✓
OC(=O)CN(C(=O)Oc1ccc(cc1)C)Cc1cccc(c1)OCc1nc(oc1C)c1ccc(cc1)Cl	✓
OC(=O)CN(C(=O)Oc1ccc(cc1)C)Cc1cccc(c1)OCc1nc(oc1C)c1ccc(cc1)F	✓
OC(=O)CN(C(=O)Oc1ccc(cc1)C)Cc1cccc(c1)OCc1nc(oc1C)c1cccc(c1)Cl	✓
OC(=O)CN(C(=O)Oc1ccc(cc1)C)Cc1cccc(c1)OCc1nc(oc1C)c1ccccc1Cl	✓
OC(=O)CN(C(=O)Oc1ccc(cc1)C)Cc1cccc(c1)OCc1nc(sc1C)c1ccc(cc1)Cl	✓
OC(=O)CN(C(=O)Oc1ccc(cc1)C)Cc1cccc(c1)OCc1oc(nc1C)c1ccc(cc1)Cl	✓
OC(=O)CN(C(=O)Oc1ccc(cc1)C)Cc1cccc(c1)OCc1sc(nc1C)c1ccc(cc1)Cl	✓
OC(=O)CN(C(=O)Oc1ccc(cc1)C)Cc1cccc(c1)OCCc1nc(oc1C)c1ccc(cc1)Cl	✓
OC(=O)C(Oc1ccc(cc1C)Oc1ccc(c(c1)CNC(=O)c1ccc(cc1F)C(F)(F)F)C)(C)C	✓
OC(=O)CCc1ccc(cc1)OCCCOc1ccc(cc1Cl)C	✓
OC(=O)[C@@H](Nc1ccccc1C(=O)c1ccccc1)Cc1ccc(cc1)OCCOc1ccc(cc1)C						✓	✓
Cc1ccc(cc1)OS(=O)(=O)/C=C/c1ccccc1	✓
Cc1ccc(s1)c1nc(c(o1)C)CCOc1ccc(cc1)C[C@@H](C(=O)O)Nc1ccccc1C(=O)c1ccccc1						✓	✓
Cc1cccc(c1)c1oc(c(n1)CCOc1ccc(cn1)CC1(CCCO1)C(=O)O)C						✓	✓
Cc1cccc(c1)c1oc(c(n1)CCOc1ccc(nc1)CC1(CCCO1)C(=O)O)C						✓	✓
Cc1cccc(n1)CCCOc1ccc(cc1)C[C@@H](C(=O)O)Nc1ccccc1C(=O)c1ccccc1						✓	✓
Cc1cccc(n1)CCCOCCOc1ccc(cc1)C[C@@H](C(=O)O)Nc1ccccc1C(=O)c1ccccc1						✓	✓
Cc1cccc(c1)CNC(=O)c1ccc2c(c1)c(C)c(n2Cc1ccc(cc1)c1ccccc1C(=O)O)C	✓
Cc1cccc(c1)COc1ccc(cc1)C[C@@H](C(=O)O)Nc1ccccc1C(=O)c1ccccc1						✓	✓
Clc1nc(nc(c1)Nc1cccc(c1C)C)SC(c1cccc2c1cccc2)C(=O)O	✓		✓
OC(=O)CSc1nc(cc(n1)Cl)Nc1cccc(c1C)C	✓
Cc1cccc(c1)OS(=O)(=O)/C=C/c1ccccc1	✓
OC(=O)C(Oc1ccc(cc1C)Oc1cccc(c1)CNC(=O)c1ccccc1C)(C)C	✓
OC(=O)[C@@H](Nc1ccccc1C(=O)c1ccccc1)Cc1ccc(cc1)OCCc1ccccc1C						✓	✓
O=C(c1ccc2c(c1)c(C)c(n2Cc1ccc(cc1)c1ccccc1C(=O)O)C)NCc1ccccc1C	✓
OC(=O)[C@@H](Nc1ccccc1C(=O)c1ccccc1)Cc1ccc(cc1)OCc1ccccc1C						✓	✓
O=C(c1cc2c(n1Cc1cccc(c1)C(F)(F)F)cccc2)NS(=O)(=O)c1ccccc1C	✓
OC(=O)[C@H]1CN(C[C@H]1Cc1ccc(cc1)OCCc1nc(oc1C)c1ccccc1)c1nccc(n1)C	✓
Clc1ccc(c(c1)Cl)S(=O)(=O)Nc1cc(Cl)c(c(c1)Cl)Oc1cncc(c1)C	✓
OC(=O)[C@@H](Nc1ccccc1C(=O)c1ccccc1)Cc1ccc(cc1)OCCn1nc(nc1C)c1ccccc1						✓	✓
OC(=O)[C@@H](Nc1ccccc1C(=O)c1ccccc1)Cc1ccc(cc1)OCCc1scnc1C						✓	✓
Cc1ccc(o1)CNC(=O)c1ccc2c(c1)c(C)c(n2Cc1ccc(cc1)c1ccccc1C(=O)O)C	✓
OC(=O)[C@@H](n1cccc1)Cc1ccc(cc1)/C=C/Cc1nc(oc1C)c1ccccc1	✓
OC(=O)[C@H](n1cccc1)Cc1ccc(cc1)/C=C/Cc1nc(oc1C)c1ccccc1	✓
OC(=O)[C@@H](n1cccc1)Cc1ccc(cc1)C#CCc1nc(oc1C)c1ccccc1	✓
OC(=O)C(c1ccc(cc1)c1ccccc1)Cc1ccc(cc1)C#CCc1nc(oc1C)c1ccccc1	✓		✓
OC(=O)C(c1cccc(c1)c1ccccc1)Cc1ccc(cc1)C#CCc1nc(oc1C)c1ccccc1	✓		✓
Cc1oc(nc1CC#Cc1ccc(cc1)CC(c1cccnc1)C(=O)O)c1ccccc1	✓
OC(=O)[C@@H](n1cccc1)Cc1ccc(cc1)CCCc1nc(oc1C)c1ccccc1	✓
OC(=O)[C@@H](n1cccn1)Cc1ccc(cc1)CCCc1nc(oc1C)c1ccccc1	✓
OC(=O)[C@@H](n1nccn1)Cc1ccc(cc1)CCCc1nc(oc1C)c1ccccc1	✓
OC(=O)[C@H](n1cccc1)Cc1ccc(cc1)CCCc1nc(oc1C)c1ccccc1	✓
OC(=O)[C@H](n1cccn1)Cc1ccc(cc1)CCCc1nc(oc1C)c1ccccc1	✓
OC(=O)[C@H](n1nncc1)Cc1ccc(cc1)CCCc1nc(oc1C)c1ccccc1	✓
OC(=O)[C@H](n1cncn1)Cc1ccc(cc1)CCCc1nc(oc1C)c1ccccc1	✓
OC(=O)C(c1ccc(cc1)c1ccccc1)Cc1ccc(cc1)CCCc1nc(oc1C)c1ccccc1	✓		✓
OC(=O)C(c1cccc(c1)c1ccccc1)Cc1ccc(cc1)CCCc1nc(oc1C)c1ccccc1	✓		✓
Cc1oc(nc1CCCc1ccc(cc1)CC(c1ccccc1)C(=O)O)c1ccccc1	✓		✓
Cc1oc(nc1CCCc1ccc(cc1)CC(c1cccnc1)C(=O)O)c1ccccc1	✓
OC(=O)C(c1cscc1)Cc1ccc(cc1)CCCc1nc(oc1C)c1ccccc1	✓
OC(=O)C(n1cccn1)Cc1ccc(cc1)CCCc1nc(oc1C)c1ccccc1	✓
OC(=O)C(n1nccn1)Cc1ccc(cc1)CCCc1nc(oc1C)c1ccccc1	✓
OC(=O)C1(CCCO1)Cc1ccc(nc1)OCCCc1nc(oc1C)c1ccccc1						✓	✓
OC(=O)[C@@H](n1cccc1)Cc1ccc(cc1)NCCc1nc(oc1C)c1ccccc1	✓
Cc1oc(nc1CCOc1ccc(cc1)C[C@](C(=O)O)(Oc1ccccc1)C)c1ccccc1	✓
OC(=O)[C@](Oc1ccccc1)(Cc1ccc(cc1)OCCc1nc(oc1C)c1cccs1)C	✓
OC(=O)[C@]1(CCCO1)Cc1ccc(nc1)OCCc1nc(oc1C)c1ccccc1						✓	✓
OC(=O)[C@]1(CCCO1)Cc1ccc(cn1)OCCc1nc(oc1C)c1ccccc1						✓	✓
OC(=O)[C@@H](n1c(C)ccc1C)Cc1ccc(cc1)OCCc1nc(oc1C)c1ccccc1						✓	✓
OC(=O)[C@@H](n1cccc1)Cc1ccc(cc1)OCCc1nc(oc1C)c1ccccc1	✓					✓	✓
O=C(C1CC1)NC[C@@H](Nc1ccccc1C(=O)c1ccccc1)Cc1ccc(cc1)OCCc1nc(oc1C)c1ccccc1	✓					✓	✓
NCC1CCC(CC1)C(=O)NC[C@@H](Nc1ccccc1C(=O)c1ccccc1)Cc1ccc(cc1)OCCc1nc(oc1C)c1ccccc1						✓	✓
OCc1ccc(cc1)C(=O)NC[C@@H](Nc1ccccc1C(=O)c1ccccc1)Cc1ccc(cc1)OCCc1nc(oc1C)c1ccccc1						✓	✓
OC1CCC(CC1)C(=O)NC[C@@H](Nc1ccccc1C(=O)c1ccccc1)Cc1ccc(cc1)OCCc1nc(oc1C)c1ccccc1						✓	✓
O=C(c1ccccc1N[C@@H](Cc1ccc(cc1)OCCc1nc(oc1C)c1ccccc1)CNC(=O)c1ccccc1C(=O)O)c1ccccc1						✓	✓
O=C(C1CCCNC1)NC[C@@H](Nc1ccccc1C(=O)c1ccccc1)Cc1ccc(cc1)OCCc1nc(oc1C)c1ccccc1						✓	✓
O=C(NC[C@@H](Nc1ccccc1C(=O)c1ccccc1)Cc1ccc(cc1)OCCc1nc(oc1C)c1ccccc1)CCC(=O)O						✓	✓
O=C(CCc1ccc(cc1)SC(C(=O)O)(C)C)NC[C@@H](Nc1ccccc1C(=O)c1ccccc1)Cc1ccc(cc1)OCCc1nc(oc1C)c1ccccc1	✓					✓	✓
O=C(CNC(=O)c1ccc(cc1)O)NC[C@@H](Nc1ccccc1C(=O)c1ccccc1)Cc1ccc(cc1)OCCc1nc(oc1C)c1ccccc1						✓	✓
OCc1cccc(c1)C(=O)NCC(=O)NC[C@@H](Nc1ccccc1C(=O)c1ccccc1)Cc1ccc(cc1)OCCc1nc(oc1C)c1ccccc1						✓	✓
OCC(=O)NC[C@@H](Nc1ccccc1C(=O)c1ccccc1)Cc1ccc(cc1)OCCc1nc(oc1C)c1ccccc1						✓	✓
O=C(COc1cccc(c1)N)NC[C@@H](Nc1ccccc1C(=O)c1ccccc1)Cc1ccc(cc1)OCCc1nc(oc1C)c1ccccc1	✓					✓	✓
O=C(c1ccccc1N[C@@H](Cc1ccc(cc1)OCCc1nc(oc1C)c1ccccc1)CNc1ccccn1)c1ccccc1						✓	✓
OC(=O)[C@H](Nc1ccccc1C(=O)C1CCCCC1)Cc1ccc(cc1)OCCc1nc(oc1C)c1ccccc1						✓	✓
OC(=O)[C@H]1[C@@H](Cc2ccc(cc2)OCCc2nc(oc2C)c2ccccc2)C(=O)N1c1ccc(cc1)C(C)(C)C	✓
OC(=O)[C@H]1CN(C[C@H]1Cc1ccc(cc1)OCCc1nc(oc1C)c1ccccc1)C(=O)Oc1ccccc1	✓
OC(=O)[C@H]1CN(C[C@H]1Cc1ccc(cc1)OCCc1nc(oc1C)c1ccccc1)c1nccc(n1)C(F)(F)F	✓
OC(=O)[C@H]1CN(C[C@H]1Cc1ccc(cc1)OCCc1nc(oc1C)c1ccccc1)c1ncccn1	✓
OC(=O)[C@H]1CN(C[C@H]1Cc1ccc(cc1)OCCc1nc(oc1C)c1ccccc1)c1nc2c(o1)cccc2	✓
OC(=O)[C@H]1CN(C[C@H]1Cc1ccc(cc1)OCCc1nc(oc1C)c1ccccc1)c1occ(n1)C(F)(F)F	✓
OC(=O)[C@@H]1CN(C[C@H]1Cc1ccc(cc1)OCCc1nc(oc1C)c1ccccc1)c1nccc(n1)C(F)(F)F	✓
OC(=O)[C@@](Oc1ccccc1)(Cc1ccc(cc1)OCCc1nc(oc1C)C1CCCCC1)C	✓
OC(=O)[C@@](Oc1ccccc1)(Cc1ccc(cc1)OCCc1nc(oc1C)c1cccs1)C	✓
OC(=O)[C@@]1(CCCO1)Cc1ccc(cn1)OCCc1nc(oc1C)c1ccccc1						✓	✓
OC(=O)[C@@H](N1CCCC1)Cc1ccc(cc1)OCCc1nc(oc1C)c1ccccc1	✓					✓	✓
OC(=O)[C@@H](N1CCCCC1)Cc1ccc(cc1)OCCc1nc(oc1C)c1ccccc1						✓	✓
OC(=O)[C@@H](N1CCOCC1)Cc1ccc(cc1)OCCc1nc(oc1C)c1ccccc1						✓	✓
OC(=O)[C@@H](Nc1ccccc1C(=O)c1ccccc1)Cc1ccc(cc1)OCCc1nc(oc1C)c1ccc(cc1)F						✓	✓
OC(=O)[C@@H](Nc1ccccc1C(=O)c1ccccc1)Cc1ccc(cc1)OCCc1nc(oc1C)c1ccccc1	✓					✓	✓
OC(=O)[C@@H](Nc1ccccc1C(=O)c1ccccc1)Cc1ccc(cc1)OCCc1nc(oc1C)c1ccncc1						✓	✓
OC(=O)[C@@H](Nc1ccccc1C(=O)c1ccccc1)Cc1ccc(cc1)OCCc1nc(oc1C)c1sccc1C						✓	✓
OC(=O)[C@@H](Nc1ccccc1C(=O)c1ccccc1)Cc1ccc(cc1)OCCc1nc(oc1C)N1CCCCC1						✓	✓
OC(=O)[C@@H](Nc1ncccn1)Cc1ccc(cc1)OCCc1nc(oc1C)c1ccccc1						✓	✓
OC(=O)[C@@H](NS(=O)(=O)C)Cc1ccc(cc1)OCCc1nc(oc1C)c1ccccc1						✓	✓
OC(=O)[C@@H](Oc1ccccc1)Cc1ccc(cc1)OCCc1nc(oc1C)c1ccccc1	✓
OC(=O)[C@H](Cc1ccc(c2c1cccc2)OCCc1nc(oc1C)c1ccc(cc1)c1ccccc1)OCC(F)(F)F	✓
OC(=O)[C@H](Cc1ccc(c2c1scc2)OCCc1nc(oc1C)c1ccccc1)OCC(F)(F)F	✓
OC(=O)[C@H](Cc1ccc(c2c1scc2)OCCc1nc(oc1C)c1ccccc1)OCC1CC1	✓
OC(=O)[C@@H]1[C@H](Cc2ccc(cc2)OCCc2nc(oc2C)c2ccccc2)C(=O)N1c1ccc(cc1)C(C)(C)C	✓
OC(=O)[C@H]1CN(C[C@@H]1Cc1ccc(cc1)OCCc1nc(oc1C)c1ccccc1)c1nccc(n1)C(F)(F)F	✓
OC(=O)[C@@H]1CN(C[C@@H]1Cc1ccc(cc1)OCCc1nc(oc1C)c1ccccc1)c1nccc(n1)C(F)(F)F	✓
OC(=O)C(C(C)(C)C)Cc1ccc(nc1)OCCc1nc(oc1C)c1ccccc1						✓	✓
OC(=O)C(Cc1ccc(nc1)OCCc1nc(oc1C)c1ccccc1)(C)C						✓	✓
Cc1oc(nc1CCOc1ccc(cc1)CC(C(=O)O)(Oc1ccccc1)C)c1ccc(cc1)c1ccccc1	✓
Cc1oc(nc1CCOc1ccc(cc1)CC(C(=O)O)(Oc1ccccc1)C)c1cccc(c1)c1ccccc1	✓
Cc1oc(nc1CCOc1ccc(cc1)CC(C(=O)O)(Oc1ccccc1)C)c1ccccc1	✓
OC(=O)C(Oc1ccccc1)(Cc1ccc(cc1)OCCc1nc(oc1C)c1cccs1)C	✓					✓	✓
OC(=O)C(Nc1ccccc1C(=O)c1ccc(cc1)C(=O)O)Cc1ccc(cc1)OCCc1nc(oc1C)c1ccccc1						✓	✓
OCc1ccc(cc1)C(=O)c1ccccc1NC(C(=O)O)Cc1ccc(cc1)OCCc1nc(oc1C)c1ccccc1						✓	✓
OC(=O)C(Nc1ccccc1C(=O)c1cccc(c1)C(=O)O)Cc1ccc(cc1)OCCc1nc(oc1C)c1ccccc1						✓	✓
OCc1cccc(c1)C(=O)c1ccccc1NC(C(=O)O)Cc1ccc(cc1)OCCc1nc(oc1C)c1ccccc1						✓	✓
Nc1cccc(c1)C(=O)c1ccccc1NC(C(=O)O)Cc1ccc(cc1)OCCc1nc(oc1C)c1ccccc1						✓	✓
OC(=O)C(Nc1ccccc1C(=O)c1cccnc1)Cc1ccc(cc1)OCCc1nc(oc1C)c1ccccc1						✓	✓
OC(=O)C(Nc1ccccc1C(=O)c1ccncc1)Cc1ccc(cc1)OCCc1nc(oc1C)c1ccccc1						✓	✓
OC(=O)C(Oc1ccccc1)Cc1ccc(cc1)OCCc1nc(oc1C)c1ccccc1	✓
OC(=O)[C@H]1CN(C[C@H]1CCc1ccc(cc1)OCCc1nc(oc1C)c1ccccc1)C(=O)Oc1ccccc1	✓
OC(=O)[C@H]1CN(C[C@@H]1CCc1ccc(cc1)OCCc1nc(oc1C)c1ccccc1)C(=O)Oc1ccccc1	✓
OC(=O)[C@H]1CN(C[C@H]1c1ccc(cc1)OCCc1nc(oc1C)c1ccccc1)C(=O)Oc1ccccc1	✓
OC(=O)C[C@H]1CN(C[C@H]1c1ccc(cc1)OCCc1nc(oc1C)c1ccccc1)C(=O)Oc1ccccc1	✓
OC(=O)[C@H]1CN(C[C@@H]1c1ccc(cc1)OCCc1nc(oc1C)c1ccccc1)C(=O)Oc1ccccc1	✓
OC(=O)c1nn(nc1c1ccc(cc1)OCCc1nc(oc1C)c1ccccc1)c1ccccc1	✓
OC(=O)Cc1nn(nc1c1ccc(cc1)OCCc1nc(oc1C)c1ccccc1)c1ccccc1	✓
OC(=O)C1(CC1)Cc1ccc(nc1)OCCc1nc(oc1C)c1ccccc1						✓	✓
OC(=O)C1(CCC1)Cc1ccc(nc1)OCCc1nc(oc1C)c1ccccc1						✓	✓
OC(=O)C1(CCCCC1)Cc1ccc(nc1)OCCc1nc(oc1C)c1ccccc1						✓	✓
OC(=O)C1(CCCCO1)Cc1ccc(nc1)OCCc1nc(oc1C)c1ccccc1						✓	✓
OC(=O)C1(CCCCO1)Cc1ccc(cn1)OCCc1nc(oc1C)c1ccccc1						✓	✓
N#Cc1ccc(cc1)c1oc(c(n1)CCOc1ccc(cn1)CC1(CCCO1)C(=O)O)C						✓	✓
OC(=O)C1(CCCO1)Cc1ccc(nc1)OCCc1nc(oc1C)c1ccc(cc1)C(F)(F)F						✓	✓
Clc1ccc(cc1)c1oc(c(n1)CCOc1ccc(cn1)CC1(CCCO1)C(=O)O)C						✓	✓
OC(=O)C1(CCCO1)Cc1ccc(nc1)OCCc1nc(oc1C)c1cccc(c1)C(F)(F)F						✓	✓
Clc1cccc(c1)c1oc(c(n1)CCOc1ccc(cn1)CC1(CCCO1)C(=O)O)C						✓	✓
OC(=O)C1(CCCO1)Cc1ccc(nc1)OCCc1nc(oc1C)c1ccccc1						✓	✓
Clc1ccc(cc1)c1oc(c(n1)CCOc1ccc(nc1)CC1(CCCO1)C(=O)O)C						✓	✓
OC(=O)C1(CCCO1)Cc1ccc(cn1)OCCc1nc(oc1C)c1ccccc1						✓	✓
OC(=O)C1(COCC1)Cc1ccc(nc1)OCCc1nc(oc1C)c1ccccc1						✓	✓
Cc1oc(nc1CCOc1ccc(cc1)Cc1c(cnn1c1ccccc1)C(=O)O)c1ccccc1	✓
Cc1oc(nc1CCOc1ccc(cc1)Cc1c(nnn1c1ccccc1)C(=O)O)c1ccccc1	✓
Cn1cc(c(c1)Cc1ccc(cc1)OCCc1nc(oc1C)c1ccccc1)C(=O)O	✓
OC(=O)c1cn(cc1Cc1ccc(cc1)OCCc1nc(oc1C)c1ccccc1)c1ccccc1	✓
OC(=O)c1cn(nc1Cc1ccc(cc1)OCCc1nc(oc1C)c1ccccc1)c1ccccc1	✓
OC(=O)c1nn(nc1Cc1ccc(cc1)OCCc1nc(oc1C)c1ccccc1)c1ccccc1	✓
OC(=O)Cc1nn(nc1Cc1ccc(cc1)OCCc1nc(oc1C)c1ccccc1)c1ccccc1	✓
Cc1oc(nc1CCOc1ccc(cc1)Cc1nnn(c1C(=O)O)c1ccccc1)c1ccccc1	✓
O=C1NC(=O)C(S1)Cc1ccc(cc1)OCCc1nc(oc1C)c1ccccc1	✓	✓				✓	✓	✓
O=C(NCc1cc(OCCc2nc(oc2C)c2ccccc2)ccc1CCC(=O)O)CCc1ccccc1	✓
O=C(NCc1cc(OCCc2nc(oc2C)c2ccccc2)ccc1CCC(=O)O)NCc1ccccc1	✓
OC(=O)CCc1ccc(cc1CNC(=O)Oc1cnccn1)OCCc1nc(oc1C)c1ccc(cc1)c1ccccc1	✓
OC(=O)CCc1ccc(cc1CNC(=O)Oc1cnccn1)OCCc1nc(oc1C)c1ccccc1	✓
O=C(NCc1cc(OCCc2nc(oc2C)c2ccccc2)ccc1CCC(=O)O)OCc1ccccc1	✓
OC(=O)CCc1ccc(cc1CNS(=O)(=O)Cc1ccccc1)OCCc1nc(oc1C)c1ccccc1	✓
C#CCOC(=O)N1CCc2c(C1)c(CCC(=O)O)ccc2OCCc1nc(oc1C)c1ccccc1	✓
OC(=O)CCc1ccc(c2c1CN(CC2)C(=O)OCC(C)(C)C)OCCc1nc(oc1C)c1ccc(cc1)c1ccccc1	✓
OC(=O)CN(Cc1ccc(cc1)Oc1ccccc1)Cc1ccc(cc1)OCCc1nc(oc1C)c1ccccc1	✓
OC(=O)CN(Cc1ccc(cc1)OCc1ccccc1)Cc1ccc(cc1)OCCc1nc(oc1C)c1ccccc1	✓
OC(=O)CN(Cc1ccc2c(c1)cccc2)Cc1ccc(cc1)OCCc1nc(oc1C)c1ccccc1	✓
OC(=O)CN(Cc1ccc2c(c1)OCO2)Cc1ccc(cc1)OCCc1nc(oc1C)c1ccccc1	✓
OC(=O)CN(Cc1cccc(c1)Oc1ccccc1)Cc1ccc(cc1)OCCc1nc(oc1C)c1ccccc1	✓
OC(=O)CN(Cc1cccc2c1cccc2)Cc1ccc(cc1)OCCc1nc(oc1C)c1ccccc1	✓
OC(=O)CN(Cc1ccccc1)Cc1ccc(cc1)OCCc1nc(oc1C)c1ccccc1	✓
OC(=O)CN(Cc1ccccn1)Cc1ccc(cc1)OCCc1nc(oc1C)c1ccccc1	✓
OC(=O)CN(Cc1ccc(o1)c1ccccc1Cl)Cc1ccc(cc1)OCCc1nc(oc1C)c1ccccc1	✓
OC(=O)CN(Cc1ccc(cc1)OCCc1nc(oc1C)c1ccccc1)CCOCc1ccccc1	✓
Brc1ccc(cc1)c1oc(c(n1)CCOc1ccc(cc1)OC(C(=O)O)(C)C)C	✓
Cc1oc(nc1CCOc1ccc(cc1)OC(C(=O)O)(C)C)c1ccc(cc1)c1ccccc1	✓					✓	✓
OC(=O)C(Oc1ccc(cc1)OCCc1nc(oc1C)c1ccccc1)(C)C	✓
Cc1oc(nc1CCOc1ccc(cc1)OC(C(=O)O)(Cc1ccccc1)C)c1ccccc1	✓
OC(=O)COc1ccc(cc1)OCCc1nc(oc1C)c1ccccc1	✓
OC(=O)[C@H]1[C@@H](Cc2cccc(c2)OCCc2nc(oc2C)c2ccccc2)C(=O)N1c1ccc(cc1)C(C)(C)C	✓
OC(=O)[C@H]1CN(C[C@H]1Cc1cccc(c1)OCCc1nc(oc1C)c1ccccc1)C(=O)Oc1ccccc1	✓
OC(=O)[C@H]1CN(C[C@H]1Cc1cccc(c1)OCCc1nc(oc1C)c1ccccc1)c1ccccc1	✓
OC(=O)[C@H]1CN(C[C@H]1Cc1cccc(c1)OCCc1nc(oc1C)c1ccccc1)c1nccc(n1)C(F)(F)F	✓
OC(=O)[C@@H]1[C@H](Cc2cccc(c2)OCCc2nc(oc2C)c2ccc(cc2)Cl)C(=O)N1c1ccc(cc1)C(C)(C)C	✓
Clc1cccc(c1)c1nc(c(o1)C)CCOc1cccc(c1)C[C@@H]1C(=O)N([C@@H]1C(=O)O)c1ccc(cc1)C(C)(C)C	✓
OC(=O)[C@@H]1[C@H](Cc2cccc(c2)OCCc2nc(oc2C)c2ccccc2)C(=O)N1c1ccc(cc1)C(C)(C)C	✓
OC(=O)[C@H]1CN(C[C@@H]1Cc1cccc(c1)OCCc1nc(oc1C)c1ccccc1)C(=O)Oc1ccccc1	✓
OC(=O)C[C@H]1CN(C[C@@H]1Cc1cccc(c1)OCCc1nc(oc1C)c1ccccc1)C(=O)Oc1ccccc1	✓
OC(=O)[C@@H]1CN(C[C@@H]1Cc1cccc(c1)OCCc1nc(oc1C)c1ccccc1)C(=O)Oc1ccccc1	✓
OC(=O)[C@@H]1CN(C[C@@H]1Cc1cccc(c1)OCCc1nc(oc1C)c1ccccc1)c1ccccc1	✓
OC(=O)[C@@H]1CN(C[C@@H]1Cc1cccc(c1)OCCc1nc(oc1C)c1ccccc1)c1nccc(n1)C(F)(F)F	✓
OC(=O)C[C@H]1CN(C[C@H]1c1cccc(c1)OCCc1nc(oc1C)c1ccccc1)C(=O)Oc1ccccc1	✓
OC(=O)C[C@H]1CN(C[C@@H]1c1cccc(c1)OCCc1nc(oc1C)c1ccccc1)C(=O)Oc1ccccc1	✓
OC(=O)CC1=C(CN(CC1)C(=O)Oc1ccccc1)c1cccc(c1)OCCc1nc(oc1C)c1ccccc1	✓
OC(=O)CC1CCN(CC1c1cccc(c1)OCCc1nc(oc1C)c1ccccc1)C(=O)Oc1ccccc1	✓
OC(=O)c1nn(nc1c1cccc(c1)OCCc1nc(oc1C)c1ccccc1)c1ccccc1	✓
OC(=O)Cc1nn(nc1c1cccc(c1)OCCc1nc(oc1C)c1ccccc1)c1ccccc1	✓
OC(=O)[C@H]1CN(C[C@H]1CCc1cccc(c1)OCCc1nc(oc1C)c1ccccc1)C(=O)Oc1ccccc1	✓
OC(=O)[C@H]1CN(C[C@@H]1CCc1cccc(c1)OCCc1nc(oc1C)c1ccccc1)C(=O)Oc1ccccc1	✓
OC(=O)C1=C(Cc2cccc(c2)OCCc2nc(oc2C)c2ccccc2)CN(CC1)c1nccc(n1)C(F)(F)F	✓
O=C(N1CCC(C(=C1)Cc1cccc(c1)OCCc1nc(oc1C)c1ccccc1)C(=O)O)OCc1ccccc1	✓
OC(=O)C1CCN(C=C1Cc1cccc(c1)OCCc1nc(oc1C)c1ccccc1)c1nccc(n1)C(F)(F)F	✓
Cc1oc(nc1CCOc1cccc(c1)Cc1c(cnn1c1ccccc1)C(=O)O)c1ccccc1	✓
OC(=O)C1C(Cc2cccc(c2)OCCc2nc(oc2C)c2ccccc2)C(=O)N1c1ccc(cc1)Cl	✓
OC(=O)C1C(Cc2cccc(c2)OCCc2nc(oc2C)c2ccccc2)C(=O)N1c1ccc(cc1)F	✓
Cc1oc(nc1CCOc1cccc(c1)Cc1c(nnn1c1ccccc1)C(=O)O)c1ccccc1	✓
Cn1cc(c(c1)Cc1cccc(c1)OCCc1nc(oc1C)c1ccccc1)C(=O)O	✓
OC(=O)c1cn(cc1Cc1cccc(c1)OCCc1nc(oc1C)c1ccccc1)c1ccccc1	✓
OC(=O)c1nn(cc1Cc1cccc(c1)OCCc1nc(oc1C)c1ccccc1)c1ccccc1	✓
OC(=O)c1cn(nc1Cc1cccc(c1)OCCc1nc(oc1C)c1ccccc1)c1ccccc1	✓
OC(=O)c1nn(nc1Cc1cccc(c1)OCCc1nc(oc1C)c1ccccc1)c1ccccc1	✓
OC(=O)Cc1nn(nc1Cc1cccc(c1)OCCc1nc(oc1C)c1ccccc1)c1ccccc1	✓
Cc1oc(nc1CCOc1cccc(c1)Cc1nnn(c1C(=O)O)c1ccccc1)c1ccccc1	✓
OC(=O)CN(Cc1cc2c([nH]1)cccc2)Cc1cccc(c1)OCCc1nc(oc1C)c1ccccc1	✓
OC(=O)CN(Cc1ccc(cc1)Oc1ccccc1)Cc1cccc(c1)OCCc1nc(oc1C)c1ccccc1	✓
OC(=O)CN(Cc1ccc(cc1)OCc1ccccc1)Cc1cccc(c1)OCCc1nc(oc1C)c1ccccc1	✓
OC(=O)CN(Cc1ccc2c(c1)cccc2)Cc1cccc(c1)OCCc1nc(oc1C)c1ccccc1	✓
OC(=O)CN(Cc1cccc(c1)Oc1ccccc1)Cc1cccc(c1)OCCc1nc(oc1C)c1ccccc1	✓
OC(=O)CN(Cc1cccc2c1cccc2)Cc1cccc(c1)OCCc1nc(oc1C)c1ccccc1	✓
OC(=O)CN(Cc1ccccc1)Cc1cccc(c1)OCCc1nc(oc1C)c1ccccc1	✓
OC(=O)CN(Cc1cccc(c1)OCCc1nc(oc1C)c1ccccc1)CCc1ccccc1	✓
OC(=O)CN(Cc1cccc(c1)OCCc1nc(oc1C)c1ccccc1)CCCc1ccccc1	✓
OC(=O)C1(CCCO1)Cc1cnc(cn1)OCCc1nc(oc1C)c1ccccc1						✓	✓
OC(=O)C1(CCCO1)Cc1cnc(nc1)OCCc1nc(oc1C)c1ccccc1						✓	✓
OC(=O)CN(C(=O)OC1CCC1)Cc1cccc(c1)OCc1nc(oc1C)c1ccc(cc1)Cl	✓
OC(=O)CN(C(=O)OC1CCCC1)Cc1cccc(c1)OCc1nc(oc1C)c1ccc(cc1)Cl	✓
OC(=O)CN(C(=O)OC1CCCCC1)Cc1cccc(c1)OCc1nc(oc1C)c1ccc(cc1)Cl	✓
OC(=O)CN(C(=O)OCC1CC1)Cc1cccc(c1)OCc1nc(oc1C)c1ccc(cc1)Cl	✓
OC(=O)C(c1noc(c1)C)Cc1ccc(cc1)CCCc1nc(oc1C)c1ccccc1	✓
Cc1onc(c1)c1nc(c(s1)C)CCOc1ccc(cc1)C[C@@H](C(=O)O)Nc1ccccc1C(=O)c1ccccc1						✓	✓
OC(=O)COc1ccc(c(c1C)C)Sc1ccc(cc1OCc1noc(c1)C)COc1ccc(cc1)C(F)(F)F						✓	✓
OC(=O)[C@@H](Nc1ccccc1C(=O)c1ccccc1)Cc1ccc(cc1)OCCc1nc(sc1C)c1ccccc1						✓	✓
OC(=O)[C@@H](Nc1ccccc1C(=O)c1ccccc1)Cc1ccc(cc1)OCCc1nc(sc1C)c1ccncc1						✓	✓
OC(=O)[C@@H](Nc1ccccc1C(=O)c1ccccc1)Cc1ccc(cc1)OCCc1nc(sc1C)N1CCN(CC1)C(=O)OC(C)(C)C						✓	✓
OC(=O)[C@@H](Nc1ccccc1C(=O)c1ccccc1)Cc1ccc(cc1)OCCc1nc(sc1C)N1CCN(CC1)S(=O)(=O)C						✓	✓
OC(=O)[C@@H](Nc1ccccc1C(=O)c1ccccc1)Cc1ccc(cc1)OCCc1nc(sc1C)N1CCNCC1						✓	✓
OC(=O)[C@@H](Nc1ccccc1C(=O)c1ccccc1)Cc1ccc(cc1)OCCc1nc(sc1C)N1CCOCC1						✓	✓
CCC#CCOc1cc(ccc1Sc1ccc(c2c1CCCC2)OCC(=O)O)COc1ccc(cc1)C(F)(F)F						✓	✓
CCC#CCOc1cc(ccc1Sc1ccc(c2c1CCCC2)OCC(=O)O)COc1ccc(cc1)Cl						✓	✓
CCC#CCOc1cc(ccc1Sc1ccc(c2c1CCCC2)OCC(=O)O)COc1ccc(cc1C)Cl						✓	✓
CCC#CCOc1cc(ccc1Sc1ccc(c2c1CCCC2)OCC(=O)O)COc1ccc(cn1)C(F)(F)F						✓	✓
CCC#CCOc1cc(ccc1Sc1ccc(c2c1CCCC2)OCC(=O)O)COc1cccc(c1)C(F)(F)F						✓	✓
CCC#CCOc1cc(COC2CCCC2)ccc1Sc1ccc(c2c1CCCC2)OCC(=O)O						✓	✓
CCC#CCOc1cc(ccc1Sc1ccc(c2c1CCCC2)OCC(=O)O)COc1ccccc1C(F)(F)F						✓	✓
CCC#CCOc1cc(COC2CCOCC2)ccc1Sc1ccc(c2c1CCCC2)OCC(=O)O						✓	✓
CCC#CCOc1cc(COCC2CC2)ccc1Sc1ccc(c2c1CCCC2)OCC(=O)O						✓	✓
CCC(c1ccccc1)C(=O)Nc1ccc2c(c1)c(C)c(n2Cc1ccc(cc1)c1ccccc1C(=O)O)C	✓
CCC(c1ccc(c(c1)Cl)OCCCOc1ccc2c(c1)O[C@@](CC2)(C)C(=O)O)(C)C	✓
CCC(C(=O)O)(Cc1ccc(cc1)OCCCOc1ccc(cc1Cl)Oc1ccc(cc1)F)C	✓
CCC(C(=O)O)(Oc1ccccc1)Cc1ccc(cc1)OCCc1nc(oc1C)c1ccccc1	✓
CCC(C(=O)O)Cc1ccc(nc1)OCCc1nc(oc1C)c1ccccc1						✓	✓
CCC(Oc1ccc(cc1C(=O)c1ccccc1)CC)CCOc1ccc(c(c1)C)CCC(=O)O	✓
CCC(c1ccccc1)NC(=O)c1ccc2c(c1)c(C)c(n2Cc1ccc(cc1)c1ccccc1C#N)C	✓
CCC(c1ccccc1)NC(=O)c1ccc2c(c1)c(C)c(n2Cc1ccc(cc1)c1ccccc1C(=O)O)C	✓
CCC(c1ccccc1)NC(=O)c1ccc2c(c1)c(C)c(n2Cc1ccc(cc1)c1ccccc1c1[nH]nnn1)C	✓
CCC(c1ccccc1)NC(=O)c1ccc2c(c1)c(C)c(n2Cc1ccc(cc1)Cl)C	✓
CCC(c1ccccc1)NC(=O)c1ccc2c(c1)c(C)c(n2Cc1ccccc1c1cccc(c1)C(=O)O)C	✓
CCC(c1ccccc1)NC(=O)c1ccc2c(c1)c(C)cn2Cc1ccc(cc1)c1ccccc1C(=O)O	✓
CCC(c1ccccc1)NC(=O)c1ccc2c(c1)c(SC)c(n2Cc1ccc(cc1)c1ccccc1C(=O)O)C	✓
CCC(c1ccccc1)NC(=O)c1ccc2c(c1)cc(n2Cc1ccc(cc1)c1ccccc1C(=O)O)C	✓
CCC(c1ccccc1)NC(=O)c1ccc2c(c1)ccn2C(=O)c1cccc(c1F)F	✓
CCC(c1ccccc1)NC(=O)c1ccc2c(c1)ccn2C(=O)c1ccccc1	✓
CCC(c1ccccc1)NC(=O)c1ccc2c(c1)ccn2Cc1ccc(cc1)c1ccccc1C(=O)O	✓
CCC(c1ccccc1)NC(=O)c1ccc2c(c1)ccn2Cc1ccc(nc1)Cl	✓
CCC(c1ccccc1)NC(=O)c1ccc2c(c1)ccn2Cc1ccc(cc1F)F	✓
CCC(c1ccccc1)NC(=O)c1ccc2c(c1)ccn2Cc1cccc(c1)c1ccc(cc1)C(=O)O	✓
CCC(c1ccccc1)NC(=O)c1ccc2c(c1)ccn2Cc1cccc(c1)c1ccccc1C(=O)O	✓
CCC(c1ccccc1)NC(=O)c1ccc2c(c1)ccn2Cc1ccccc1c1ccc(cc1)C(=O)O	✓
CCC(c1ccccc1)NC(=O)c1ccc2c(c1)ccn2Cc1ccccc1c1cccc(c1)C(=O)O	✓
CCC(c1ccccc1)NC(=O)c1ccc2c(c1)ccn2S(=O)(=O)c1ccc(cc1)C	✓
CCC(c1ccccc1)NC(=O)c1ccc2c(c1)ccn2S(=O)(=O)c1cccc2c1cccc2	✓
CCC(c1ccccc1)NC(=O)c1ccc2c(c1)n(Cc1ccc(cc1)c1ccccc1C(=O)O)c(c2)C	✓
CCC(C(=O)O)Oc1cccc(c1)Cc1c(C)n(c2c1cc(cc2)OC(F)(F)F)C(=O)c1ccc(cc1)OC	✓
COc1ccc(cc1)C(=O)n1c(C)c(c2c1ccc(c2)OC(F)(F)F)Cc1ccccc1OC(C(=O)O)CC	✓
CCC[C@H](C(=O)O)Oc1cccc(c1)Cn1c(C)c(c2c1cc(cc2)OC(F)(F)F)C(=O)c1ccc(cc1)Cl	✓
CCC[C@@H](c1ccccc1)NC(=O)c1ccc2c(c1)c(C)c(n2Cc1ccc(cc1)c1ccccc1C(=O)O)C	✓
CCC[C@@H](C(=O)O)Oc1cccc(c1)Cn1c(C)c(c2c1cc(cc2)OC(F)(F)F)C(=O)c1ccc(cc1)Cl	✓
CCC1(Oc2c(C1)cc(cc2)OCCCOc1ccc(cc1Cl)CC(C)(C)C)C(=O)O	✓
CCC1(Oc2c(C1)cc(cc2)OCCCOc1ccc(cc1Cl)C(C)(C)C)C(=O)O	✓
CCC1(Oc2c(C1)cc(cc2)OCCCOc1ccc(cc1Cl)SC(F)(F)F)C(=O)O	✓
CCC1(Cc2c(O1)cc(cc2)OCCCOc1ccc(cc1Cl)OC(F)(F)F)C(=O)O	✓
CCC1(CCc2c(O1)cc(cc2)OCCCOc1ccc(cc1Cl)Oc1ccccc1)C(=O)O	✓
CCC1(CCc2c(O1)cc(cc2)OCCCOc1ccc(cc1F)Oc1ccccc1)C(=O)O	✓
COC(=O)c1cc2c(c(c1CC)O)C(=O)c1c(C2=O)c2c(cc1O)cc(c(c2OC)Cl)C	✓
CCc1cc(ccc1C(=O)NCc1cccc(c1)Oc1ccc(c(c1)C)OC(C(=O)O)(C)C)C(F)(F)F	✓
CCc1cc(ccc1CCC(=O)O)Oc1cc(F)cc(c1)[C@H](NC(=O)c1n(C)c2c(c1C)cc(cc2)Cl)C	✓
CCc1cc(ccc1CCC(=O)O)Oc1cc(F)cc(c1)[C@H](NC(=O)c1sc2c(c1C)cc(cc2)Cl)C	✓
CCc1cc(OCC[C@H](Oc2ccc(cc2c2ccccn2)C(F)(F)F)C)ccc1CCC(=O)O	✓
CCc1cc(OCC[C@H](Oc2ccc(cc2Oc2ccccc2)Cl)C)ccc1CCC(=O)O	✓
CCc1ccc(cc1)[C@@H](NC(=O)c1ccc2c(c1)c(C)c(n2Cc1ccc(cc1)c1ccccc1C(=O)O)C)C	✓
CCc1ccc(nc1)CCOc1ccc(cc1)C[C@@H](C(=O)O)Nc1ccccc1C(=O)c1ccccc1						✓
CCc1ccc(cc1)CCOc1ccc(cc1)CC1SC(=O)NC1=O						✓	✓	✓
CCc1ccc(nc1)CCOc1ccc(cc1)CC1SC(=O)NC1=O	✓	✓				✓	✓	✓
CCc1ccc(cc1)COc1ccc(cc1)C[C@@H](C(=O)O)Nc1ccccc1C(=O)c1ccccc1						✓	✓
CCc1ccc(c(c1)C(=O)c1ccccc1)O[C@H](CCOc1ccc(c(c1)C)CCC(=O)O)C	✓
CCc1ccc(c(c1)C(=O)c1ccccc1)O[C@@H](CCOc1ccc(c(c1)C)CCC(=O)O)C	✓
CCc1ccc(c(c1)c1ccccc1)O[C@@H](CCOc1ccc(c(c1)C)CCC(=O)O)C	✓
CCc1ccc(c(c1)c1ccccn1)O[C@@H](CCOc1ccc(c(c1)C)CCC(=O)O)C	✓
CCc1ccc(c(c1)c1cccnc1)O[C@@H](CCOc1ccc(c(c1)C)CCC(=O)O)C	✓
CCc1ccc(c(c1)c1cccs1)O[C@@H](CCOc1ccc(c(c1)C)CCC(=O)O)C	✓
CCc1ccc(c(c1)c1ccncc1)O[C@@H](CCOc1ccc(c(c1)C)CCC(=O)O)C	✓
CCc1ccc(c(c1)c1cscc1)O[C@@H](CCOc1ccc(c(c1)C)CCC(=O)O)C	✓
CCc1ccc(c(c1)c1cocn1)O[C@@H](CCOc1ccc(c(c1)C)CCC(=O)O)C	✓
CCc1ccc(c(c1)c1cscn1)O[C@@H](CCOc1ccc(c(c1)C)CCC(=O)O)C	✓
CCc1ccc(c(c1)c1nccs1)O[C@@H](CCOc1ccc(c(c1)C)CCC(=O)O)C	✓
CCc1ccc(c(c1)c1ccco1)O[C@@H](CCOc1ccc(c(c1)C)CCC(=O)O)C	✓
CCc1ccc(c(c1)c1ncco1)O[C@@H](CCOc1ccc(c(c1)C)CCC(=O)O)C	✓
CCc1ccc(c(c1)Cc1ccccc1)O[C@@H](CCOc1ccc(c(c1)C)CCC(=O)O)C	✓
CCc1ccc(c(c1)Oc1ccccc1)O[C@@H](CCOc1ccc(c(c1)C)CCC(=O)O)C	✓
CCc1cc(OCC[C@H](Oc2ccc(cc2c2ccccn2)CC)C)ccc1CCC(=O)O	✓
CCc1ccc(c(c1)C(=O)c1ccccc1)O[C@@H](CCOc1ccc(cc1)OC(C(=O)O)(C)C)C	✓
CCc1ccc(c(c1)C(=O)c1ccccc1)OC(CCOc1ccc(c(c1)C)CCC(=O)O)C	✓
CCc1ccc(c(c1)Cc1ccccc1)OC(CCOc1ccc(c(c1)C)CCC(=O)O)C	✓
CCc1ccc(c(c1)C(=O)c1ccccc1)OC(CCOc1ccc(cc1)OC(C(=O)O)(C)C)C	✓
CCc1ccc(c(c1)C(=O)c1ccccc1)OCCCOc1ccc(cc1)OC(C(=O)O)(C)C	✓
CCc1ccccc1[C@@H](NC(=O)c1ccc2c(c1)c(C)c(n2Cc1ccc(cc1)c1ccccc1C(=O)O)C)C	✓
CCc1ccccc1COc1ccc(cc1)C[C@@H](C(=O)O)Nc1ccccc1C(=O)c1ccccc1						✓	✓
CCCC(=O)NC[C@@H](Nc1ccccc1C(=O)c1ccccc1)Cc1ccc(cc1)OCCc1nc(oc1C)c1ccccc1	✓					✓	✓
CCCC(C(=O)O)Cc1ccc(nc1)OCCc1nc(oc1C)c1ccccc1						✓	✓
CCCC(Oc1ccc(cc1C(=O)c1ccccc1)CC)CCOc1ccc(c(c1)C)CCC(=O)O	✓
CCCC(C(=O)O)Oc1cccc(c1)Cc1c(C)n(c2c1cc(cc2)OC(F)(F)F)C(=O)c1ccc(cc1)OC	✓
CCCC[C@](C(=O)O)(Oc1ccccc1)Cc1ccc(cc1)OCCc1nc(oc1C)c1ccccc1	✓
CCCC[C@@H](c1cccc(c1)C(C)C)NC(=O)c1ccc2c(c1)c(C)c(n2Cc1ccc(cc1)c1ccccc1)C	✓
CCCC[C@@H](c1cccc(c1)C(C)C)NC(=O)c1ccc2c(c1)c(C)c(n2Cc1ccc(cc1)c1ccccc1C(=O)O)C	✓
CCCc1c([nH]c2c1cc(cc2)CC(=O)O)c1ccccc1						✓	✓		✓
CCCc1c([nH]c2c1cc(cc2)C(=O)O)c1ccccc1						✓	✓
CCCc1c(OC(c2ccccc2)C(=O)O)c(Cl)cc(c1O)C(=O)CC						✓	✓		✓
CCCc1c(OCCCSc2ccc(cc2Cl)CC(=O)O)ccc(c1O)/C(=N\O)/CC	✓		✓
CCCc1c(OCCCSc2ccc(cc2Cl)CC(=O)O)ccc(c1O)/C(=N/O)/CC	✓		✓
CCCc1c(OCCCSc2ccc(cc2Cl)CC(=O)O)ccc(c1O)C(=O)C	✓		✓
CCCc1c(OCCCSc2ccc(cc2Cl)CC(=O)O)ccc(c1O)C(=O)CC	✓		✓
CCCc1c(cccc1O[C@H](C(=O)O)C)Oc1c(C)n(c2c1cc(cc2)OC(F)(F)F)c1noc2c1ccc(c2)Cl	✓
CCCc1c(O[C@@H](c2ccc(cc2)C(C)C)C(=O)O)c(Cl)cc2c1oc(=O)n2CC	✓		✓
CCCc1c(OC(c2ccccc2)C(=O)O)c(Cl)cc2c1onc2CC						✓	✓		✓
CCCc1c(OC(c2ccccc2)C(=O)O)ccc2c1onc2C(F)(F)F						✓	✓		✓
CCCc1c(OCC(COc2cccc3c2ccn3CC(=O)O)C)ccc2c1onc2C(F)(F)F	✓
CCCc1c(OCCC(CCOc2ccc3c(c2)ccn3CC(=O)O)C)ccc2c1onc2C(F)(F)F	✓
CCCc1c(OCCC(CCOc2cccc3c2ccn3CC(=O)O)C)ccc2c1onc2C(F)(F)F	✓
CCCc1c(OCCCCCOc2ccc3c(c2)ccn3CC(=O)O)ccc2c1onc2C(F)(F)F	✓
CCCc1c(OCCCCCOc2cccc3c2ccn3CC(=O)O)ccc2c1onc2C(F)(F)F	✓
CCCc1c(OCCCCOc2ccc(cc2)/C=C/C(=O)O)ccc2c1onc2c1ccccc1						✓	✓
CCCc1c(OCCCCOc2ccc(cc2)CC(=O)O)ccc2c1onc2c1ccccc1						✓	✓		✓
CCCc1c(OCCCCOc2ccc(cc2)CC(C(=O)O)(C)C)ccc2c1onc2c1ccccc1						✓	✓
CCCc1c(OCCCCOc2ccc(cc2)C(C(=O)O)(C)C)ccc2c1onc2c1ccccc1						✓	✓		✓
CCCc1c(OCCCCOc2ccc(cc2)C(CC(=O)O)(C)C)ccc2c1onc2c1ccccc1						✓	✓
CCCc1c(OCCCCOc2ccc(cc2)CCC(=O)O)ccc2c1onc2c1ccccc1						✓	✓
CCCc1c(OCCCCOc2ccc(cc2)OC(C(=O)O)(C)C)ccc2c1onc2c1ccccc1						✓	✓
CCCc1c(OCCCCOc2ccc(cc2)OC(C(=O)O)C)ccc2c1onc2c1ccccc1						✓	✓
CCCc1c(OCCCCOc2ccc3c(c2)ccn3CC(=O)O)ccc2c1onc2C(F)(F)F	✓
CCCc1c(OCCCCOc2cccc(c2)C(=O)O)ccc2c1onc2c1ccccc1						✓	✓
CCCc1c(OCCCCOc2cccc(c2)C(C(=O)O)(C)C)ccc2c1onc2c1ccccc1						✓	✓		✓
CCCc1c(OCCCCOc2cccc(c2)CC(=O)O)ccc2c1onc2c1ccccc1						✓	✓		✓
CCCc1c(OCCCCOc2cccc(c2)CCC(=O)O)ccc2c1onc2c1ccccc1						✓	✓
CCCc1c(OCCCCOc2cccc(c2)OC(C(=O)O)(C)C)ccc2c1onc2c1ccccc1						✓	✓
CCCc1c(OCCCCOc2cccc(c2)OCC(=O)O)ccc2c1onc2c1ccccc1						✓	✓
CCCc1c(OCCCCOc2cccc3c2ccn3CC(=O)O)ccc2c1onc2C(F)(F)F	✓
CCCc1c(OCCCCOc2ccccc2CC(=O)O)ccc2c1onc2c1ccccc1						✓	✓		✓
CCCc1c(OCCCN(c2ccc(c(c2)C)CC(=O)O)C)ccc2c1onc2C(F)(F)F	✓		✓
CCCc1c(OCCCN(c2ccc(cc2)CC(=O)O)C)ccc2c1onc2C(F)(F)F	✓		✓
CCCc1c(OCCCN(c2ccc(cc2C)CC(=O)O)C)ccc2c1onc2C(F)(F)F	✓		✓
CCCc1c(OCCCN(c2cccc(c2)CC(=O)O)C)ccc2c1onc2C(F)(F)F	✓		✓
CCCc1c(OCCCn2ccc3c2ccc(c3)CC(=O)O)ccc2c1onc2C(F)(F)F	✓		✓
CCCc1c(OCCCn2ccc3c2ccc(c3)CCC(=O)O)ccc2c1onc2C(F)(F)F	✓
CCCc1c(OCCCNc2ccc(cc2)CC(=O)O)ccc2c1onc2C(F)(F)F	✓		✓
CCCc1c(OCCCOc2ccc(cc2)/C=C/C(=O)O)ccc2c1onc2c1ccccc1						✓	✓
CCCc1c(OCCCOc2ccc(cc2)CC(=O)O)ccc2c1onc2C(F)(F)F	✓		✓
CCCc1c(OCCCOc2ccc(cc2)CC(=O)O)ccc2c1onc2c1ccccc1						✓	✓		✓
CCCc1c(OCCCOc2ccc(cc2Cl)CC(=O)O)ccc2c1onc2C(F)(F)F	✓		✓
CCCc1c(OCCCOc2ccc(cc2)CCC(=O)O)ccc2c1onc2c1ccccc1						✓	✓
CCCc1c(OCCCOc2ccc(cc2)CCCC(=O)O)ccc2c1onc2c1ccccc1						✓	✓
CCCc1c(OCCCOc2ccc(cc2)OC(C(=O)O)C)ccc2c1onc2c1ccccc1						✓	✓
CCCc1c(OCCCOc2ccc(cc2)OCC(=O)O)ccc2c1onc2c1ccccc1						✓	✓
CCCc1c(OCCCOc2ccc3c(c2)ccn3C(C(=O)O)CC)ccc2c1onc2C(F)(F)F	✓
CCCc1c(OCCCOc2ccc3c(c2)ccn3CC(=O)O)ccc2c1[nH]cc2C#N	✓
CCCc1c(OCCCOc2ccc3c(c2)ccn3CC(=O)O)ccc2c1[nH]cc2C(=O)C(F)(F)F	✓
CCCc1c(OCCCOc2ccc3c(c2)ccn3CC(=O)O)ccc2c1onc2C(F)(F)F	✓
CCCc1c(OCCCOc2ccc3c(c2)ccn3CC(=O)O)ccc2c1onc2c1ccccc1	✓
CCCc1c(OCCCOc2ccc3c(c2)ccn3CC(=O)O)ccc2c1ccc(c2)C(=O)c1ccccc1	✓
CCCc1c(OCCCOc2ccc3c(c2)ccn3Cc2n[nH]nn2)ccc2c1onc2C(F)(F)F	✓
CCCc1c(OCCCOc2ccc3c(c2)ccn3CCC(=O)O)ccc2c1onc2C(F)(F)F	✓
CCCc1c(OCCCOc2ccc3c(c2)n(cc3)CC(=O)O)ccc2c1onc2C(F)(F)F	✓
CCCc1c(OCCCOc2ccc3c(c2)n(cc3)CC(=O)O)ccc2c1ccc(c2)C(=O)c1ccccc1	✓
CCCc1c(OCCCOc2cccc(c2)CC(=O)O)ccc2c1onc2c1ccccc1						✓	✓		✓
CCCc1c(OCCCOc2cccc(c2)CCC(=O)O)ccc2c1onc2c1ccccc1						✓	✓
CCCc1c(OCCCOc2cccc3c2ccn3C(C(=O)O)CC)ccc2c1onc2C(F)(F)F	✓
CCCc1c(OCCCOc2cccc3c2ccn3CC(=O)O)ccc2c1occ2c1ccccc1	✓
CCCc1c(OCCCOc2cccc3c2ccn3CC(=O)O)ccc2c1onc2C(F)(F)F	✓
CCCc1c(OCCCOc2cccc3c2ccn3CC(=O)O)ccc2c1onc2c1ccccc1	✓
CCCc1c(OCCCOc2cccc3c2ccn3CC(=O)O)ccc2c1[nH]c(c2)c1ccccc1	✓
CCCc1c(OCCCOc2cccc3c2ccn3CC(=O)O)ccc2c1ccc(c2)C(=O)c1ccccc1	✓
CCCc1c(OCCCOc2cccc3c2ccn3CC(=O)O)ccc2c1oc(c2)c1ccccc1	✓
CCCc1c(OCCCOc2cccc3c2ccn3CC(=O)O)ccc2c1[nH]cc2	✓
CCCc1c(OCCCOc2cccc3c2ccn3CCC(=O)O)ccc2c1onc2C(F)(F)F	✓
CCCc1c(OCCCOc2ccccc2CC(=O)O)ccc2c1onc2c1ccccc1						✓	✓		✓
CCCc1c(OCCCOc2ccccc2CCC(=O)O)ccc2c1onc2c1ccccc1						✓	✓
CCCc1c(OCCCSc2ccc(cc2Cl)CC(=O)O)ccc2c1occ2CC	✓		✓
CCCc1c(OCCCSc2ccc(cc2Cl)CC(=O)O)ccc2c1onc2CC	✓		✓
CCCc1c(OCCCSc2ccc(cc2Cl)CC(=O)O)ccc2c1occ2c1ccccc1	✓		✓
CCCc1c(OCCCSc2ccc(cc2Cl)CC(=O)O)ccc2c1onc2C(F)(F)F	✓		✓
CCCc1c(OCCCSc2ccc(cc2Cl)CC(=O)O)ccc2c1onc2c1ccccc1						✓	✓		✓
CCCc1c(OCCOc2ccc(cc2)CCC(=O)O)ccc2c1onc2c1ccccc1						✓	✓
CCCc1c(OCCOc2ccc(cc2)CCCC(=O)O)ccc2c1onc2c1ccccc1						✓	✓
CCCc1c(OCCOc2ccc3c(c2)ccn3CC(=O)O)ccc2c1onc2C(F)(F)F	✓
CCCc1c(OCCOc2cccc3c2ccn3CC(=O)O)ccc2c1onc2C(F)(F)F	✓
CCCc1c(SC)c2c(n1Cc1ccc(cc1)c1ccccc1C(=O)O)ccc(c2)NC(=O)C(c1ccccc1)CC	✓
CCCc1c(SC)c2c(n1Cc1ccc(cc1)c1ccccc1C(=O)O)cc(cc2)NC(=O)C(c1ccccc1)CC	✓
CCCc1cc(C(=O)CC)c(c(c1OC(c1ccccc1)C(=O)O)CCC)O						✓	✓		✓
CCCc1cc(ccc1OCCCOc1cccc(c1)[C@@H]1SC(=O)NC1=O)C=C1CCCCC1	✓	✓
CCCc1cc(ccc1OCCCOc1cccc(c1)C1SC(=O)NC1=O)C=C1CCCCC1	✓	✓
CCCc1cc(cc(c1OC(c1ccc(cc1)C(C)C)C(=O)O)C)C(=O)CC	✓		✓
CCCc1cc(cc(c1OC(c1ccccc1)C(=O)O)C)C(=O)OC						✓	✓		✓
CCCc1cc(cc(c1O[C@H](c1ccc(cc1)C(C)C)C(=O)O)CCC)C(=O)CC	✓		✓
CCCc1cc(cc(c1O[C@@H](c1ccc(cc1)CC(C)C)C(=O)O)CCC)C(=O)CC	✓		✓
CCCc1cc(cc(c1O[C@@H](c1ccc(cc1)CC)C(=O)O)CCC)C(=O)CC	✓		✓
CCCc1cc(cc(c1O[C@@H](c1ccc(cc1)C(C)C)C(=O)O)CCC)C(=O)CC	✓		✓
CCCc1cc(cc(c1O[C@@H](c1ccc(cc1)C(F)(F)F)C(=O)O)CCC)C(=O)CC	✓		✓
CCCc1cc(cc(c1O[C@@H](c1ccc(cc1)OC(C)C)C(=O)O)CCC)C(=O)CC	✓		✓
CCCc1cc(cc(c1OC(c1ccccc1)C(=O)O)CCC)C(=O)C(C)(C)C	✓		✓
CCCc1cc(cc(c1OC(c1ccccc1)C(=O)O)CCC)C(=O)C(C)C	✓		✓
CCCc1cc(cc(c1OC(c1ccccc1)C(=O)O)CCC)C(=O)c1ccccc1	✓		✓
CCCc1cc(cc(c1OC(c1ccccc1)C(=O)O)CCC)C(=O)CC	✓		✓
CCCc1cc(cc(c1OC(c1ccccc1)C(=O)O)CCC)C(=O)OC						✓	✓		✓
CCCc1cc(cc(c1OC(C(=O)O)(C)C)CCC)C(=O)CC	✓
CCCc1cc(cc(c1O[C@@H](c1ccc(cc1)C(C)C)C(=O)O)Cl)C(=O)CC	✓		✓
CCCc1cc(cc(c1OC(c1ccccc1)C(=O)O)Cl)C(=O)OC						✓	✓		✓
CCCc1cc(ccc1OCCCOc1cccc(c1)[C@H]1SC(=O)NC1=O)CC1CCCCC1	✓	✓
CCCc1cc(ccc1OCCCOc1cccc(c1)C1SC(=O)NC1=O)CC1CCCCC1	✓	✓
CCCc1cc(ccc1OCCCOc1ccc2c(c1)ccn2CC(=O)O)C(=O)c1ccc(cc1)F	✓
CCCc1cc(ccc1OCCCOc1ccc2c(c1)n(cc2)CC(=O)O)C(=O)c1ccc(cc1)F	✓
CCCc1cc(ccc1OCCCOc1cccc(c1)[C@@H]1OC(=O)NC1=O)[C@@H]1CC[C@H](CC1)O	✓
CCCc1cc(ccc1OCCCOc1cccc(c1)[C@@H]1OC(=O)NC1=O)C1CCC(CC1)(C)C	✓
CCCc1cc(ccc1OCCCOc1cccc(c1)[C@@H]1OC(=O)NC1=O)C1CCC(CC1)(F)F	✓
CCCc1cc(ccc1OCCCOc1cccc(c1)[C@@H]1OC(=O)NC1=O)c1ccccc1	✓
CCCc1cc(ccc1OCCCOc1cccc(c1)[C@@H]1OC(=O)NC1=O)C1CCCCCC1	✓
CCCc1cc(ccc1OCCCOc1cccc(c1)[C@@H]1OC(=O)NC1=O)C1CCOCC1	✓
CCCc1cc(ccc1OCCCOc1cccc(c1)[C@@H]1SC(=O)NC1=O)C(=O)C1CCCCC1	✓	✓
CCCc1cc(ccc1OCCCOc1cccc(c1)[C@@H]1SC(=O)NC1=O)c1noc2c1cccc2	✓	✓
CCCc1cc(ccc1OCCCOc1cccc(c1)[C@H]1OC(=O)NC1=O)C1CCC(=O)CC1	✓
CCCc1cc(ccc1OCCCOc1cccc(c1)[C@H]1OC(=O)NC1=O)C1CCCC1	✓
CCCc1cc(ccc1OCCCOc1cccc(c1)[C@H]1OC(=O)NC1=O)C1CCCCC1	✓
CCCc1cc(ccc1OCCCOc1cccc(c1)[C@H]1SC(=O)NC1=O)C(=O)c1ccc(cc1)Cl	✓	✓
CCCc1cc(ccc1OCCCOc1cccc(c1)[C@H]1SC(=O)NC1=O)C1CCCCC1	✓	✓
CCCc1cc(ccc1OCCCOc1cccc(c1)[C@H]1SC(=O)NC1=O)c1noc2c1cccc2	✓	✓
CCCc1cc(ccc1OCCCOc1cccc(c1)C1OC(=O)NC1=O)C1CCC(=O)CC1	✓
CCCc1cc(ccc1OCCCOc1cccc(c1)C1OC(=O)NC1=O)C1CCC(CC1)(C)C	✓
CCCc1cc(ccc1OCCCOc1cccc(c1)C1OC(=O)NC1=O)C1CCC(CC1)(F)F	✓
CCCc1cc(ccc1OCCCOc1cccc(c1)C1OC(=O)NC1=O)C1CCC(CC1)O	✓
CCCc1cc(ccc1OCCCOc1cccc(c1)C1OC(=O)NC1=O)C1CCCC1	✓
CCCc1cc(ccc1OCCCOc1cccc(c1)C1OC(=O)NC1=O)c1ccccc1	✓
CCCc1cc(ccc1OCCCOc1cccc(c1)C1OC(=O)NC1=O)C1CCCCCC1	✓
CCCc1cc(ccc1OCCCOc1cccc(c1)C1OC(=O)NC1=O)C1CCOCC1	✓
CCCc1cc(ccc1OCCCOc1cccc(c1)C1SC(=O)NC1=O)C(=O)c1ccc(cc1)Cl	✓	✓
CCCc1cc(ccc1OCCCOc1cccc(c1)C1SC(=O)NC1=O)C(=O)c1ccccc1	✓	✓
CCCc1cc(ccc1OCCCOc1cccc(c1)C1SC(=O)NC1=O)c1noc2c1cccc2	✓	✓
CCCc1cc(ccc1OCCCOc1cccc2c1ccn2CC(=O)O)C(=O)c1ccc(cc1)F	✓
CCCc1cc(ccc1OCCCOc1ccc(cc1)C1SC(=O)NC1=O)Oc1ccc(cc1)C	✓	✓
CCCc1cc(ccc1OCCCOc1ccc(cc1)C1SC(=O)NC1=O)Oc1ccc(cc1)CC(C)C	✓	✓
CCCc1cc(ccc1OCCCOc1cccc(c1)[C@@H]1SC(=O)NC1=O)Oc1ccc(cc1)CC(C)C	✓	✓
CCCc1cc(ccc1OCCCOc1cccc(c1)C1SC(=O)NC1=O)Oc1ccc(cc1)CC(C)C	✓	✓
CCCc1cc(ccc1OCCCOc1cccc(c1)[C@H]1SC(=O)NC1=O)Oc1ccc(cc1)C(C)(C)C	✓	✓
CCCc1cc(ccc1OCCCOc1cccc(c1)C1SC(=O)NC1=O)Oc1ccc(cc1)C(C)(C)C	✓	✓
CCCc1cc(ccc1OCCCOc1cccc(c1)[C@H]1SC(=O)NC1=O)Oc1ccc(cc1)C(C)C	✓	✓
CCCc1cc(ccc1OCCCOc1cccc(c1)C1SC(=O)NC1=O)Oc1ccc(cc1)C(C)C	✓	✓
CCCc1cc(ccc1OCCCOc1ccc(cc1)C1SC(=O)NC1=O)Oc1ccc(cc1)C(F)(F)F	✓	✓
CCCc1cc(ccc1OCCCOc1ccc(cc1)C1SC(=O)NC1=O)Oc1ccc(cc1)C1CCCC1	✓	✓
CCCc1cc(ccc1OCCCOc1cccc(c1)C1SC(=O)NC1=O)Oc1ccc(cc1)C1CCCC1	✓	✓
CCCc1cc(ccc1OCCCOc1ccc(cc1)C1SC(=O)NC1=O)Oc1ccc(cc1)c1ccccc1	✓	✓
CCCc1cc(ccc1OCCCOc1cccc(c1)[C@@H]1SC(=O)NC1=O)Oc1ccc(cc1)c1ccccc1	✓	✓
CCCc1cc(ccc1OCCCOc1cccc(c1)C1SC(=O)NC1=O)Oc1ccc(cc1)c1ccccc1	✓	✓
CCCc1cc(ccc1OCCCOc1ccc(cc1)C1SC(=O)NC1=O)Oc1ccc(cc1)S(=O)(=O)C	✓	✓
CCCc1cc(ccc1OCCCOc1ccc2c(c1)OC(CC2)(CC)C(=O)O)Oc1ccc(cc1)S(=O)(=O)C	✓
CCCc1cc(ccc1OCCCOc1cccc(c1)[C@@H]1SC(=O)NC1=O)Oc1ccc(c(c1)C)Cl	✓	✓
CCCc1cc(ccc1OCCCOc1cccc(c1)C1SC(=O)NC1=O)Oc1ccc(c(c1)C)Cl	✓	✓
CCCc1cc(ccc1OCCCOc1cccc(c1)C1SC(=O)NC1=O)Oc1ccc(c(c1)Cl)Cl	✓	✓
CCCc1cc(ccc1OCCCOc1ccc(cc1)C1SC(=O)NC1=O)Oc1ccc(cc1)Cl	✓	✓
CCCc1cc(ccc1OCCCOc1ccc2c(c1)OC(CC2)(CC)C(=O)O)Oc1ccc(cc1)Cl	✓
CCCc1cc(ccc1OCCCOc1cccc(c1)[C@H]1SC(=O)NC1=O)Oc1ccc(cc1)Cl	✓	✓
CCCc1cc(ccc1OCCCOc1cccc(c1)C1SC(=O)NC1=O)Oc1ccc(cc1)Cl	✓	✓
CCCc1cc(ccc1OCCCOc1cccc(c1)[C@H]1SC(=O)NC1=O)Oc1ccc(c(c1)C)F	✓	✓
CCCc1cc(ccc1OCCCOc1cccc(c1)C1SC(=O)NC1=O)Oc1ccc(c(c1)C)F	✓	✓
CCCc1cc(ccc1OCCCOc1ccc(cc1)CC(C(=O)O)(C)C)Oc1ccc(cc1)F	✓
CCCc1cc(ccc1OCCCOc1ccc(cc1)[C@H]1SC(=O)NC1=O)Oc1ccc(cc1)F	✓	✓
CCCc1cc(ccc1OCCCOc1ccc(cc1)C1SC(=O)NC1=O)Oc1ccc(cc1)F	✓	✓
CCCc1cc(ccc1OCCCOc1ccc2c(c1)OC(CC2)(CC)C(=O)O)Oc1ccc(cc1)F	✓
CCCc1cc(ccc1OCCCOc1cccc(c1)[C@@H]1SC(=O)NC1=O)Oc1ccc(cc1)F	✓	✓
CCCc1cc(ccc1OCCCOc1cccc(c1)C1SC(=O)NC1=O)Oc1ccc(cc1)F	✓	✓
CCCc1cc(ccc1OCCCOc1ccc(cc1)C1SC(=O)NC1=O)Oc1ccc(cc1)NS(=O)(=O)C	✓	✓
CCCc1cc(ccc1OCCCOc1ccc(cc1)C1SC(=O)NC1=O)Oc1ccc(cc1)NS(=O)(=O)c1ccc(cc1)C	✓	✓
CCCc1cc(ccc1OCCCOc1cccc(c1)[C@@H]1SC(=O)NC1=O)Oc1ccc(cc1)O	✓	✓
CCCc1cc(ccc1OCCCOc1cccc(c1)[C@H]1SC(=O)NC1=O)Oc1ccc(cc1)O	✓	✓
CCCc1cc(ccc1OCCCOc1cccc(c1)C1SC(=O)NC1=O)Oc1ccc(cc1)O	✓	✓
CCCc1cc(ccc1OCCCOc1ccc(cc1)C1SC(=O)NC1=O)Oc1ccc(cc1)OC	✓	✓
CCCc1cc(ccc1OCCCOc1ccc2c(c1)OC(CC2)(CC)C(=O)O)Oc1ccc(cc1)OC	✓
CCCc1cc(ccc1OCCCOc1cccc(c1)[C@@H]1SC(=O)NC1=O)Oc1ccc(cc1)OC	✓	✓
CCCc1cc(ccc1OCCCOc1cccc(c1)C1SC(=O)NC1=O)Oc1ccc(cc1)OC	✓	✓
CCCc1cc(ccc1OCCCOc1cccc(c1)[C@@H]1SC(=O)NC1=O)OC1CCCC1	✓	✓
CCCc1cc(ccc1OCCCOc1cccc(c1)[C@H]1SC(=O)NC1=O)OC1CCCC1	✓	✓
CCCc1cc(ccc1OCCCOc1cccc(c1)C1SC(=O)NC1=O)OC1CCCC1	✓	✓
CCCc1cc(ccc1OCCCCOc1ccc(cc1)C1SC(=O)NC1=O)Oc1ccccc1	✓	✓
CCCc1cc(ccc1OCCCCOc1ccc2c(c1)OC(CC2)(C)C(=O)O)Oc1ccccc1	✓
CCCc1cc(ccc1OCCCCOc1ccc2c(c1)OC(CC2)C(=O)O)Oc1ccccc1	✓
CCCc1cc(ccc1OCCCCOc1ccc2c(c1)CCC(O2)(C)C(=O)O)Oc1ccccc1	✓
CCCc1cc(ccc1OCCCCOc1ccc2c(c1)CCC(O2)C(=O)O)Oc1ccccc1	✓
CCCc1cc(ccc1OCCCCOc1cccc(c1)[C@H]1SC(=O)NC1=O)Oc1ccccc1	✓	✓
CCCc1cc(ccc1OCCCCOc1cccc(c1)C1SC(=O)NC1=O)Oc1ccccc1	✓	✓
CCCc1cc(ccc1OCCCOc1ccc(cc1)[C@H]1SC(=O)NC1=O)Oc1ccccc1	✓	✓
CCCc1cc(ccc1OCCCOc1ccc(cc1)C1SC(=O)NC1=O)Oc1ccccc1	✓	✓
CCCc1cc(ccc1OCCCOc1ccc(cc1C)C1SC(=O)NC1=O)Oc1ccccc1	✓	✓
CCCc1cc(ccc1OCCCOc1ccc(cc1CCC)C1SC(=O)NC1=O)Oc1ccccc1	✓	✓
CCCc1cc(ccc1OCCCOc1ccc(cc1Cl)C1SC(=O)NC1=O)Oc1ccccc1	✓	✓
CCCc1cc(ccc1OCCCOc1ccc(cc1OC)C1SC(=O)NC1=O)Oc1ccccc1	✓	✓
CCCc1cc(ccc1OCCCOc1ccc2c(c1)OC(CC2)(C)C(=O)O)Oc1ccccc1	✓
CCCc1cc(ccc1OCCCOc1ccc2c(c1)OC(CC2)(CC(C)C)C(=O)O)Oc1ccccc1	✓
CCCc1cc(ccc1OCCCOc1ccc2c(c1)OC(CC2)(CC)C(=O)O)Oc1ccccc1	✓
CCCC1(CCc2c(O1)cc(cc2)OCCCOc1ccc(cc1CCC)Oc1ccccc1)C(=O)O	✓
CCCc1cc(ccc1OCCCOc1ccc2c(c1)OC(CC2)C(=O)O)Oc1ccccc1	✓
CCCc1cc(ccc1OCCCOc1ccc2c(c1)CCC(O2)(C)C(=O)O)Oc1ccccc1	✓
CCCc1cc(ccc1OCCCOc1ccc2c(c1)CCC(O2)C(=O)O)Oc1ccccc1	✓
CCCc1cc(ccc1OCCCOc1cccc(c1)[C@@H]1SC(=O)NC1=O)OC1CCCCC1	✓	✓
CCCc1cc(ccc1OCCCOc1cccc(c1)C1SC(=O)NC1=O)Oc1ccccc1	✓	✓				✓	✓	✓
CCCc1cc(ccc1OCCCOc1cccc(c1)[C@H]1SC(=O)NC1=O)OC1CCCCCC1	✓	✓
CCCc1cc(ccc1OCCCOc1cccc(c1)C1SC(=O)NC1=O)OC1CCCCCC1	✓	✓
CCCc1cc(ccc1OCCCOc1ccc2c(c1)CC(O2)(CC)C(=O)O)SC(F)(F)F	✓
CCCc1cc2c(c(c1O[C@@H](c1ccc(cc1)C(C)C)C(=O)O)CCC)on(c2=O)C	✓		✓
CCCc1cc2c(c(c1O[C@@H](c1ccccc1)C(=O)O)CCC)on(c2=O)C	✓		✓
CCCc1cc2c(c(c1O[C@@H](c1ccc(cc1)CC(C)C)C(=O)O)CCC)on(c2=O)C(C)C	✓		✓
CCCc1cc2c(c(c1O[C@@H](c1ccc(cc1)C(C)C)C(=O)O)CCC)on(c2=O)C(C)C	✓		✓
CCCc1cc2c(c(c1O[C@@H](c1ccc(cc1)C(C)C)C(=O)O)CCC)on(c2=O)C1CCCCC1	✓		✓
CCCc1cc2c(CC)noc2c(c1OC(c1ccccc1)C(=O)O)CCC						✓	✓		✓
CCCc1cc2c(c(c1O[C@H](c1ccccc1)C(=O)O)CCC)onc2C(F)(F)F						✓	✓		✓
CCCc1cc2c(c(c1O[C@@H](c1ccccc1)C(=O)O)CCC)onc2C(F)(F)F						✓	✓		✓
CCCc1cc2c(c(c1OC(c1ccc(cc1)C(C)C)C(=O)O)CCC)onc2C(F)(F)F						✓	✓		✓
CCCc1cc2c(c(c1OC(c1ccc(cc1)C(F)(F)F)C(=O)O)CCC)onc2C(F)(F)F						✓	✓		✓
CCCc1cc2c(c(c1OC(c1ccc(cc1)CCc1ccccn1)C(=O)O)CCC)onc2C(F)(F)F						✓	✓		✓
CCCc1cc2c(c(c1OC(c1ccc(cc1)Cl)C(=O)O)CCC)onc2C(F)(F)F						✓	✓		✓
CCCc1cc2c(c(c1OC(c1ccc(cc1)OCc1ccccn1)C(=O)O)CCC)onc2C(F)(F)F						✓	✓		✓
CCCc1cc2c(c(c1OC(c1ccccc1)C(=O)O)CCC)onc2C(F)(F)F						✓	✓		✓
CCCc1cc2c(c(c1OC(C(=O)O)(C)C)CCC)onc2C(F)(F)F	✓
CCCc1cc2c(OC)noc2c(c1OC(C(=O)O)(C)C)CCC	✓
CCCc1cc2c(n1Cc1ccc(cc1)c1ccccc1C(=O)O)ccc(c2)NC(=O)C(c1ccccc1)CC	✓
CCCc1cc2c(c(c1O[C@@H](c1ccc(cc1)C(C)C)C(=O)O)CCC)oc(=O)n2C(C)C	✓		✓
CCCc1cc2c(c(c1O[C@@H](c1ccccc1)C(=O)O)CCC)oc(=O)n2C(C)C	✓		✓
CCCc1cc2c(c(c1O[C@@H](c1ccc(cc1)C(C)C)C(=O)O)CCC)oc(=O)n2C	✓		✓
CCCc1cc2c(c(c1O[C@@H](c1ccc(cc1)C(C)C)C(=O)O)CCC)oc(=O)n2CC(F)(F)F	✓		✓
CCCc1cc2c(c(c1O[C@@H](c1ccc(cc1)C(C)C)C(=O)O)CCC)oc(=O)n2CC	✓		✓
CCCc1cc2c(c(c1O[C@@H](c1ccc(cc1)Cl)C(=O)O)CCC)oc(=O)n2CC	✓		✓
CCCc1cc2c(c(c1O[C@@H](c1ccc(cc1)C(C)C)C(=O)O)CCC)oc(=O)n2CC1CC1	✓		✓
CCCc1ccc(cc1)[C@@H](NC(=O)c1ccc2c(c1)c(C)c(n2Cc1ccc(cc1)c1ccccc1C(=O)O)C)C	✓
CCCc1ccc(cc1O[C@H](C(=O)O)C)Oc1c(C)n(c2c1cc(cc2)OC(F)(F)F)c1noc2c1ccc(c2)Cl	✓
CCCc1ccccc1OCCCOc1cccc(c1)C1OC(=O)NC1=O	✓
CCCc1nc2c(n1Cc1ccc(cc1)c1ccccc1C(=O)O)cc(cc2C)c1nc2c(n1C)cccc2	✓
CCCCC(=O)N(CCOc1ccc(cc1)CC1SC(=O)NC1=O)C						✓	✓	✓
CCCCC(C(=O)O)(Oc1ccccc1)Cc1ccc(cc1)OCCc1nc(oc1C)c1ccccc1	✓
CCCCN(S(=O)(=O)c1ccc(c(c1C)C)OC(C(=O)O)CCCC)c1cccc(c1C)c1ccc(cc1)Cl	✓
CCCCC/C(=C\CCCCCCCCCCC(=O)O)/[N+](=O)[O-]	✓
CCCCC/C=C(/[N+](=O)[O-])\C/C=C\CCCCCCCC(=O)O	✓
CCCCC/C=C(/[N+](=O)[O-])\CCCCCCCCCCC(=O)O	✓
CCCCC/C=C\C/C=C\C/C=C\C/C=C\CCCC(=O)O	✓
CCCCC/C=C\C/C=C\C/C=C\CCCCC(=O)O	✓
CCCCC/C=C\C/C=C\C/C=C\CCCCCCC(=O)O	✓
CCCCC/C=C\C/C=C\CCCCCCCC(=O)O	✓
CCCCC/C=C\C=C\C(CCCCCCCC(=O)O)O				✓
CCCCC/C=C/C/C=C\C/C=C\C/C=C\CCCC(=O)O						✓	✓
CCCCC/C=C/C=C/1\[C@@H](C/C=C\CCCC(=O)O)C=CC1=O				✓
CCCCCC(=O)N(CCOc1ccc(cc1)CC1SC(=O)NC1=O)C						✓	✓	✓
CCCCCC(=O)NCCOc1ccc(cc1)CC1SC(=O)NC1=O						✓	✓	✓
CCCCCC(/C=C\C=C/CCCCCCCC(=O)O)O				✓
CCCCCC/C(=C\CCCCCCCC(=O)O)/[N+](=O)[O-]	✓
CCCCCC/C=C(/[N+](=O)[O-])\CCCCCCCC(=O)O	✓
CCCCCC/C=C\CCCCCCCC(=O)O	✓
CCCCCc1cc(OC)c(c(c1C(=O)O)O)CC=C(C)C				✓
CCCCCCC(=O)N(CCOc1ccc(cc1)CC1SC(=O)NC1=O)C						✓	✓	✓
CCCCCCC(=O)NC[C@@H](Nc1ccccc1C(=O)c1ccccc1)Cc1ccc(cc1)OCCc1nc(oc1C)c1ccccc1						✓	✓
CCCCCCC(=O)NCCOc1ccc(cc1)CC1SC(=O)NC1=O						✓	✓	✓
CCCCCCC(C(=O)O)Sc1nc(Nc2ccc(cc2)c2ccc(cc2)C#N)cc(n1)Cl	✓
CCCCCCC(C(=O)O)Sc1nc(Nc2ccc3c(c2)cccn3)cc(n1)Cl	✓
CCCCCCC(C(=O)O)Sc1nc(Cl)cc(n1)Nc1cccc(c1C)C	✓
CCCCCCCC(=O)N(CCOc1ccc(cc1)CC1SC(=O)NC1=O)C						✓	✓	✓
CCCCCCCC(=O)NCCOc1ccc(cc1)CC1SC(=O)NC1=O						✓	✓	✓
CCCCCCCC/C(=C\CCCCCCCC(=O)O)/[N+](=O)[O-]	✓
CCCCCCCC/C=C(/[N+](=O)[O-])\CCCCCCCC(=O)O	✓
CCCCCCCC/C=C\CCCCCCCC(=O)O	✓
CCCCCCCC/C=C\CCCCCCCCCCCC(=O)O	✓
CCCCCCCc1oc2cc(O)ccc2c(=O)c1c1ccc(cc1)O	✓
CCCCCCCCC(=O)N(CCOc1ccc(cc1)CC1SC(=O)NC1=O)C						✓	✓	✓
CCCCCCCCC(=O)NCCOc1ccc(cc1)CC1SC(=O)NC1=O						✓	✓	✓
CCCCCCCCCC(=O)N(CCOc1ccc(cc1)CC1SC(=O)NC1=O)C						✓	✓	✓
CCCCCCCCCC(=O)NCCOc1ccc(cc1)CC1SC(=O)NC1=O						✓	✓	✓
CCCCCCCCCC(=O)O	✓
CCCCCCCCCCCC(=O)O	✓
CCCCCCCCCCCC/C(=C\CCCC(=O)O)/[N+](=O)[O-]	✓
CCCCCCCCCCCC/C=C(/[N+](=O)[O-])\CCCC(=O)O	✓
CCCCCCCCCCCCCC(=O)O	✓
CCCCCCCCCCCCCCCC(=O)O	✓
CCCCCCCCCCCCCCCCCC(=O)O	✓
CCCCCCCCCCCCCCCCCCCC(=O)O	✓
CCCCCCCCCCCCCCCCCCCCCC(=O)O	✓
CCCCCCCN(Cc1ccc(cc1)OCCc1nc(oc1C)c1ccccc1)CC(=O)O	✓
CCCCCCCN(C(=O)Nc1ccc(cc1F)F)CCc1ccc(cc1)O[C@](C(=O)O)(CC)C	✓
CCCCCCCN(c1nc2c(o1)cccc2)CCc1ccc(cc1)O[C@](C(=O)O)(CC)C				✓		✓	✓
CCCCCCCN(c1nc2c(o1)cccc2)CCc1ccc(cc1)O[C@@](C(=O)O)(CC)C				✓		✓	✓
CCCCCCCN(c1nc2c(o1)cccc2)CCc1ccc(cc1)OC(C(=O)O)(C)C				✓
CCCCCCCN(C(=O)Nc1ccc(cc1F)F)CCc1ccc(cc1)SC(C(=O)O)(C)C	✓
CCCCCCOC(C(=O)O)Cc1ccc(c2c1scc2)OCCc1nc(oc1C)c1ccccc1	✓
CCCCCN(S(=O)(=O)c1ccc(c(c1C)C)OC(C(=O)O)C)c1cccc(c1C)c1ccc(cc1)Cl	✓
CCCCCOc1cc2ccccc2cc1C(C/C=C/CCCC(=O)OC)O						✓	✓
CCCCCOc1cc2ccccc2cc1C(CC#CCCCC(=O)OC)O						✓	✓
CCCCCOc1cc2ccccc2cc1C(CCCCCCCC(=O)OC)O						✓	✓
CCCCCOc1ccccc1C(C/C=C\CCCC(=O)OC)O						✓	✓
CCCCCOc1ccccc1C(CC#CCCCC(=O)OC)O						✓	✓
CCCCCOc1ccccc1C(CCCCCCC(=O)OC)O						✓	✓
CCCCCOc1nc2ccccc2cc1C(C/C=C\CCCC(=O)OC)O						✓	✓
CCCCCS(=O)(=O)NC(=O)/C=C/c1cc(nn1Cc1ccc(cc1Cl)C(F)(F)F)C1CC1	✓
CCCCCS(=O)(=O)NC(=O)/C=C/c1cc(nn1Cc1ccc(cc1Cl)C(F)(F)F)OC(C)C	✓
CCCCCS(=O)(=O)NC(=O)/C=C/c1ccc(cc1Oc1ncc(cc1Cl)C(F)(F)F)OCCOC	✓
CCCCCS(=O)(=O)NC(=O)CCc1cc(nn1Cc1ccc(cc1Cl)C(F)(F)F)OC(C)C	✓
CCCCN(S(=O)(=O)c1ccc(c(c1C)C)OC(C(=O)O)C)c1c(C)cc(c(c1C)c1ccc(cc1)Cl)C	✓
CCCCN(S(=O)(=O)c1ccc(c(c1C)C)OC(C(=O)O)C)c1cc(c(cc1C)F)c1ccc(cc1)Cl	✓
CCCCN(S(=O)(=O)c1ccc(c(c1C)C)OC(C(=O)O)C)c1cc(c2ccc(cc2)Cl)c(cc1F)F	✓
CCCCN(S(=O)(=O)c1ccc(c(c1C)C)OC(C(=O)O)C)c1cc(cc(c1)C(F)(F)F)c1ccc(cc1)Cl	✓
CCCCN(S(=O)(=O)c1ccc(c(c1C)C)OC(C(=O)O)C)c1cc(ccc1C)c1ccc(cc1)Cl	✓
CCCCN(S(=O)(=O)c1ccc(c(c1C)C)OC(C(=O)O)C)c1cc(ccc1OC(F)(F)F)c1ccc(cc1)Cl	✓
CCCCN(S(=O)(=O)c1ccc(c(c1C)C)OC(C(=O)O)C)c1ccc(c(c1)c1ccc(cc1)Cl)C	✓
CCCCN(S(=O)(=O)c1ccc(c(c1C)C)OC(C(=O)O)C)c1ccc(c(c1)c1ccc(cc1)Cl)F	✓
CCCCN(S(=O)(=O)c1ccc(c(c1C)C)OC(C(=O)O)C)c1cccc(c1C)c1ccc(cc1)C	✓
CCCCN(S(=O)(=O)c1ccc(c(c1C)C)OC(C(=O)O)C)c1cccc(c1C)c1ccc(cc1)C(F)(F)F	✓
CCCCN(S(=O)(=O)c1ccc(c(c1C)C)OC(C(=O)O)C)c1cccc(c1C)c1ccc(c(c1)Cl)Cl	✓
CCCCN(S(=O)(=O)c1ccc(c(c1C)C)O[C@H](C(=O)O)C)c1cccc(c1C)c1ccc(cc1)Cl	✓
CCCCN(S(=O)(=O)c1ccc(c(c1C)C)O[C@@H](C(=O)O)C)c1cccc(c1C)c1ccc(cc1)Cl	✓
CCCCN(S(=O)(=O)c1ccc(c(c1C)C)OC(C(=O)O)C)c1cccc(c1C)c1ccc(cc1)Cl	✓
CCCCN(S(=O)(=O)c1ccc(c(c1)C1CCCCC1)OC(C(=O)O)C)c1cccc(c1C)c1ccc(cc1)Cl	✓
CCCCN(S(=O)(=O)c1ccc(c(c1Cl)Cl)OC(C(=O)O)C)c1cccc(c1C)c1ccc(cc1)Cl	✓
CCCCN(S(=O)(=O)c1ccc(c(c1Cl)F)OC(C(=O)O)C)c1cccc(c1C)c1ccc(cc1)Cl	✓
CCCCN(S(=O)(=O)c1ccc(c(c1F)F)OC(C(=O)O)C)c1cccc(c1C)c1ccc(cc1)Cl	✓
CCCCN(S(=O)(=O)c1ccc(c(c1OC)F)OC(C(=O)O)C)c1cccc(c1C)c1ccc(cc1)Cl	✓
CCCCN(S(=O)(=O)c1ccc(c(c1Cl)OC)OC(C(=O)O)C)c1cccc(c1C)c1ccc(cc1)Cl	✓
CCCCN(S(=O)(=O)c1ccc(c(c1OC)OC)OC(C(=O)O)C)c1cccc(c1C)c1ccc(cc1)Cl	✓
CCCCN(S(=O)(=O)c1ccc(c(c1C)C)OC(C(=O)O)CC)c1cccc(c1C)c1ccc(cc1)Cl	✓
CCCCN(S(=O)(=O)c1ccc(c(c1C)C)OC(C(=O)O)CCC)c1cccc(c1C)c1ccc(cc1)Cl	✓
CCCCN(S(=O)(=O)c1ccc(c(c1C)C)OCC(=O)O)c1cccc(c1C)c1ccc(cc1)Cl	✓
CCCCN(S(=O)(=O)c1ccc(c(c1C)C)OC(C(=O)O)C)c1cccc(c1C)c1ccc(cc1)OC(F)(F)F	✓
CCCCN(S(=O)(=O)c1ccc(c(c1C)C)OC(C(=O)O)C)c1cccc(c1C)c1ccc(cc1)OC	✓
CCCCN(S(=O)(=O)c1ccc(c(c1C)C)OC(C(=O)O)C)c1cccc(c1C)c1cccc(c1)Cl	✓
CCCCN(S(=O)(=O)c1ccc(c(c1C)C)OC(C(=O)O)C)c1cccc(c1C)c1ccccc1Cl	✓
CCCCN(S(=O)(=O)c1ccc(c(c1C)C)OC(C(=O)O)C)c1cccc(c1Cl)c1ccc(cc1)C(F)(F)F	✓
CCCCN(S(=O)(=O)c1ccc(c(c1C)C)OC(C(=O)O)C)c1cccc(c1Cl)c1ccc(cc1)Cl	✓
CCCCN(S(=O)(=O)c1ccc(c(c1C)C)OC(C(=O)O)C)c1cccc(c1Cl)c1ccc(cc1)OC(F)(F)F	✓
CCCCN(S(=O)(=O)c1ccc(c(c1C)C)OC(C(=O)O)C)c1cccc(c1OC)c1ccc(cc1)Cl	✓
CCCCNC(=O)NS(=O)(=O)c1ccc(cc1)NC(=O)Cn1c(=O)c(C)nc2c1cccc2	✓
CCCCNC(=O)NS(=O)(=O)c1ccc(cc1)NC(=O)CN1CC(=O)Nc2c1cccc2	✓
CCCCNC(=O)NS(=O)(=O)c1ccc(cc1)NCC(=O)N1CC(=O)Nc2c1cccc2	✓
CCCCNC(=S)NS(=O)(=O)c1ccc(cc1)NC(=O)Cn1c(=O)c(C)nc2c1cccc2	✓
CCCCOc1ccc(cc1CNC(=O)c1ccc(cc1F)C(F)(F)F)c1ccc(cc1C)C(=O)O	✓
CCCN(S(=O)(=O)c1ccc(c(c1C)C)OC(C(=O)O)C)c1cccc(c1C)c1ccc(cc1)Cl	✓
CCCN[C@H](C(=O)O)Cc1ccc(cc1)OCCc1nc(oc1C)c1ccccc1						✓	✓
CCCn1c(CCCc2ccc(cc2)OC(C(=O)O)(C)C)nn(c1=O)[C@@H](c1ccccc1)C	✓
CCCn1c(CCCc2ccc(cc2)OC(C(=O)O)(C)C)nn(c1=O)C(c1ccccc1)C	✓
CCCn1c(CCCc2ccc(cc2)OC(C(=O)O)(C)C)nn(c1=O)Cc1ccc(cc1)C	✓
CCCn1c(CCCc2ccc(cc2)OC(C(=O)O)(C)C)nn(c1=O)Cc1cccc(c1)OC	✓
CCCn1c(CCCc2ccc(cc2)OC(C(=O)O)(C)C)nn(c1=O)CC1CCCCC1	✓
CCCc1cc2c(c(c1O[C@@H](c1ccc(cc1)C(C)C)C(=O)O)CCC)oc(=O)n2CCC	✓		✓
CCCO[C@H](C(=O)O)Cc1ccc(c2c1scc2)OCCc1nc(oc1C)c1ccccc1	✓
CCCO[C@@H](C(=O)O)Cc1ccc2c(c1)ccn2Cc1nc(oc1C)c1ccc(cc1)C(F)(F)F	✓
CCCOC(=O)c1ccccc1NC(C(=O)O)Cc1ccc(cc1)OCCc1nc(oc1C)c1ccccc1						✓	✓
CCCOC(=O)N(Cc1cccc(c1)OCc1nc(oc1C)c1ccc(cc1)Cl)CC(=O)O	✓
CCCOC(=O)N1CCC(=C(C1)Cc1cccc(c1)OCCc1nc(oc1C)c1ccccc1)C(=O)O	✓
CCCOC(=O)N1CCC(C(=C1)Cc1cccc(c1)OCCc1nc(oc1C)c1ccccc1)C(=O)O	✓
CCCOC(=O)N1CCc2c(C1)c(CCC(=O)O)ccc2OCCc1nc(oc1C)c1ccc(cc1)c1ccccc1	✓
CCCOC(=O)N1CCc2c(C1)c(CCC(=O)O)ccc2OCCc1nc(oc1C)c1ccccc1	✓
CCCOC(C(=O)O)Cc1ccc(c2c1cccc2)OCCc1nc(oc1C)c1ccccc1	✓
CCCOC(C(=O)O)Cc1ccc(c2c1scc2)OCCc1nc(oc1C)c1ccccc1	✓
CCCOC(C(=O)O)Cc1ccc2c(c1)ccn2Cc1nc(oc1C)c1ccc(cc1)C(F)(F)F	✓
CCCOc1ccc(cc1CNC(=O)c1ccc(cc1)N1C2CC3CC1CC(C2)C3)C[C@H](C(=O)O)Cc1ccccc1				✓
CCCOc1ccc(cc1CNC(=O)c1ccc(cc1)N1C2CCCC1CC2)C[C@H](C(=O)O)Cc1ccccc1				✓
CCCOc1ccc(cc1CNC(=O)c1ccc(cc1)N1C2CCCC1CCC2)C[C@H](C(=O)O)Cc1ccccc1				✓
CCCOc1ccc(cc1CNC(=O)c1ccc(cc1)N1CC(C)(C)CC(C1)(C)C)C[C@H](C(=O)O)Cc1ccccc1				✓
CCCOc1ccc(cc1CNC(=O)c1ccc(cc1)N1CC2CCC(C1)C2)C[C@H](C(=O)O)Cc1ccccc1				✓
CCCOc1ccc(cc1CNC(=O)c1ccc(cc1)N1CCCCC1)C[C@H](C(=O)O)Cc1ccccc1				✓
CCCOc1ccc(cc1CNC(=O)c1ccc(cc1)N1CCCCCCC1)C[C@H](C(=O)O)Cc1ccccc1				✓
CCCOc1ccc(cc1CNC(=O)c1ccc(cc1)N1CCCCCCCC1)C[C@H](C(=O)O)Cc1ccccc1				✓
CCN(C(=O)c1cccc(c1)CN(C(=O)c1ccccc1)CC)Cc1ccc(cc1)CCC(=O)O	✓
CCN(c1cccc(c1)C)CCOc1ccc(cc1)C[C@@H](C(=O)O)Nc1ccccc1C(=O)c1ccccc1						✓	✓
CCn1c(CCCc2ccc(cc2)c2ccc(cn2)NS(=O)(=O)c2ccccc2)nn(c1=O)Cc1ccc(cc1)C(C)(C)C	✓
CCn1c(cc2c1cccc2)C(=O)NS(=O)(=O)c1cccc(c1)C(F)(F)F	✓
COc1cccc2c1oc(c2)c1nnc(n1CC)SCC(=O)Nc1ccc(cc1)C(=O)O	✓
CCNC(=O)c1cc(ccc1Oc1cncc(c1)Cl)NS(=O)(=O)c1cc(C)c(cc1Cl)Cl	✓
CCNC(=O)c1cc(ccc1Oc1cncc(c1)Cl)NS(=O)(=O)c1ccc(cc1OC(F)(F)F)Br	✓
CCNC(=O)c1cc(ccc1Oc1cncc(c1)Cl)NS(=O)(=O)c1ccc(cc1)[N+](=O)[O-]	✓
CCNC(=O)c1cc(ccc1Oc1cncc(c1)Cl)NS(=O)(=O)c1ccc(cc1Cl)C(F)(F)F	✓
CCNC(=O)c1cc(ccc1Oc1cncc(c1)Cl)NS(=O)(=O)c1ccc(c(c1)Cl)Cl	✓
CCNC(=O)c1cc(ccc1Oc1cncc(c1)Cl)NS(=O)(=O)c1ccc(cc1)Cl	✓
CCNC(=O)c1cc(ccc1Oc1cncc(c1)Cl)NS(=O)(=O)c1ccc(cc1Cl)Cl	✓
CCNC(=O)c1cc(ccc1Oc1cncc(c1)Cl)NS(=O)(=O)c1ccc(cc1)I	✓
CCNC(=O)c1cc(ccc1Oc1cncc(c1)Cl)NS(=O)(=O)c1ccc(cc1)OC	✓
CCO[C@H](C(=O)O)Cc1ccc(cc1)OCC=C(c1ccc(cc1)c1ccccc1)c1ccc(cc1)c1ccccc1				✓
CCO[C@H](C(=O)O)Cc1ccc(cc1)OCC=C(c1ccccc1)c1ccccc1				✓
CCO[C@H](C(=O)O)Cc1ccc(cc1)OCCc1ccc(cc1)OS(=O)(=O)C	✓					✓	✓
CCO[C@H](C(=O)O)Cc1ccc(c2c1cccc2)OCCc1nc(oc1C)c1ccc(cc1)C(F)(F)F	✓
CCO[C@H](C(=O)O)Cc1ccc(c2c1scc2)OCCc1nc(oc1C)c1ccc(cc1)C(F)(F)F	✓
CCO[C@H](C(=O)O)Cc1ccc(c2c1scc2)OCCc1nc(oc1C)c1ccc(cc1)c1ccccc1	✓
CCO[C@H](C(=O)O)Cc1ccc(c2c1cccc2)OCCc1nc(oc1C)c1ccccc1	✓
CCO[C@H](C(=O)O)Cc1ccc(c2c1scc2)OCCc1nc(oc1C)c1ccccc1	✓
CCO[C@H](C(=O)O)Cc1ccc(c2c1ccs2)OCCc1nc(oc1C)c1ccccc1	✓
CCO[C@H](C(=O)O)Cc1ccc(cc1)OCCCOc1ccc(cc1)Oc1ccccc1	✓
CCO[C@H](C(=O)O)Cc1ccc(cc1)OCCn1c2ccccc2c2c1cccc2				✓
CCO[C@H](C(=O)O)Cc1ccc(cc1)OCCN1c2ccccc2Oc2c1cccc2	✓					✓	✓
CCO[C@H](C(=O)O)Cc1ccc(cc1)OCCN1CCC(c2c1ccc(c2)/C(=N\OC)/c1ccccc1)(C)C						✓	✓
CCO[C@H](C(=O)OCC)Cc1ccc(cc1)OCCN1CCC(c2c1ccc(c2)/C(=N\OC)/c1ccccc1)(C)C						✓	✓
CCO[C@H](C(=O)O)Cc1ccc(cc1)OCCN1CCC(c2c1ccc(c2)/C(=N/OC)/c1ccccc1)(C)C						✓	✓
C=CCO/N=C(\c1ccccc1)/c1ccc2c(c1)C(C)(C)CCN2CCOc1ccc(cc1)C[C@@H](C(=O)O)OCC						✓	✓
CCO[C@H](C(=O)O)Cc1ccc(cc1)OCCN1CCC(c2c1ccc(c2)/C(=N/OCC1CC1)/c1ccccc1)(C)C						✓	✓
CCO[C@H](C(=O)O)Cc1ccc(cc1)OCCN1CCC(c2c1ccc(c2)/C(=N/OCc1ccccc1)/c1ccccc1)(C)C						✓	✓
CCO[C@H](C(=O)O)Cc1cccc2c1ccn2Cc1nc(oc1C)c1ccccc1	✓
CCO[C@@H](C(=O)O)Cc1ccc(c2c1scc2)OCCc1nc(oc1C)c1ccccc1	✓
CCO[C@@H](C(=O)O)Cc1ccc(cc1)OCCN1CCC(c2c1ccc(c2)/C(=N\OC)/c1ccccc1)(C)C						✓	✓
CCO[C@@H](C(=O)O)Cc1ccc2c(c1)cc(n2Cc1nc(oc1C)c1ccc(cc1)C(F)(F)F)C	✓
CCOC(=O)C[C@@H](NC(=O)c1csc(n1)C1CCN(CC1)C(=O)c1c(F)cccc1Cl)C	✓
CCOC(=O)c1cc(ccc1Oc1cncc(c1)Cl)NS(=O)(=O)c1ccc(cc1)Cl	✓
CCOC(=O)c1ccc(cc1)OS(=O)(=O)/C=C/c1ccccc1	✓
CCOC(=O)c1ccccc1NC(C(=O)O)Cc1ccc(cc1)OCCc1nc(oc1C)c1ccccc1						✓	✓
CCOC(=O)N1C[C@H]([C@H](C1)C(=O)O)Cc1ccc(cc1)OCCc1nc(oc1C)c1ccccc1	✓
CCOC(=O)N1C[C@H]([C@H](C1)CC(=O)O)Cc1cccc(c1)OCCc1nc(oc1C)c1ccccc1	✓
CCOC(=O)N1C[C@H]([C@H](C1)C(=O)O)Cc1cccc(c1)OCCc1nc(oc1C)c1ccccc1	✓
CCOC(=O)N1C[C@H]([C@H](C1)C(=O)O)CCc1ccc(cc1)OCCc1nc(oc1C)c1ccccc1	✓
CCOC(=O)N1C[C@H]([C@H](C1)C(=O)O)CCc1cccc(c1)OCCc1nc(oc1C)c1ccccc1	✓
CCOC(=O)N1C[C@H]([C@H](C1)CC(=O)O)c1cccc(c1)OCCc1nc(oc1C)c1ccccc1	✓
CCOC(=O)N1C[C@@H]([C@H](C1)CC(=O)O)Cc1cccc(c1)OCCc1nc(oc1C)c1ccccc1	✓
CCOC(=O)N1C[C@@H]([C@H](C1)CC(=O)O)c1cccc(c1)OCCc1nc(oc1C)c1ccccc1	✓
CCOC(=O)N1C[C@@H]([C@@H](C1)C(=O)O)Cc1cccc(c1)OCCc1nc(oc1C)c1ccccc1	✓
CCOC(=O)N1C[C@@H]([C@H](C1)C(=O)O)Cc1cccc(c1)OCCc1nc(oc1C)c1ccccc1	✓
CCOC(=O)N1C[C@@H]([C@H](C1)C(=O)O)CCc1ccc(cc1)OCCc1nc(oc1C)c1ccccc1	✓
CCOC(C(=O)O)(Cc1ccc(nc1)OCCc1nc(oc1C)c1ccccc1)CC						✓	✓
CCOC(C(=O)O)Cc1ccc(c2c1cccc2)OCCc1nc(oc1C)c1ccccc1	✓
CCOC(C(=O)O)Cc1ccc(c2c1scc2)OCCc1nc(oc1C)c1ccccc1	✓
CCOC(C(=O)O)Cc1ccc(cn1)OCCc1nc(oc1C)c1ccccc1						✓	✓
CCOC(C(=O)O)Cc1ccc(nc1)OCCc1nc(oc1C)c1ccccc1						✓	✓
CCOC(C(=O)O)Cc1ccc(cn1)OCCCc1nc(oc1C)c1ccccc1						✓	✓
CCOC(C(=O)O)Cc1ccc(cc1)OCCN(C1=Nc2ccccc2Sc2c1cccc2)C				✓
CCOC(C(=O)O)Cc1ccc(cc1)OCCN(c1nc2c(o1)cccc2)C						✓	✓
CCOC(C(=O)OCC)Cc1ccc(cc1)OCCN1CCC(c2c1ccc(c2)/C(=N\O)/c1ccccc1)(C)C						✓	✓
CCOC(C(=O)O)Cc1ccc(cc1)OCCN1CCC(c2c1ccc(c2)/C(=N\OC)/c1ccccc1)(C)C						✓	✓
CCOC(C(=O)OCC)Cc1ccc(cc1)OCCN1CCC(c2c1ccc(c2)/C(=N\OC)/c1ccccc1)(C)C						✓	✓
CCOC(C(=O)O)Cc1ccc2c(c1)c(C)cn2Cc1nc(oc1C)c1ccc(cc1)C(F)(F)F	✓
CCOC(C(=O)O)Cc1ccc2c(c1)cc(n2Cc1nc(oc1C)c1ccc(cc1)C(F)(F)F)C	✓
CCOC(C(=O)O)Cc1ccc2c(c1)ccn2Cc1nc(oc1C)c1cc(C)cc(c1)C	✓
CCOC(C(=O)O)Cc1ccc2c(c1)ccn2Cc1nc(oc1C)c1cc(Cl)cc(c1)Cl	✓
CCOC(C(=O)O)Cc1ccc2c(c1)ccn2Cc1nc(oc1C)c1cc(OC)cc(c1)OC	✓
CCOC(C(=O)O)Cc1ccc2c(c1)ccn2Cc1nc(oc1C)c1ccc(cc1)CC	✓
CCOC(C(=O)O)Cc1ccc2c(c1)ccn2Cc1nc(oc1C)c1ccc(cc1)C(C)(C)C	✓
CCOC(C(=O)O)Cc1ccc2c(c1)ccn2Cc1nc(oc1C)c1ccc(cc1)C(C)C	✓
CCOC(C(=O)O)Cc1ccc2c(c1)ccn2Cc1nc(oc1C)c1ccc(cc1)C(F)(F)F	✓
CCOC(C(=O)O)Cc1ccc2c(c1)ccn2Cc1nc(oc1C)c1ccc(c(c1)C)F	✓
CCOC(C(=O)O)Cc1ccc2c(c1)ccn2Cc1nc(oc1C)c1ccc(cc1)F	✓
CCOC(C(=O)O)Cc1ccc2c(c1)ccn2Cc1nc(oc1C)c1cccc(c1)Cl	✓
CCOC(C(=O)O)Cc1ccc2c(c1)ccn2Cc1nc(oc1C)c1ccccc1	✓
CCOC(C(=O)O)Cc1ccc2c(c1)ccn2Cc1nc(oc1C)c1ccccc1C	✓
CCOC(C(=O)O)Cc1ccc2c(c1)ccn2Cc1nc(oc1C)c1ccccc1Cl	✓
CCOC(C(=O)O)Cc1ccc2c(c1)ccn2Cc1nc(oc1C)c1ccccc1F	✓
CCOC(C(=O)O)Cc1ccc2c(c1)ccn2Cc1nc(oc1C)c1ccccc1OC(C)C	✓
CCOC(C(=O)O)Cc1ccc2c(c1)ccn2Cc1nc(oc1C)c1ccccc1OC	✓
CCOC(C(=O)O)Cc1cccc2c1ccn2Cc1nc(oc1C)c1ccccc1	✓
CCOC(C(=O)O)Cc1cccc2c1ccn2CCCc1nc(oc1C)c1ccccc1	✓
CCOc1ccc(cc1)[C@@H](NC(=O)c1ccc2c(c1)c(C)c(n2Cc1ccc(cc1)c1ccccc1C(=O)O)C)C	✓
CCOc1ccc2c(c1)c(Oc1cccc(c1)C(F)(F)F)c(n2c1ccc(cc1)C(C)(C)C)C(=O)O	✓
CCOc1cccc(c1)[C@@H](NC(=O)c1ccc2c(c1)c(C)c(n2Cc1ccc(cc1)c1ccccc1)C)C	✓
CCOc1cccc(c1)Oc1c2ccccc2n(c1C(=O)O)c1ccc(cc1)C(C)(C)C	✓
Clc1cc(Cl)c(c(c1)Cl)OS(=O)(=O)/C=C/c1ccccc1	✓
Clc1ccc(c(c1)Cl)S(=O)(=O)Nc1cc(Cl)c(c(c1)Cl)Oc1ccc2c(c1)cccn2	✓
Clc1ccc(c(c1)Cl)S(=O)(=O)Nc1cc(Cl)c(c(c1)Cl)Oc1cnc2c(c1)cccc2	✓
N#Cc1cncc(c1)Oc1c(Cl)cc(cc1Cl)NS(=O)(=O)c1ccc(cc1Cl)Cl	✓
Clc1ccc(c(c1)Cl)S(=O)(=O)Nc1cc(Cl)c(c(c1)Cl)Oc1cncc(c1)Cl	✓
Clc1ccc(c(c1)Cl)S(=O)(=O)Nc1ccc(c(c1)Cl)Oc1ccc2c(c1)cccc2	✓
Clc1ccc(c(c1)Cl)S(=O)(=O)Nc1ccc(c(c1)Cl)Oc1cnc2c(c1)cccc2	✓
N#Cc1cc(ccc1Oc1cncc(c1)Cl)NS(=O)(=O)c1ccc(cc1Cl)Cl	✓
Clc1ccc(c(c1)Cl)S(=O)(=O)Nc1ccc(c(c1)Cl)Oc1cncc(c1)Cl	✓
Clc1ccc(c(c1)Cl)S(=O)(=O)Nc1ccc(cc1)Oc1cncc(c1)Cl	✓
Clc1ccc(cc1)OS(=O)(=O)/C=C/c1ccccc1	✓
Clc1cccc(c1)CN1C(=O)S/C(=C\c2ccc(cc2)c2ccccc2)/C1=O						✓	✓	✓
CN([C@H](C(=O)O)Cc1ccc(cc1)OCCc1nc(oc1C)c1ccccc1)C						✓	✓
O=C(c1ccc2c(c1)c(Oc1c(Cl)cccc1C(F)(F)F)nn2c1ccc(cc1)C(=O)O)N(C)C				✓
OC(=O)C(Nc1ccccc1C(=O)N(C)C)Cc1ccc(cc1)OCCc1nc(oc1C)c1ccccc1						✓	✓
CN(c1ccc(cc1)CCOc1ccc(cc1)C[C@@H](C(=O)O)Nc1ccccc1C(=O)c1ccccc1)C						✓	✓
O=C(c1ccc2c(c1)c(C)c(n2Cc1ccc(cc1)c1ccccc1C(=O)O)C)NCc1ccc(cc1)N(C)C	✓
OC(=O)[C@@H](Nc1ccccc1C(=O)c1ccccc1)Cc1ccc(cc1)OCCc1nc(sc1C)N(C)C						✓	✓
CN(Cc1ccc(cc1)C(=O)c1ccccc1NC(C(=O)O)Cc1ccc(cc1)OCCc1nc(oc1C)c1ccccc1)C						✓	✓
CN(Cc1cccc(c1)C(=O)c1ccccc1NC(C(=O)O)Cc1ccc(cc1)OCCc1nc(oc1C)c1ccccc1)C						✓	✓
CN(CCCNc1sc(c(n1)CCOc1ccc(cc1)C[C@@H](C(=O)O)Nc1ccccc1C(=O)c1ccccc1)C)C						✓	✓
CN(CCOc1cccc(c1)C(=O)NC[C@@H](Nc1ccccc1C(=O)c1ccccc1)Cc1ccc(cc1)OCCc1nc(oc1C)c1ccccc1)C	✓					✓	✓
OC(=O)[C@@H](n1cccc1)Cc1ccc(cc1)/C=C/CN(c1ccccc1)C	✓
OC(=O)[C@@H](n1cccc1)Cc1ccc(cc1)/C=C/CN(c1ccccn1)C	✓
OC(=O)[C@@H](n1cccc1)Cc1ccc(cc1)C#CCN(c1ccccc1)C	✓
OC(=O)C(n1cccc1)Cc1ccc(cc1)C#CCN(c1ccccn1)C	✓
Fc1cccc(c1)CN(C(=O)c1cnc(s1)c1ccc(c(c1)[N+](=O)[O-])S(=O)(=O)C)C	✓
CN(C(=O)c1ccc2c(c1)c(C)c(n2Cc1ccc(cc1)c1ccccc1C(=O)O)C)Cc1ccccc1	✓
OC(=O)[C@@H](n1cccc1)Cc1ccc(cc1)CCCN(c1ccccc1)C	✓
OC(=O)[C@@H](n1cccc1)Cc1ccc(cc1)CCCN(c1ccccn1)C	✓
OC(=O)[C@H](Nc1ccccc1C(=O)C1CCCCC1)Cc1ccc(cc1)OCCN(c1nc2c(o1)cccc2)C						✓	✓
O=C1NC(=O)[C@@H](S1)Cc1ccc(cc1)OCCN(c1ccccn1)C	✓	✓
OC(=O)[C@@H](Nc1ccccc1C(=O)c1ccccc1)Cc1ccc(cc1)OCCN(c1ccccn1)C						✓
OC(=O)[C@@H](Nc1ccccc1C(=O)c1ccccc1)Cc1ccc(cc1)OCCN(c1nc2c(o1)cccc2)C						✓	✓
OC(=O)[C@@H](Nc1ccccc1Oc1ccccc1)Cc1ccc(cc1)OCCN(c1nc2c(o1)cccc2)C						✓
O=C1NC(=O)[C@H](S1)Cc1ccc(cc1)OCCN(c1ccccn1)C	✓	✓
OC(=O)C(Cc1ccccc1C(=O)c1ccccc1)Cc1ccc(cc1)OCCN(c1nc2c(o1)cccc2)C						✓
OC(=O)C(Cc1ccc(cc1)OCCN(c1nc2c(o1)cccc2)C)CCCc1ccccc1						✓	✓
OC(=O)C(Cc1ccc(cc1)OCCN(c1nc2c(o1)cccc2)C)Cl						✓	✓
Cc1ccc(c(c1)C(=O)c1ccccc1)NC(C(=O)O)Cc1ccc(cc1)OCCN(c1nc2c(o1)cccc2)C						✓	✓
Clc1ccc(c(c1)C(=O)c1ccccc1)NC(C(=O)O)Cc1ccc(cc1)OCCN(c1nc2c(o1)cccc2)C						✓	✓
OC(=O)C(Nc1cccc2c1C(=O)c1ccccc1C2=O)Cc1ccc(cc1)OCCN(c1nc2c(o1)cccc2)C						✓
OC(=O)C(Nc1cccc2c1C(=O)c1c2cccc1)Cc1ccc(cc1)OCCN(c1nc2c(o1)cccc2)C						✓
N/N=C(/c1ccccc1NC(C(=O)O)Cc1ccc(cc1)OCCN(c1ccccn1)C)\c1ccccc1						✓
Cc1ccc(cc1)C(=O)c1ccccc1NC(C(=O)O)Cc1ccc(cc1)OCCN(c1nc2c(o1)cccc2)C						✓	✓
OC(=O)C(Nc1ccccc1C(=O)c1ccc(cc1)C(F)(F)F)Cc1ccc(cc1)OCCN(c1nc2c(o1)cccc2)C						✓	✓
OC(=O)C(Nc1ccccc1C(=O)c1ccc(cc1)c1ccccc1)Cc1ccc(cc1)OCCN(c1nc2c(o1)cccc2)C						✓	✓
OC(=O)C(Nc1ccccc1C(=O)c1ccc(cc1)OCc1ccccc1)Cc1ccc(cc1)OCCN(c1nc2c(o1)cccc2)C						✓	✓
Cc1cccc(c1)C(=O)c1ccccc1NC(C(=O)O)Cc1ccc(cc1)OCCN(c1nc2c(o1)cccc2)C						✓	✓
OC(=O)C(Nc1ccccc1C(=O)c1cccc(c1)C(F)(F)F)Cc1ccc(cc1)OCCN(c1nc2c(o1)cccc2)C						✓	✓
OC(=O)C(Nc1ccccc1C(=O)c1cccc(c1)OCc1ccccc1)Cc1ccc(cc1)OCCN(c1nc2c(o1)cccc2)C						✓	✓
OC(=O)C(Nc1ccccc1C(=O)C1CCCC1)Cc1ccc(cc1)OCCN(c1nc2c(o1)cccc2)C						✓	✓
OC(=O)C(Nc1ccccc1C(=O)c1cccc2c1cccc2)Cc1ccc(cc1)OCCN(c1nc2c(o1)cccc2)C						✓	✓
OC(=O)C(Nc1ccccc1C(=O)c1ccccc1)Cc1ccc(cc1)OCCN(c1nc2c(o1)cccc2)C						✓	✓
OC(=O)C(Nc1ccccc1C(=O)c1ccccc1C(F)(F)F)Cc1ccc(cc1)OCCN(c1nc2c(o1)cccc2)C						✓	✓
OC(=O)C(Nc1ccccc1C(=O)c1ccccc1C)Cc1ccc(cc1)OCCN(c1nc2c(o1)cccc2)C						✓	✓
OC(=O)C(Nc1ccccc1C(=O)C1CCCCCC1)Cc1ccc(cc1)OCCN(c1nc2c(o1)cccc2)C						✓	✓
OC(=O)C(Nc1ccccc1C(=O)c1cccs1)Cc1ccc(cc1)OCCN(c1nc2c(o1)cccc2)C						✓	✓
OC(=O)C(Nc1ccccc1C(=O)c1cscc1)Cc1ccc(cc1)OCCN(c1nc2c(o1)cccc2)C						✓	✓
OC(=O)C(Nc1ccccc1C(=O)Cc1ccccc1)Cc1ccc(cc1)OCCN(c1nc2c(o1)cccc2)C						✓
OC(=O)C(Nc1ccccc1Oc1ccccc1)Cc1ccc(cc1)OCCN(c1nc2c(o1)cccc2)C						✓	✓
OC(=O)C(Nc1ccccc1S(=O)(=O)c1ccccc1)Cc1ccc(cc1)OCCN(c1nc2c(o1)cccc2)C						✓
OC(=O)C(Nc1ccncc1C(=O)c1ccccc1)Cc1ccc(cc1)OCCN(c1nc2c(o1)cccc2)C						✓	✓
OC(=O)C(Nc1ccsc1C(=O)c1ccccc1)Cc1ccc(cc1)OCCN(c1nc2c(o1)cccc2)C						✓	✓
OC(=O)C(Nc1cscc1C(=O)c1ccccc1)Cc1ccc(cc1)OCCN(c1nc2c(o1)cccc2)C						✓	✓
OC(=O)C(Nc1sccc1C(=O)c1ccccc1)Cc1ccc(cc1)OCCN(c1nc2c(o1)cccc2)C						✓	✓
OC(=O)C(Cc1ccc(cc1)OCCN(c1nc2c(o1)cccc2)C)NCc1ccccc1C(=O)c1ccccc1						✓	✓
OC(=O)C(Oc1ccccc1)Cc1ccc(cc1)OCCN(c1nc2c(o1)cccc2)C						✓	✓
OC(=O)C(Oc1ccccc1C(=O)c1ccccc1)Cc1ccc(cc1)OCCN(c1nc2c(o1)cccc2)C						✓
OC(=O)C(Sc1ccccc1)Cc1ccc(cc1)OCCN(c1nc2c(o1)cccc2)C						✓	✓
OC(=O)C(Sc1ccccc1C(=O)c1ccccc1)Cc1ccc(cc1)OCCN(c1nc2c(o1)cccc2)C						✓
C=CCC/C=C/C(=O)N(CCOc1ccc(cc1)CC1SC(=O)NC1=O)C						✓	✓	✓
C=CCCC(=O)N(CCOc1ccc(cc1)CC1SC(=O)NC1=O)C						✓	✓	✓
O=C1NC(=O)C(S1)Cc1ccc(cc1)OCCN(c1ccccn1)C	✓	✓		✓		✓	✓	✓
O=C1NC(=O)C(S1)Cc1ccc(cc1)OCCN(c1nc2c(o1)cccc2)C						✓	✓	✓
CN[C@H](C(=O)O)Cc1ccc(cc1)OCCc1nc(oc1C)c1ccccc1						✓	✓
OC(=O)C(Oc1ccc(cc1)CCCc1nn(c(=O)n1C)Cc1ccc(c(c1)C)C)(C)C	✓
OC(=O)C(Oc1ccc(cc1)CCCc1nn(c(=O)n1C)Cc1ccc(cc1)C(C)(C)C)(C)C	✓
OC(=O)Cc1ccc2c(c1)c(CCc1ccccc1)c(n2C)c1ccccc1						✓	✓		✓
OC(=O)COc1ccc2c(c1)c(CCc1ccccc1)c(n2C)c1ccccc1						✓	✓
OC(=O)[C@@H](Nc1ccccc1C(=O)c1ccccc1)Cc1ccc(cc1)OCCc1nc(cn1C)c1ccccc1						✓	✓
CN1CCN(CC1)c1sc(c(n1)CCOc1ccc(cc1)C[C@@H](C(=O)O)Nc1ccccc1C(=O)c1ccccc1)C						✓	✓
CNC(=O)c1ccccc1c1ccc(cc1)Cn1c(C)c(c2c1ccc(c2)C(=O)N[C@H](c1cccc(c1)C(C)C)C)C	✓
CNC(=O)c1ccccc1NC(C(=O)O)Cc1ccc(cc1)OCCc1nc(oc1C)c1ccccc1						✓	✓
CO[C@](C(=O)O)(Cc1ccc(nc1)OCCc1nc(oc1C)c1ccccc1)C						✓	✓
CO[C@H](C(=O)O)Cc1ccc(cc1)C#CCCCOc1ccc(cc1)Oc1ccccc1	✓
CO[C@H](C(=O)O)Cc1ccc(cc1)C#CCCOc1ccc(cc1)Oc1ccccc1	✓
CO[C@H](C(=O)O)Cc1ccc(c2c1scc2)OCCc1nc(oc1C)c1cc(C)cc(c1)C	✓
COc1cc(OC)cc(c1)c1nc(c(o1)C)CCOc1ccc(c2c1ccs2)C[C@@H](C(=O)O)OC	✓
CO[C@H](C(=O)O)Cc1ccc(c2c1scc2)OCCc1nc(oc1C)c1ccc(cc1)C(C)C	✓
CO[C@H](C(=O)O)Cc1ccc(c2c1scc2)OCCc1nc(oc1C)c1ccc(cc1)C(F)(F)F	✓
CO[C@H](C(=O)O)Cc1ccc(c2c1scc2)OCCc1nc(oc1C)c1ccccc1	✓
CO[C@H](C(=O)O)Cc1ccc(c2c1ccs2)OCCc1nc(oc1C)c1ccccc1	✓
CO[C@H](C(=O)O)Cc1ccc(c(c1)Cl)OCCCOc1ccc(cc1)C(=O)c1ccccc1	✓
CO[C@H](C(=O)O)Cc1ccc(cc1)OCCCOc1ccc(cc1)C(=O)c1ccccc1	✓
CO[C@H](C(=O)O)Cc1ccc(cc1)OCCCOc1ccc(cc1)c1ccccc1	✓
CO[C@H](C(=O)O)Cc1ccc(c(c1)OC)OCCCOc1ccc(cc1)Oc1ccccc1	✓
CO[C@H](C(=O)O)Cc1ccc(cc1)OCCCOc1ccc(cc1)Oc1ccccc1	✓
CO[C@@H](C(=O)O)Cc1ccc(c2c1cccc2)OCCc1nc(oc1C)c1ccccc1	✓
CO[C@@H](C(=O)O)Cc1ccc(c2c1scc2)OCCc1nc(oc1C)c1ccccc1	✓
CO/N=C(/c1ccc2c(c1)C(C)(C)CCN2CCOc1ccc(cc1)C[C@@H](C(=O)O)Nc1ccccc1C(=O)c1ccccc1)\c1ccccc1						✓	✓
CO/N=C(\c1ccccc1)/c1ccc2c(c1)C(C)(C)CCN2CCOc1ccc(cc1)C[C@@H](C(=O)O)OCC(F)(F)F						✓	✓
COC(=O)[C@@H](/N=C(/C=C(/c1ccccc1)\O)\C)Cc1ccc(cc1)OCc1ccccc1						✓	✓
COC(=O)[C@@H](N/C(=C/C(=O)c1ccccc1)/C)Cc1ccc(cc1)OCc1ccccc1						✓
CSC(C(=O)OC)Cc1ccc(cc1)OCCN(c1nc2c(o1)cccc2)C						✓	✓
COC(=O)C(C(=O)OC)Cc1ccc(cc1)OCCN1CCC(c2c1ccc(c2)/C(=N\O)/c1ccccc1)(C)C						✓	✓
COC(=O)C(C(=O)OC)Cc1ccc(cc1)OCCN1CCC(c2c1ccc(c2)C(=O)c1ccccc1)(C)C						✓	✓
COC(=O)c1cc2c(c(c1C(OC(=O)C)C)O)C(=O)c1c(C2=O)c2c(cc1O)cc(c(c2OC)Cl)C	✓
COC(=O)c1cc2c(c(c1C(OC(=O)CO)C)O)C(=O)c1c(C2=O)c2c(cc1O)cc(c(c2OC)Cl)C	✓
COC(=O)c1ccc(cc1)CNC(=O)c1ccc2c(c1)c(C)c(n2Cc1ccc(cc1)c1ccccc1C(=O)O)C	✓
COc1ccc(cc1)CN1C(=O)N(C(=O)[C@@H]1CC(=O)Nc1ccc(cc1)C(=O)OC)c1cccc(c1)OC	✓
COC(=O)c1ccccc1N[C@H](C(=O)O)Cc1ccc(cc1)OCCc1nc(oc1C)c1ccccc1						✓	✓
COc1ccc(cc1)c1c(C(=O)NS(=O)(=O)c2ccccc2C(=O)OC)n(c2c1cccc2)Cc1cccc(c1)C(F)(F)F	✓
COC(=O)CCc1ccc(cc1)OCCN(c1nc2c(o1)cccc2)C						✓	✓
COC(C(=O)O)(Cc1ccc(cn1)OCCc1nc(oc1C)c1ccccc1)C						✓	✓
COC(C(=O)O)(Cc1ccc(nc1)OCCc1nc(oc1C)c1ccccc1)C						✓	✓
COC(C(=O)O)Cc1ccc(nc1)OCCc1ccc(cc1C)Oc1cccc(c1)Cl						✓	✓
COC(C(=O)O)Cc1ccc(c2c1cccc2)OCCc1nc(oc1C)c1ccccc1	✓
COC(C(=O)O)Cc1ccc(c2c1scc2)OCCc1nc(oc1C)c1ccccc1	✓
COC(C(=O)O)Cc1ccc(cn1)OCCc1nc(oc1C)c1ccccc1						✓	✓
COC(C(=O)O)Cc1ccc(nc1)OCCc1nc(oc1C)c1ccccc1						✓	✓
COC(C(=O)O)Cc1ccc(c2c1cccc2)OCCc1nc(oc1C)c1ccccc1C	✓
COC(C(=O)O)Cc1ccc(c2c1scc2)OCCc1nc(oc1C)c1ccccc1OC	✓
COC(C(=O)O)Cc1ccc(cc1)OCCN(c1nc2c(o1)cccc2)C						✓	✓
COC(C(=O)O)Cc1ccc2c(c1)ccn2Cc1nc(oc1C)c1ccccc1	✓
COC(c1ccccc1)COc1ccc(cc1)C[C@@H](C(=O)O)Nc1ccccc1C(=O)c1ccccc1						✓	✓
COc1c(cccc1Br)COc1ccc(cc1)C[C@@H](C(=O)O)Nc1ccccc1C(=O)c1ccccc1						✓	✓
COc1c(C/C=C(/CCC(=O)O)\C)c(O)c2c(c1C)COC2=O				✓
COc1c(CC=C(C)C)c(CCc2ccccc2)c(c(c1CC=C(C)C)O)C(=O)O						✓	✓
COc1c(Cl)c(C)cc2c1c1C(=O)c3cc4C(=O)OC(c4c(c3C(=O)c1c(c2)O)O)C	✓
COc1c(F)cccc1[C@@H](NC(=O)c1ccc2c(c1)c(C)c(n2Cc1ccc(cc1)c1ccccc1)C)C	✓
COc1cc(ccc1[C@@H](NC(=O)c1ccc2c(c1)c(C)c(n2Cc1ccc(cc1)c1ccccc1C(=O)O)C)C)C(F)(F)F	✓
COc1cc(ccc1C(=O)NCc1cccc(c1)Oc1ccc(c(c1)C)OC(C(=O)O)(C)C)C(F)(F)F	✓
COc1cc(ccc1OCCn1c2ccccc2c2c1cccc2)C1NC(=O)NC(=C1C(=O)O)C	✓
COc1cc(ccc1OCCn1ccc2c1nccc2)C1NC(=O)NC(=C1C(=O)O)C	✓
COc1cc(ccc1OCCOc1cc(C)nc2c1cccc2)C1NC(=O)NC(=C1C(=O)O)C	✓
COc1cc(ccc1OCCOc1cccc2c1nc(C)cc2)C1NC(=O)NC(=C1C(=O)O)C	✓
COc1cc(CCc2ccccc2)c(c(c1C/C=C(/CCC=C(C)C)\C)O)C(=O)O				✓
COc1cc(CCc2ccccc2)c(c(c1CC=C(C)C)O)C(=O)O				✓
COc1cc(CNC(=O)c2ccc3c(c2)c(C)c(n3Cc2ccc(cc2)c2ccccc2C(=O)O)C)cc(c1)OC	✓
COc1cc(F)cc(c1)[C@@H](NC(=O)c1ccc2c(c1)c(C)c(n2Cc1ccc(cc1)c1ccccc1)C)C	✓
COc1cc(ccc1Oc1cncc(c1)Cl)NS(=O)(=O)c1ccc(cc1Cl)Cl	✓
COc1cc(cc(c1)OC)[C@@H](NC(=O)c1ccc2c(c1)c(C)c(n2Cc1ccc(cc1)c1ccccc1)C)C	✓
COc1cc(OCC(=O)O)c(cc1SCc1ccc(cc1)OCc1ccc(cc1)C(F)(F)F)C	✓
COc1cc2O[C@@H](CC(=O)c2cc1CC=C(C)C)c1ccc(cc1)O	✓					✓	✓
COc1cc2O[C@H](CC(=O)c2cc1CC=C(C)C)c1ccc(cc1)O	✓					✓	✓
COc1cc2oc(cc(=O)c2cc1CC=C(C)C)c1ccc(cc1)O	✓					✓	✓
COc1ccc(cc1)/C=C/c1cc(O)c(c(c1)O)C/C=C(/CCC=C(C)C)\C	✓
COc1ccc(c(c1)C)C(=O)NCc1cccc(c1)Oc1ccc(c(c1)C)OC(C(=O)O)(C)C	✓
COc1ccc(cc1)[C@H](NC(=O)c1ccc2c(c1)c(C)c(n2Cc1ccc(cc1)c1ccccc1C(=O)O)C)C	✓
COc1ccc(cc1)[C@@H](NC(=O)c1ccc2c(c1)c(C)c(n2Cc1ccc(cc1)c1ccccc1C(=O)O)C)C	✓
COc1ccc(cc1)C(=O)c1c2ccc(nc2n(c1C)Cc1cc(ccc1Cl)O[C@H](C(=O)O)C)OC	✓
COc1ccc(cc1)C(=O)c1c2ccc(nc2n(c1C)Cc1cc(ccc1F)O[C@H](C(=O)O)C)C	✓
COc1ccc(cc1)C(=O)c1c2ccc(nc2n(c1C)Cc1cc(ccc1F)O[C@H](C(=O)O)C)OC	✓
COc1ccc(cc1)C(=O)c1c2cccnc2n(c1C)Cc1cc(ccc1F)O[C@H](C(=O)O)C	✓
COc1ccc2c(n1)n(Cc1ccc(c(c1)O[C@H](C(=O)O)C)F)c(c2C(=O)c1ccc(cc1)OC)C	✓
COc1ccc(cc1)C(=O)c1c(C)n(c2c1cccn2)Cc1ccc(c(c1)O[C@H](C(=O)O)C)F	✓
COc1ccc(cc1)C(=O)c1c(C)n(c2c1ccc(c2)OC(F)(F)F)Cc1cccc(c1)O[C@H](C(=O)O)C	✓
COc1ccc(cc1)C(=O)c1c(C)n(c2c1ccc(n2)C)Cc1cccc(c1)O[C@H](C(=O)O)C	✓
COc1ccc(cc1)C(=O)c1c(C)n(c2c1cccn2)Cc1cccc(c1)O[C@H](C(=O)O)C	✓
COc1ccc(cc1)C(=O)c1c(C)n(c2c1cccn2)Cc1cccc(c1)O[C@@H](C(=O)O)C	✓
COc1ccc(cc1)C(=O)c1ccccc1NC(C(=O)O)Cc1ccc(cc1)OCCN(c1nc2c(o1)cccc2)C						✓	✓
COc1ccc(cc1)C(=O)n1c(C)c(c2c1ccc(c2)OC(F)(F)F)Cc1cccc(c1)O[C@H](C(=O)O)C	✓
COc1ccc(cc1)C(=O)n1c(C)c(c2c1ccc(c2)OC(F)(F)F)Cc1cccc(c1)O[C@@H](C(=O)O)C	✓
COc1ccc(cc1)C(=O)n1c(C)c(c2c1ccc(c2)OC(F)(F)F)Cc1cccc(c1)OC(C(=O)O)(C)C	✓
COc1ccc(cc1)C(=O)n1c(C)c(c2c1ccc(c2)OC(F)(F)F)Cc1cccc(c1)OC(C(=O)O)C	✓
C#CCOc1cccc(c1)Cc1c(C)n(c2c1cc(cc2)OC(F)(F)F)C(=O)c1ccc(cc1)OC	✓
N#CCOc1cccc(c1)Cc1c(C)n(c2c1cc(cc2)OC(F)(F)F)C(=O)c1ccc(cc1)OC	✓
COc1ccc(cc1)C(=O)n1c(C)c(c2c1ccc(c2)OC(F)(F)F)Cc1ccccc1O[C@H](C(=O)O)C	✓
COc1ccc(cc1)C(=O)n1c(C)c(c2c1ccc(c2)OC(F)(F)F)Cc1ccccc1O[C@@H](C(=O)O)C	✓
COc1ccc(cc1)C(=O)n1c(C)c(c2c1ccc(c2)OC(F)(F)F)Cc1ccccc1OC(C(=O)O)(C)C	✓
COc1ccc(cc1)C(=O)n1c(C)c(c2c1ccc(c2)OC(F)(F)F)Cc1ccccc1OC(C(=O)O)C	✓
COc1ccc(cc1)C(=O)NC[C@@H](Nc1ccccc1C(=O)c1ccccc1)Cc1ccc(cc1)OCCc1nc(oc1C)c1ccccc1						✓	✓
COc1ccc(cc1)C(C(=O)c1ccc(cc1O)O)C	✓
COc1ccc(cc1)c1c(C(=O)NS(=O)(=O)C)n(c2c1cccc2)Cc1cccc(c1)C(F)(F)F	✓
COc1ccc(cc1)c1c(C(=O)NS(=O)(=O)c2ccc(cc2)F)n(c2c1cccc2)Cc1cccc(c1)C(F)(F)F	✓
COc1ccc(cc1)c1c(C(=O)NS(=O)(=O)c2cccc(c2)C(F)(F)F)n(c2c1cccc2)Cc1cccc(c1)C(F)(F)F	✓
COc1ccc(cc1)c1c(C(=O)NS(=O)(=O)c2ccccc2)n(c2c1cccc2)Cc1cccc(c1)C(F)(F)F	✓
COc1ccc(cc1)c1c(C(=O)NS(=O)(=O)c2ccccc2C)n(c2c1cccc2)Cc1cccc(c1)C(F)(F)F	✓
COc1ccc(cc1)C1COc2c(C1=O)ccc(c2)O	✓
COc1ccc(cc1)c1nc(c(o1)C)CCOc1ccc(cc1)C[C@@H](C(=O)O)Nc1ccccc1C(=O)c1ccccc1						✓	✓
COc1ccc(cc1)c1oc(c(n1)CCOc1ccc(cn1)CC1(CCCO1)C(=O)O)C						✓	✓
COc1ccc(cc1)c1oc(c(n1)CCOc1ccc(nc1)CC1(CCCO1)C(=O)O)C						✓	✓
COc1ccc(cc1)c1nc(c(o1)C)CCOc1cccc(c1)C[C@@H]1C(=O)N([C@@H]1C(=O)O)c1ccc(cc1)C(C)(C)C	✓
COc1ccc(cc1)c1oc(c(n1)COc1cccc(c1)CN(C(=O)Oc1ccc(cc1)C)CC(=O)O)C	✓
COc1ccc(cc1)N1C(=O)[C@H]([C@H]1C(=O)O)Cc1ccc(cc1)OCCc1nc(oc1C)c1ccccc1	✓
COc1ccc(cc1)N1C(=O)[C@H]([C@H]1C(=O)O)Cc1cccc(c1)OCCc1nc(oc1C)c1ccccc1	✓
COc1ccc(cc1)N1C(=O)[C@@H]([C@@H]1C(=O)O)Cc1ccc(cc1)OCCc1nc(oc1C)c1ccccc1	✓
COc1ccc(cc1)N1C(=O)[C@@H]([C@@H]1C(=O)O)Cc1cccc(c1)OCCc1nc(oc1C)c1ccccc1	✓
COc1ccc(cc1)n1c2ccccc2c(c1C(=O)O)Oc1cccc(c1)C(F)(F)F	✓
COc1ccc(cc1)N1C(=O)C(C1C(=O)O)Cc1cccc(c1)OCCc1nc(oc1C)c1ccccc1	✓
COc1ccc(cc1)n1c(C)c(c2c1ccc(c2)OC(F)(F)F)Cc1cccc(c1)O[C@H](C(=O)O)C	✓
COc1ccc(cc1Cl)[C@@H](NC(=O)c1ccc2c(c1)c(C)c(n2Cc1ccc(cc1)c1ccccc1C(=O)O)C)C	✓
COc1ccc(cc1C(=O)NCc1ccc(cc1)C(F)(F)F)CC1SC(=O)NC1=O	✓	✓		✓	✓	✓	✓	✓
COc1ccc(cc1)CCc1c([nH]c2c1cc(cc2)CC(=O)O)c1ccccc1	✓		✓			✓	✓		✓
COc1ccc(cc1)CCCOc1ccc(cc1)C[C@@H](C(=O)O)Nc1ccccc1C(=O)c1ccccc1						✓	✓
COc1ccc(cc1OC)CCCOc1ccc(cc1)C[C@@H](C(=O)O)Nc1ccccc1C(=O)c1ccccc1						✓	✓
COc1ccc(cn1)N1C(=O)C(C1C(=O)O)Cc1cccc(c1)OCCc1nc(oc1C)c1ccccc1	✓
COc1ccc(cc1O[C@H](C(=O)O)C)Cn1c(C)c(c2c1ccc(c2)C(=O)N[C@H](c1ccc(cc1)C(C)(C)C)C)C	✓
COc1ccc(cc1O[C@H](C(=O)O)C)Cn1c(C)c(c2c1ccc(c2)C(=O)N[C@H](c1cccc(c1)C(C)C)C)C	✓
COc1ccc(cc1O[C@H](C(=O)O)C)Cn1c(C)c(c2c1ccc(c2)C(=O)N[C@H](c1cccc(c1)C1CC1)C)C	✓
COc1cc(OC)ccc1CNC(=O)c1ccc2c(c1)c(C)c(n2Cc1ccc(cc1)c1ccccc1C(=O)O)C	✓
COc1ccc(cc1)CNC(=O)c1ccc2c(c1)c(C)c(n2Cc1ccc(cc1)c1ccccc1C(=O)O)C	✓
COc1ccc(cc1F)CNC(=O)c1ccc2c(c1)c(C)c(n2Cc1ccc(cc1)c1ccccc1C(=O)O)C	✓
COc1cc(CNC(=O)c2ccc3c(c2)c(C)c(n3Cc2ccc(cc2)c2ccccc2C(=O)O)C)ccc1OC	✓
COc1cc(OC)ccc1CNC(=O)c1ccc2c(c1)ccn2Cc1ccc(cc1F)F	✓
COc1cc(CNC(=O)c2ccc3c(c2)ccn3Cc2ccc(cc2F)F)ccc1OC	✓
COc1ccc(cc1)COc1ccc(cc1)CSc1ccc(c2c1CCC2)OCC(=O)O	✓
COc1ccc(cc1)COCCN(c1ccc(cc1)C=C1C(=O)NC(=O)NC1=O)CCOc1ccccn1	✓
COc1ccc(cc1)COCCN(c1ccc(cc1)C=C1C(=O)NC(=O)NC1=O)CCOCc1ccc(cc1)OC	✓
COc1ccc(cc1)COCCN(c1ccc(cc1)C=C1C(=O)NC(=O)NC1=O)CCOCc1ccccc1	✓
COc1ccc(cc1[C@@H](NC(=O)c1ccc2c(c1)c(C)c(n2Cc1ccc(cc1)c1ccccc1C(=O)O)C)C)F	✓
COc1ccc(cc1)OC(=O)N(Cc1ccc(cc1)OCCc1nc(oc1C)c1ccc(cc1)O)CC(=O)O	✓
COc1ccc(cc1)OC(=O)N(Cc1ccc(cc1)OCCc1nc(oc1C)c1ccccc1)CC(=O)O	✓
COc1ccc(cc1)OS(=O)(=O)/C=C/c1ccccc1	✓
COc1ccc2c(c1)c(Cc1ccc(cc1)C(=O)O)c(n2C(=O)c1ccc(cc1)Cl)C	✓
COc1ccc2c(c1)c(Cc1ccc(cc1)OC(C(=O)O)(C)C)c(n2C(=O)c1ccc(cc1)Cl)C	✓
COc1ccc2c(c1)c(Cc1ccc(cc1)OC(C(=O)O)C)c(n2C(=O)c1ccc(cc1)Cl)C	✓
COc1ccc2c(c1)c(Cc1ccc(cc1)OCC(=O)O)c(n2C(=O)c1ccc(cc1)Cl)C	✓
COc1ccc2c(c1)c(Cc1cccc(c1)C(=O)O)c(n2C(=O)c1ccc(cc1)Cl)C	✓
COc1ccc2c(c1)c(Cc1cccc(c1)OC(C(=O)O)(C)C)c(n2C(=O)c1ccc(cc1)Cl)C	✓
COc1ccc2c(c1)c(Cc1cccc(c1)OC(C(=O)O)C)c(n2C(=O)c1ccc(cc1)Cl)C	✓
COc1ccc2c(c1)c(Cc1ccccc1C(=O)O)c(n2C(=O)c1ccc(cc1)Cl)C	✓
COc1ccc2c(c1)c(Cc1ccccc1OC(C(=O)O)(C)C)c(n2C(=O)c1ccc(cc1)Cl)C	✓
COc1ccc2c(c1)c(Cc1ccccc1OC(C(=O)O)C)c(n2C(=O)c1ccc(cc1)Cl)C	✓
COc1ccc2c(c1)c(Cc1ccccc1OCC(=O)O)c(n2C(=O)c1ccc(cc1)Cl)C	✓
COc1ccc2c(c1)c(Oc1cccc(c1)C(F)(F)F)c(n2c1ccc(cc1)C(C)(C)C)C(=O)O	✓
COc1ccc2c(c1)ccn2S(=O)(=O)c1cccc(c1)C(=O)Nc1ccc(cc1C(=O)O)C	✓
COc1ccc2c(c1C)ccn2S(=O)(=O)c1cccc(c1)C(=O)Nc1ccc(cc1C(=O)O)C	✓
COc1ccc2c(c1)ccn2S(=O)(=O)c1cccc(c1)C(=O)Nc1ccc(cc1C(=O)O)Cl	✓
COc1ccc2c(c1C)ccn2S(=O)(=O)c1cccc(c1)C(=O)Nc1ccc(cc1C(=O)O)Cl	✓
COc1ccc2c(c1)onc2c1c(C)n(c2c1ccc(c2)OC(F)(F)F)Cc1cc(ccc1Cl)O[C@H](C(=O)O)C	✓
COc1ccc2c(c1)onc2n1c2ccc(cc2n(c1=O)c1cccc(c1)[C@@]1(C)OC(=O)NC1=O)C(F)(F)F	✓
COc1ccc2c(c1)onc2n1c(=O)n(c2c1ccc(c2)C(F)(F)F)Cc1cc(ccc1Cl)[C@@]1(C)OC(=O)NC1=O	✓
COc1ccc2c(c1)onc2n1c(=O)n(c2c1cccc2)Cc1cc(ccc1Cl)[C@@]1(C)OC(=O)NC1=O	✓
COc1ccc2c(c1)onc2n1c(=O)n(c2c1ccc(c2)C(F)(F)F)Cc1cc(ccc1Cl)O[C@@H](C(=O)O)C	✓
COc1ccc2c(c1)onc2n1c(=O)n(c2c1cccc2)Cc1cc(ccc1Cl)O[C@@H](C(=O)O)C	✓
COc1ccc2c(c1)onc2n1c(=O)n(c2c1ccc(c2)C(F)(F)F)Cc1ccc(cc1)[C@@]1(C)OC(=O)NC1=O	✓
COc1ccc2c(c1)onc2n1c(=O)n(c2c1ccc(c2)C(F)(F)F)Cc1ccc(c(c1)O[C@H](C(=O)O)C)Cl	✓
COc1ccc2c(c1)onc2n1c(=O)n(c2c1ccc(c2)C(F)(F)F)Cc1ccc(c(c1)O[C@@H](C(=O)O)C)Cl	✓
COc1ccc2c(c1)onc2n1c(=O)n(c2c1ccc(c2)OC(F)(F)F)Cc1ccc(c(c1)O[C@@H](C(=O)O)C)Cl	✓
COc1ccc2c(c1)onc2n1c(=O)n(c2c1cc(cc2)C(F)(F)F)Cc1ccc(c(c1)O[C@@H](C(=O)O)C)Cl	✓
COc1ccc2c(c1)onc2n1c(=O)n(c2c1cc(cc2)OC(F)(F)F)Cc1ccc(c(c1)O[C@@H](C(=O)O)C)Cl	✓
COc1ccc2c(c1)onc2n1c(=O)n(c2c1cccc2)Cc1ccc(c(c1)O[C@@H](C(=O)O)C)Cl	✓
COc1ccc2c(c1)onc2n1c(=O)n(c2c1ccc(c2)C(F)(F)F)Cc1cccc(c1)[C@@]1(C)OC(=O)NC1=O	✓
COc1ccc2c(c1)onc2n1c(=O)n(c2c1cccc2)Cc1cccc(c1)[C@@]1(C)OC(=O)NC1=O	✓
COc1ccc2c(c1)onc2n1c(=O)n(c2c1ccc(c2)C(F)(F)F)Cc1cccc(c1)O[C@@H](C(=O)O)C	✓
COc1ccc2c(c1)onc2n1c2ccc(cc2n(c1=O)Cc1ccccc1[C@@]1(C)OC(=O)NC1=O)C(F)(F)F	✓
COc1ccc2c(c1)onc2n1c(C)c(c2c1ccc(c2)OC(F)(F)F)Cc1cc(ccc1Cl)O[C@@H](C(=O)O)C	✓
COc1ccc2c(n1)n(c1ccc(cc1)C(C)(C)C)c(c2Oc1cccc(c1)C(F)(F)F)C(=O)O	✓
COc1ccc2c(c1)n(cc2)S(=O)(=O)c1cccc(c1)C(=O)Nc1ccc(cc1C(=O)O)C	✓
COc1ccc2c(c1)n(cc2)S(=O)(=O)c1cccc(c1)C(=O)Nc1ccc(cc1C(=O)O)Cl	✓
COc1ccc2c(c1)CCN(C2)S(=O)(=O)c1cccc(c1)C(=O)Nc1ccc(cc1C(=O)O)Cl	✓
COc1ccc2c(c1)ccc(n2)n1c(C)c(c2c1ccc(c2)OC(F)(F)F)Cc1cccc(c1)O[C@H](C(=O)O)C	✓
COc1ccc2c(c1)cc(cn2)n1c(C)c(c2c1ccc(c2)OC(F)(F)F)Cc1cccc(c1)O[C@H](C(=O)O)C	✓
COc1cccc(c1)[C@@H](N=C(c1ccc2c(c1)c(C)c(n2Cc1ccc(cc1)c1ccccc1)C)O)C	✓
COc1cccc(c1)[C@@H](NC(=O)c1ccc2c(c1)c(C)c(n2Cc1ccc(cc1)c1ccccc1C(=O)O)C)C	✓
COc1cccc(c1)C(=O)c1ccccc1NC(C(=O)O)Cc1ccc(cc1)OCCN(c1nc2c(o1)cccc2)C						✓	✓
COc1cccc(c1)c1oc(c(n1)CCOc1ccc(cn1)CC1(CCCO1)C(=O)O)C						✓	✓
COc1cccc(c1)c1oc(c(n1)CCOc1ccc(nc1)CC1(CCCO1)C(=O)O)C						✓	✓
COc1cccc(c1)c1oc(c(n1)CCOc1cccc(c1)C[C@@H]1C(=O)N([C@@H]1C(=O)O)c1ccc(cc1)C(C)(C)C)C	✓
COc1cccc(c1C(=O)c1nc(c2n1CCCC2)c1ccc(cc1F)C(=O)O)C(F)(F)F	✓
COc1cccc(c1)CC(=O)N1Cc2c(C1)cc(cc2)S(=O)(=O)Nc1cnn(n1)C1CCC1	✓
COc1cccc(c1C(=O)c1nc(c2n1CCCC2)c1ccc(cc1F)C(=O)O)Cl	✓
COc1cccc(c1)Cn1c(cc2c1cccc2)C(=O)NS(=O)(=O)c1cccc(c1)C(F)(F)F	✓
COc1cccc(c1)CNC(=O)c1ccc2c(c1)c(C)c(n2Cc1ccc(cc1)c1ccccc1C(=O)O)C	✓
COc1cccc(c1)Oc1c(C(=O)O)n(c2c1ccc(n2)Cl)c1ccc(cc1)C(C)(C)C	✓
COc1cccc(n1)SCCOc1ccc(cc1)C[C@@H](C(=O)O)Nc1ccccc1C(=O)c1ccccc1						✓	✓
COc1cccc2c1c1ccccc1n2CCOc1ccc(cc1)C1NC(=O)NC(=C1C(=O)O)C	✓
COc1cccc2c1ccn2S(=O)(=O)c1cccc(c1)C(=O)Nc1ccc(cc1C(=O)O)C	✓
COc1cccc2c1ccn2S(=O)(=O)c1cccc(c1)C(=O)Nc1ccc(cc1C(=O)O)Cl	✓
COc1cccc2c1n(cc2)S(=O)(=O)c1cccc(c1)C(=O)Nc1ccc(cc1C(=O)O)C	✓
COc1cccc2c1CCN(C2)S(=O)(=O)c1cccc(c1)C(=O)Nc1ccc(cc1C(=O)O)Cl	✓
COc1ccccc1[C@@H](NC(=O)c1ccc2c(c1)c(C)c(n2Cc1ccc(cc1)c1ccccc1)C)C	✓
COc1ccccc1C(=O)c1ccccc1NC(C(=O)O)Cc1ccc(cc1)OCCN(c1nc2c(o1)cccc2)C						✓	✓
COc1ccccc1C(=O)N1CCC[C@H]1COc1ccc(cc1)C[C@@H](C(=O)O)Nc1ccccc1C(=O)c1ccccc1						✓	✓
COC1Oc2cc(O)c3c(c2C(=O)N1C(=O)NCc1cccc2c1cccc2)OC1=CC(=C(C(=O)[C@@]31C)C(=O)C)O	✓					✓	✓
COC1Oc2cc(O)c3c(c2C(=O)N1C(=O)NCc1ccco1)OC1=CC(=C(C(=O)[C@@]31C)C(=O)C)O	✓
COCC#CCOc1cc(ccc1Sc1ccc(c2c1CCCC2)OCC(=O)O)COc1ccc(cc1)C(F)(F)F						✓	✓
COCCC#CCOc1cc(ccc1Sc1ccc(c2c1CCCC2)OCC(=O)O)COc1ccc(cc1)C(F)(F)F						✓	✓
COCCCOc1cc(ccc1Sc1ccc(c(c1C)C)OCC(=O)O)COc1ccc(cc1)C(F)(F)F						✓	✓
COCCN(S(=O)(=O)c1ccc(c(c1C)C)OC(C(=O)O)C)c1cccc(c1C)c1ccc(cc1)Cl	✓
COCCNC(=O)c1ccc2c(c1)c(C)c(n2Cc1ccc(cc1)c1ccccc1C(=O)O)C	✓
COCCNc1sc(c(n1)CCOc1ccc(cc1)C[C@@H](C(=O)O)Nc1ccccc1C(=O)c1ccccc1)C						✓	✓
COCCOc1cc(ccc1Sc1ccc(c(c1C)C)OCC(=O)O)COc1ccc(cc1)C(F)(F)F						✓	✓
COCn1c(CCOc2ccc(cc2)C[C@@H](C(=O)O)Nc2ccccc2C(=O)c2ccccc2)c(nc1c1ccccc1)C						✓	✓
COP(=O)(C(c1ccc(cc1)Cl)OP(=O)(OC)OC)OC	✓
Clc1ccc(c(c1)Cl)S(=O)(=O)Nc1ccc(c(c1)S(=O)(=O)C)Oc1cncc(c1)Cl	✓
Clc1cccc(c1)CN1C(=O)S/C(=C\c2ccc(cc2)S(=O)(=O)C)/C1=O						✓	✓	✓
O=C1S/C(=C\c2ccc(cc2)S(=O)(=O)C)/C(=O)N1Cc1ccccc1Br						✓	✓	✓
O=C(c1cc2c(n1Cc1cccc(c1)C(F)(F)F)cccc2)NS(=O)(=O)C	✓
CSc1ccc(cc1)COc1ccc(cc1)C[C@@H](C(=O)O)Nc1ccccc1C(=O)c1ccccc1						✓	✓
CSc1sc(c(n1)NC(C(=O)O)Cc1ccc(cc1)OCCN(c1nc2c(o1)cccc2)C)C(=O)c1ccccc1						✓	✓
CSc1nc(SCc2ccccc2)c(c(n1)SCc1ccccc1)C(=O)O	✓
Clc1ccc(c(c1)Cl)S(=O)(=O)Nc1cc(c(c(c1)C(F)(F)F)Oc1cncc(c1)Cl)C(F)(F)F	✓
Clc1ccc(c(c1)Cl)S(=O)(=O)Nc1ccc(c(c1)C(F)(F)F)Oc1cncc(c1)Cl	✓
Clc1cc(cc(c1Oc1cnc2c(c1)cccc2)Cl)NS(=O)(=O)c1ccc(cc1Cl)C(F)(F)F	✓
O=C(c1cc2c(n1Cc1ccc(cc1)C(F)(F)F)cccc2)NS(=O)(=O)c1ccc(cc1)C(F)(F)F	✓
O=C(c1cc2c(n1Cc1ccc(cc1)C(F)(F)F)cccc2)NS(=O)(=O)c1cccc(c1)C(F)(F)F	✓
O=C(c1cc2c(n1C(=O)c1cccc(c1)C(F)(F)F)cccc2)NS(=O)(=O)c1cccc(c1)C(F)(F)F	✓
Clc1ccc(c(c1)Cn1c(cc2c1cccc2)C(=O)NS(=O)(=O)c1cccc(c1)C(F)(F)F)Cl	✓
O=C(c1cc2c(n1Cc1cccc(c1)OCc1ccccc1)cccc2)NS(=O)(=O)c1cccc(c1)C(F)(F)F	✓
O=C(c1cc2c(n1Cc1ccccc1)cccc2)NS(=O)(=O)c1cccc(c1)C(F)(F)F	✓
Clc1ccc2c(c1)cc(n2Cc1cccc(c1)C(F)(F)F)C(=O)NS(=O)(=O)c1cccc(c1)C(F)(F)F	✓
O=C(c1cc2c(n1Cc1cccc(c1)C(F)(F)F)ccc(c2)OCc1ccccc1)NS(=O)(=O)c1cccc(c1)C(F)(F)F	✓
Clc1ccc(cc1)S(=O)(=O)NC(=O)c1cc2c(n1Cc1cccc(c1)C(F)(F)F)cccc2	✓
Clc1ccc(s1)S(=O)(=O)NC(=O)c1cc2c(n1Cc1cccc(c1)C(F)(F)F)cccc2	✓
O=C(c1cc2c(n1Cc1cccc(c1)C(F)(F)F)cccc2)NS(=O)(=O)c1ccc2c(c1)cccc2	✓
O=C(c1cc2c(n1Cc1cccc(c1)C(F)(F)F)cccc2)NS(=O)(=O)c1cccc(c1)C(F)(F)F	✓
O=C(c1cc2c(n1Cc1cccc(c1)C(F)(F)F)cccc2)NS(=O)(=O)c1ccccc1	✓
O=C(c1cc2c(n1Cc1cccc(c1)C(F)(F)F)cccc2)NS(=O)(=O)c1ccccc1C(F)(F)F	✓
O=C(c1cc2c(n1Cc1cccc(c1)OC(F)(F)F)cccc2)NS(=O)(=O)c1cccc(c1)C(F)(F)F	✓
Clc1ccc(c(c1)Cl)S(=O)(=O)Nc1cc(F)c(c(c1)Cl)Oc1cncc(c1)Cl	✓
Clc1ccc(c(c1)Cl)S(=O)(=O)Nc1ccc(c(c1)F)Oc1cnc2c(c1)cccc2	✓
Clc1ccc(c(c1)Cl)S(=O)(=O)Nc1ccc(c(c1)F)Oc1cncc(c1)Cl	✓
Fc1ccc(cc1)n1nc(cc1NS(=O)(=O)c1cc(cc(c1)C(F)(F)F)C(F)(F)F)c1cccs1	✓
Fc1ccc(cc1)n1nc(cc1NS(=O)(=O)c1ccc(s1)c1noc(c1)C(F)(F)F)c1cccs1	✓
Fc1ccc(cc1)n1nc(cc1NS(=O)(=O)c1cccc(c1)F)c1cccs1	✓
Fc1ccc(cc1)S(=O)(=O)NC(=O)c1cc2c(n1Cc1cccc(c1)C(F)(F)F)cccc2	✓
Fc1ccc(c(c1)F)Cn1ccc2c1ccc(c2)C(=O)N[C@@H]1C[C@H]1c1ccccc1	✓
Fc1ccc(c(c1)F)Cn1ccc2c1ccc(c2)C(=O)NCc1ccccc1	✓
Fc1ccc(c(c1)F)Cn1ccc2c1ccc(c2)C(=O)NCc1cccs1	✓
Clc1ccc(c(c1)Cl)/C=C/1\SC(=O)N(C1=O)Cc1c(F)cccc1Cl						✓	✓	✓
NC(=O)C[C@@H](C(=O)O)NC(=O)[C@H](Cc1c[nH]c2c1cccc2)N	✓
OC(=O)C[C@@H](C(=O)O)NC(=O)[C@H](Cc1c[nH]c2c1cccc2)N	✓
NC(=O)CC[C@@H](C(=O)O)NC(=O)[C@H](Cc1c[nH]c2c1cccc2)N	✓
OC(=O)CC[C@@H](C(=O)O)NC(=O)[C@H](Cc1c[nH]c2c1cccc2)N	✓
OC(=O)CCC[C@@H](C(=O)O)NC(=O)[C@H](Cc1c[nH]c2c1cccc2)N	✓
NC(=N)NCCC[C@@H](C(=O)O)NC(=O)[C@H](Cc1c[nH]c2c1cccc2)N	✓
Clc1ccc(c(c1)Cl)S(=O)(=O)Nc1cc(Cl)c(c(c1)Cl)Oc1cncc(c1)C(=O)N	✓
Nc1ccc(cc1)CNC(=O)c1ccc2c(c1)ccn2Cc1ccc(cc1F)F	✓
O=C(CN1CC(=O)Nc2c1cccc2)Nc1ccc(cc1)S(=O)(=O)NC(=O)NC1CCCCC1	✓
O=C1Nc2ccccc2N(C1)C(=O)CNc1ccc(cc1)S(=O)(=O)NC(=O)NC1CCCCC1	✓
O=C1SCC(=O)N1Cc1ccc2c(c1)c(CCc1ccccc1)c([nH]2)c1ccccc1						✓	✓	✓
O=C1NC(=O)[C@@H](S1)c1cccc(c1)OCCCOc1ccc(cc1)Oc1ccccc1	✓	✓
N#Cc1ccc(cc1)OCCN(c1ccc(cc1)C=C1C(=O)NC(=O)NC1=O)CCOc1ccc(cc1)C#N	✓
O=C1NC(=O)NC(=O)C1=Cc1ccc(cc1)N(CCOCc1ccccc1)CCOCc1ccccc1	✓
O=C1NC(=O)C(=Cc2ccc(cc2)OCc2ccccc2)C(=O)N1	✓
O=C1NC(=O)C(S1)c1cccc(c1)OCCCOc1ccc(cc1)Oc1ccccc1	✓	✓
O=Cc1ccc(cc1)OS(=O)(=O)/C=C/c1ccccc1	✓
O=S(=O)(Oc1ccc(cc1)OCc1ccccc1)/C=C/c1ccccc1	✓
O=S(=O)(Oc1ccc2c(c1)cccc2)/C=C/c1ccccc1	✓
O=S(=O)(Oc1cccc(c1)Oc1ccccc1)/C=C/c1ccccc1	✓
O=S(=O)(Oc1ccccc1)/C=C/c1ccccc1	✓
OC(=O)[C@@H]1CCc2c(O1)cc(cc2)OCCCOc1ccc(cc1Cl)OCC(F)(F)F	✓
OC(=O)[C@@H](Nc1ccccc1C(=O)c1ccccc1)Cc1ccc(cc1)OC[C@@H]1CCCN1c1ccc(cc1)[N+](=O)[O-]						✓	✓
OC(=O)[C@@H](Nc1ccccc1C(=O)c1ccccc1)Cc1ccc(cc1)OC1CCN1C(c1ccccc1)c1ccccc1						✓	✓
OC(=O)[C@@H](Nc1ccccc1C(=O)c1ccccc1)Cc1ccc(cc1)OCc1ccc(cc1)Cl						✓	✓
OC(=O)[C@@H](Nc1ccccc1C(=O)c1ccccc1)Cc1ccc(cc1)OCC1CCc2c(C1)cccc2						✓	✓
Ic1cccc(c1)COc1ccc(cc1)C[C@@H](C(=O)O)Nc1ccccc1C(=O)c1ccccc1						✓	✓
OC(=O)[C@@H](/N=C/1\CCCC\C1=C(/c1ccccc1)\O)Cc1ccc(cc1)OCc1ccccc1						✓	✓
OC(=O)[C@@H](NC1=C(CCCC1)C(=O)c1ccccc1)Cc1ccc(cc1)OCc1ccccc1						✓
OC(=O)[C@@H](Nc1ccc(cc1)C(=O)c1ccccc1)Cc1ccc(cc1)OCc1ccccc1						✓
OC(=O)[C@@H](Nc1ccccc1C(=O)c1ccccc1)Cc1ccc(cc1)OCc1ccccc1						✓
OC(=O)[C@@H](Nc1ccccc1C(=O)c1ccccc1)Cc1ccc(cc1)OCC1COCCOCCOCCO1						✓	✓
OC(=O)[C@@H](Nc1ccccc1C(=O)c1ccccc1)Cc1ccc(cc1)OCCc1ccc(cc1)Cl						✓	✓
OC(=O)[C@@H](Nc1ccccc1C(=O)c1ccccc1)Cc1ccc(cc1)OCCc1ccc(cc1)OC(F)(F)F						✓	✓
Brc1cccc(c1)CCOc1ccc(cc1)C[C@@H](C(=O)O)Nc1ccccc1C(=O)c1ccccc1						✓	✓
Fc1cccc(c1)CCOc1ccc(cc1)C[C@@H](C(=O)O)Nc1ccccc1C(=O)c1ccccc1						✓	✓
OC(=O)[C@@H](Nc1ccccc1C(=O)c1ccccc1)Cc1ccc(cc1)OCCc1ccccn1						✓	✓
OC(=O)[C@@H](Nc1ccccc1C(=O)c1ccccc1)Cc1ccc(cc1)OCCc1scnc1c1ccccc1						✓	✓
OC(=O)[C@@H](Nc1ccccc1C(=O)c1ccccc1)Cc1ccc(cc1)OCCCc1ccncc1						✓	✓
OC(=O)[C@@H](Nc1ccccc1C(=O)c1ccccc1)Cc1ccc(cc1)OCCOc1c(Cl)cccc1Cl						✓	✓
OC(=O)[C@@H](Nc1ccccc1C(=O)c1ccccc1)Cc1ccc(cc1)OCCOc1ccc(cc1)Br						✓	✓
OC(=O)[C@@H](Nc1ccccc1C(=O)c1ccccc1)Cc1ccc(cc1)OCCOc1ccc(cn1)[N+](=O)[O-]						✓	✓
ClSc1ccc(cc1)OCCOc1ccc(cc1)C[C@@H](C(=O)O)Nc1ccccc1C(=O)c1ccccc1						✓	✓
N#Cc1cccc(c1)OCCOc1ccc(cc1)C[C@@H](C(=O)O)Nc1ccccc1C(=O)c1ccccc1						✓	✓
OC(=O)[C@@H](Nc1ccccc1C(=O)c1ccccc1)Cc1ccc(cc1)OCCOCc1ccccc1						✓	✓
Clc1ccc(cc1)C(=O)NC(C(=O)O)(C(=O)O)Cc1c[nH]c2c1ccc(c2)OCc1ccccc1				✓
OC(=O)C(Cc1c[nH]c2c1ccc(c2)OCc1ccccc1)NC(=O)c1ccc(cc1)Cl				✓
Clc1ccc(cc1)C(C(=O)O)Oc1cccc(c1)C(F)(F)F	✓		✓
OC(=O)c1c(Oc2cccc(c2)C(F)(F)F)c2c(n1c1ccc(cc1)C(F)(F)F)cccc2	✓
Clc1ccc2c(c1)c(Sc1ccccc1)c(n2Cc1ccc(cc1)Cl)C(=O)O	✓			✓
Brc1ccc(c(c1)C(=O)O)NC(=O)c1cccc(c1)S(=O)(=O)N1CCc2c(C1)cccc2	✓
O=C(c1cccc(c1)S(=O)(=O)N1CCc2c(C1)cccc2)Nc1ccc(cc1C(=O)O)C(F)(F)F	✓
Clc1ccc(c(c1)C(=O)O)NC(=O)c1cccc(c1)S(=O)(=O)N1CCc2c(C1)cccc2O	✓
Clc1ccc(c(c1)C(=O)O)NC(=O)c1cccc(c1)S(=O)(=O)N1CCc2c(C1)cc(cc2)Cl	✓
Clc1ccc(c(c1)C(=O)O)NC(=O)c1cccc(c1)S(=O)(=O)N1CCc2c(C1)cc(cc2)F	✓
Clc1ccc(c(c1)C(=O)O)NC(=O)c1cccc(c1)S(=O)(=O)N1CCc2c(C1)cccc2	✓
Fc1ccc(c(c1)C(=O)O)NC(=O)c1cccc(c1)S(=O)(=O)N1CCc2c(C1)cccc2	✓
OC(=O)C1CCC(=CC1)c1nc(n2c1cccc2)C(=O)c1c(Cl)cccc1C(F)(F)F	✓
Brc1ccc(c(c1)NC(=O)c1cccc(c1)S(=O)(=O)N1CCc2c(C1)cccc2)C(=O)O	✓
N#Cc1cccc(c1C(=O)c1nc(c2n1CCCC2)c1ccc(cc1F)C(=O)O)Cl	✓
OC(=O)c1ccc(c(c1)F)c1nc(n2c1CCCC2)C(=O)c1c(Cl)cccc1C(F)(F)F	✓
OC(=O)c1ccc(c(c1)F)c1nc(n2c1CCCC2)C(=O)c1c(Cl)cccc1C1CC1	✓
Fc1cc(ccc1c1nc(n2c1CCCC2)C(=O)c1c(Cl)cccc1Cl)C(=O)O	✓
OC(=O)c1ccc(c(c1)F)c1nc(n2c1CCCC2)C(=O)c1c(F)cccc1Cl	✓
Fc1cc(ccc1c1nc(n2c1CCCC2)C(=O)c1ccccc1C(F)(F)F)C(=O)O	✓
OC(=O)c1ccc(cc1)c1nc(n2c1cccc2)C(=O)c1c(Cl)cccc1C(F)(F)F	✓
OC(=O)c1ccc(cc1)c1nc(n2c1nccc2)C(=O)c1c(Cl)cccc1C(F)(F)F	✓
OC(=O)c1ccc(cc1)c1nn(c2c1cccc2)C(=O)c1c(Cl)cccc1C(F)(F)F	✓
Brc1ccccc1CSc1nnnn1c1ccc(cc1)C(=O)O	✓
OC(=O)c1ccc(cc1O)c1nc(n2c1cccc2)C(=O)c1c(Cl)cccc1C(F)(F)F	✓
OC(=O)c1ccc(cc1O)c1nc(n2c1nccc2)C(=O)c1c(Cl)cccc1C1CC1	✓
OC(=O)c1ccc(cc1)COc1ccc2c(c1/C=N/c1ccc(cc1)N1CCOCC1)cccc2	✓
OC(=O)c1ccc(cc1)COc1ccccc1C=C1C(=O)c2c(C1=O)cccc2	✓
OC(=O)C1CCc2c(O1)cc(cc2)OCCCOc1ccc(cc1Cl)OCC(F)(F)F	✓
OC(=O)c1cccc(c1)OS(=O)(=O)/C=C/c1ccccc1	✓
Clc1ccc(c(c1)C(=O)O)NC(=O)c1cccc(c1)S(=O)(=O)N1CCc2c(C1)cccc2C(=O)O	✓
O=C(c1cccc(c1)S(=O)(=O)N1CCc2c(C1)cccc2)Nc1ccccc1C(=O)O	✓
Fc1ccc(cc1)CCc1c([nH]c2c1cc(cc2)CC(=O)O)c1ccc(cc1)F						✓	✓		✓
OC(=O)Cc1ccc2c(c1)c(CCc1ccccc1)c([nH]2)c1ccccc1						✓	✓		✓
OC(=O)Cc1ccc2c(c1)cc([nH]2)c1ccccc1						✓	✓		✓
OC(=O)Cc1coc2c1ccc(c2)OCc1cccc(c1)COc1ccc(cc1)C(F)(F)F	✓
OC(=O)Cc1csc2c1ccc(c2)OCc1ccc(cc1)COc1ccc(cc1)C(F)(F)F	✓
OC(=O)Cc1csc2c1ccc(c2)OCc1cccc(c1)COc1ccc(cc1)C(F)(F)F	✓
OC(=O)CCc1ccc(cc1)CNC(=O)c1cccc(c1)CNC(=O)c1ccccc1	✓
OC(=O)CCc1ccc(cc1)OCCCOc1ccc(cc1Cl)Oc1ccc(cc1)F	✓
OC(=O)CCc1ccc2c(c1)c(CCc1ccccc1)c([nH]2)c1ccccc1						✓	✓
OC(=O)CCN1C(=S)S/C(=C/c2ccc(cc2Cl)Cl)/C1=O	✓	✓
OC(=O)Cn1c(SCCOc2ccc3c(c2)cccc3)nc2c1cccc2	✓
OC(=O)Cn1ccc2c1cccc2OCCCOc1ccc(cc1)C(=O)c1ccc(cc1)F	✓
OC(=O)Cn1ccc2c1cccc2OCCCOc1ccc2c(c1)ccc(c2)C(=O)c1ccccc1	✓
OC(=O)Cn1ccc2c1ccc(c2)OCCCOc1ccc(cc1)C(=O)c1ccc(cc1)F	✓
OC(=O)Cn1ccc2c1ccc(c2)OCCCOc1ccc2c(c1)ccc(c2)C(=O)c1ccccc1	✓
OC(=O)Cn1ccc2c1cc(OCCCOc1ccc(cc1)C(=O)c1ccc(cc1)F)cc2	✓
OC(=O)Cn1ccc2c1cc(OCCCOc1ccc3c(c1)ccc(c3)C(=O)c1ccccc1)cc2	✓
OC(=O)COc1ccc(c2c1CCCC2)Sc1ccc(cc1Cl)COc1ccc(cc1)C(F)(F)F						✓	✓
C#CCOc1cc(ccc1Sc1ccc(c2c1CCCC2)OCC(=O)O)COc1ccc(cc1)C(F)(F)F						✓	✓
OC(=O)COc1ccc(c2c1CCCC2)Sc1ccc(cc1OCC#Cc1cccnc1)COc1ccc(cc1)C(F)(F)F						✓	✓
OC(=O)COc1ccc(c2c1CCCO2)SCc1ccc(cc1)OCc1ccc(cc1)C(F)(F)F	✓
OC(=O)COc1ccc(c2c1CCC2)SCc1ccc(cc1)OCc1ccccc1	✓
OC(=O)COc1cccc2c1CCN(C2)S(=O)(=O)c1cccc(c1)C(=O)Nc1ccc(cc1C(=O)O)Cl	✓
OC(=O)CSc1nc(OCCc2ccccc2)cc(n1)OCCc1ccccc1	✓
Oc1ccc2c(c1)cc(n2Cc1cccc(c1)C(F)(F)F)C(=O)NS(=O)(=O)c1cccc(c1)C(F)(F)F	✓
OCC#CCOc1cc(ccc1Sc1ccc(c2c1CCCC2)OCC(=O)O)COc1ccc(cc1)C(F)(F)F						✓	✓
OCCC#CCOc1cc(ccc1Sc1ccc(c2c1CCCC2)OCC(=O)O)COc1ccc(cc1)C(F)(F)F						✓	✓
OCCN(c1ccc(cc1)C=C1C(=O)NC(=O)NC1=O)CCOC(c1ccccc1)(c1ccccc1)c1ccccc1	✓
